# Supplementary material
Source: publisher figshare collection journal article supplement (https://acs.figshare.com/ndownloader/files/7999942)

## Supporting Information

### 2-Aminopyrimidin Derivatives as New Selective Fibroblast Growth

#### Factor Receptor 4 (FGFR4) Inhibitors

Cheng Mo,<sup>a,b</sup> Zhang Zhang,<sup>c</sup> Christopher P. Guise,<sup>e,d</sup> Xueqiang Li,<sup>a,b</sup> Jinfeng Luo,<sup>a</sup> Zhengchao Tu,<sup>a</sup> Yong Xu,<sup>a</sup> Adam V. Patterson,<sup>e,d</sup> Jeff B. Smaill,<sup>e,d\*</sup> Xiaomei Ren,<sup>c\*</sup> Xiaoyun Lu,<sup>c\*</sup> Ke Ding<sup>c\*</sup>

<sup>a</sup> State Key Laboratory of Respiratory Diseases, Guangzhou Institutes of Biomedicine and Health, Chinese Academy of Sciences, #190 Kaiyuan Avenue, Guangzhou 510530, China

<sup>b</sup> University of Chinese Academy of Sciences, #19 Yuquan Road, Beijing 100049, China

<sup>c</sup> School of Pharmacy, Jinan University, # 601 Huangpu Avenue West, Guangzhou 510632, China.

<sup>d</sup> Auckland Cancer Society Research Centre, University of Auckland, #92019 Private Bag, Auckland 1142, New Zealand

<sup>e</sup> Maurice Wilkins Centre for Molecular Biodiscovery, University of Auckland, #92019 Private Bag, Auckland 1142, New Zealand

#### Contents:

|                                                                                   |         |
|-----------------------------------------------------------------------------------|---------|
| Figure S1. Chemical structure of BLU554.....                                      | S2      |
| Table S1. Kinase inhibitory activities of compound <b>3a</b> .....                | S2      |
| Abbreviations.....                                                                | S2      |
| General methods for chemistry.....                                                | S2      |
| Synthetic procedures and compound characterization.....                           | S3-S17  |
| Computational study.....                                                          | S18     |
| Materials and methods for biological assays.....                                  | S18-S19 |
| Table S2. Matrix of compound screen for inhibitor <b>2n</b> .....                 | S20-S23 |
| Table S3. S-score Table for <b>2n</b> .....                                       | S23     |
| Figure S2. Compound <b>2n</b> induces apoptosis in MDA-MB-453 cells.....          | S24     |
| <sup>1</sup> H NMR and <sup>13</sup> C NMR spectra of compound <b>2a-2z</b> ..... | S25-S50 |

Figure S1. The chemical structure of BLU554.

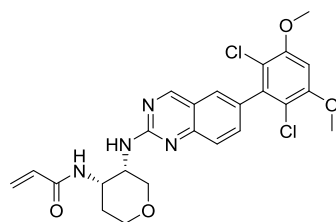

Table S1. Kinase inhibitory activities of compound **3a**

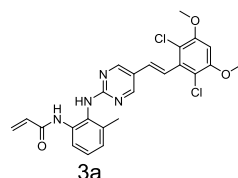

|           | Kinase activity (IC <sub>50</sub> , nM) |       |       |       |
|-----------|-----------------------------------------|-------|-------|-------|
|           | FGFR1                                   | FGFR2 | FGFR3 | FGFR4 |
| <b>3a</b> | >10,000                                 | 2920  | 756   | 6.3   |

**Abbreviations.** ERK, extracellular signal-regulated kinase; FRS2, fibroblast growth factor substrate 2; IC<sub>50</sub>, the half maximal (50%) inhibitory concentration (IC) of a substance; SD, standard deviation; TFA, trifluoroacetic acid; DCM, dichloromethane; THF, tetrahydrofuran; DMF, N,N-dimethylformamide; EA, ethylacetate; PE, petroleum ether; Boc<sub>2</sub>O, Di-tert-butyl dicarbonate; DIEA, ethyldiisopropylamine;

**General Methods for Chemistry.** All reagents and solvents were used directly as purchased from commercial sources. Flash chromatography was performed using silica gel (200-300 mesh). All reactions were monitored by TLC, using silica gel plates with fluorescence GF254 and UV light visualization. <sup>1</sup>H NMR and <sup>13</sup>C NMR spectra were recorded on a AV-400 spectrometer at 400 MHz and AV-500 spectrometer at 125 MHz. Coupling constants (*J*) are expressed in hertz (Hz). Chemical shifts (δ) of NMR are reported in parts per million (ppm) units relative to an internal control (TMS). High resolution ESI-MS on an Applied Biosystems Q-STAR Elite ESI-LC-MS/MS mass spectrometer. The purity of compounds was determined by reverse-phase high performance liquid chromatography (HPLC) analysis to be >95%. HPLC instrument, Dionex Summit HPLC (column: Diamonsil C18, 5.0 μM, 4.6 × 250 mm (Dikma Technologies); detector, PDA-100 photodiode array; injector, ASI-100 autoinjector; pump, p-680A). A flow rate of 1.0 ml/min was used with a mobile phase of MeOH in H<sub>2</sub>O with a 0.1% modifier (ammonia or trifluoroacetate, v/v).

## Synthetic procedures and compound characterization.

### Scheme S1. Synthesis of compound 2a

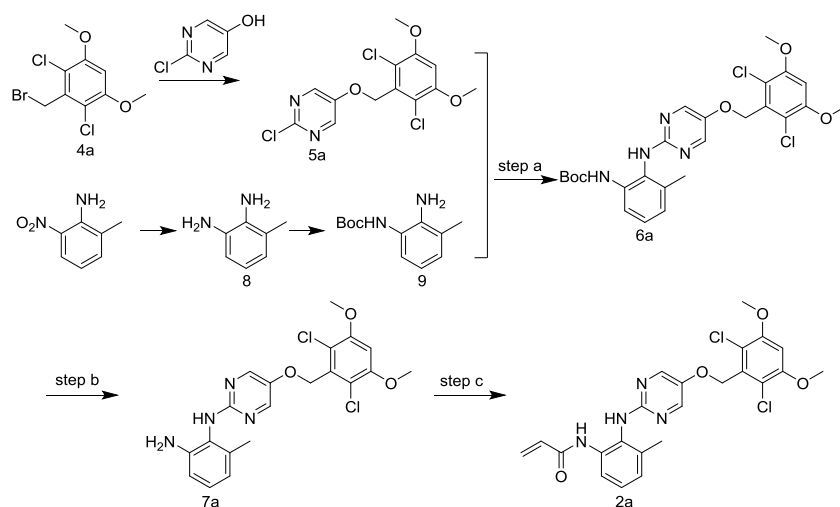

**2-chloro-5-((2,6-dichloro-3,5-dimethoxybenzyl)oxy)pyrimidine (5a):** A mixture of 3-(bromomethyl)-2,4-dichloro-1,5-dimethoxybenzene (6.3g, 21mmol, 1.05eq) (preparation according to WO 2014182829), 2-chloropyrimidin-5-ol (2.61g, 20mmol, 1.0eq),  $\text{Bu}_4\text{N}^+ \cdot \text{I}^-$  (1.48g, 4mmol, 0.2eq) and  $\text{K}_2\text{CO}_3$  (5.53g, 40mmol, 2.0eq) in DMF (80ml, 4ml/mmol) was stirred at 60 °C for 2h. The resulting mixture was poured into ice and stirred. Then the mixture was filtered, and the filter cake was washed with water for several times and dried in vacuo at 50 °C (6.31g, yield: 90.25%).  $^1\text{H}$  NMR (400 MHz,  $\text{DMSO-d}_6$ ):  $\delta$ (ppm) 8.68 (s, 2H), 7.02 (s, 1H), 5.42 (s, 2H), 3.95 (s, 6H).

**3-methylbenzene-1,2-diamine (8):** To a solution of 2-methyl-6-nitroaniline (5g, 2.86mmol) in MeOH (50ml) was added 10% Pd/C (0.25g). The mixture was degassed and purged with hydrogen and stirred at room temperature overnight. The solution was filtered and concentrated. Purification by column chromatography (DCM/MeOH) through silica gel afforded the intermediate (1.83g, yield: 45.68%).  $^1\text{H}$  NMR (400 MHz,  $\text{DMSO-d}_6$ ):  $\delta$ (ppm) 6.41-6.39 (m, 1H), 6.31-6.28 (m, 2H), 4.36 (brs, 2H), 4.13 (brs, 2H), 2.03 (s, 3H).

**tert-butyl (2-amino-3-methylphenyl)carbamate(9):** To a solution of compound 8 (1.83g, 15.01mmol, 1.0eq) in dry THF (11.26ml) containing triethylamine (2.19ml, 1.05eq) was added  $\text{Boc}_2\text{O}$  (3.28g, 1.0eq) drop-wise at 0 °C. Then the mixture was stirred at room temperature overnight. The reaction was diluted with EA and washed with water, brine, dried and concentrated. Purification by column chromatography (PE/EA) through silica gel afforded the intermediate (1.91g, yield: 57.42%).  $^1\text{H}$  NMR (400 MHz,  $\text{DMSO-d}_6$ ):  $\delta$ (ppm) 8.25 (m, 1H), 7.02 (d,  $J = 8.0$  Hz 1H), 6.77 (d,  $J = 7.2$  Hz 1H), 6.46 (t,  $J = 7.6$  Hz, 1H), 4.52 (s, 2H), 2.08 (s, 3H), 1.45 (s, 9H).

**tert-butyl(2-((5-((2,6-dichloro-3,5-dimethoxybenzyl)oxy)pyrimidin-2-yl)amino)-3-methylphenyl)carbamate (6a):**

To a solution of compound 5a (349mg, 1.0mmol, 1.0eq) in 1,4-dioxane (10ml, 10ml/mmol) were added compound 9 (244mg, 1.1mmol, 1.1eq),  $\text{Pd}(\text{OAc})_2$  (22mg, 0.1mmol, 0.1eq), XantPhos (115mg, 0.2mmol, 0.2eq) and  $\text{Cs}_2\text{CO}_3$  (651mg, 2mmol, 2.0eq). The mixture was degassed and purged again with argon, then heated at 100 °C overnight. After cooling, the solvent was evaporated under reduced pressure. The residue was dissolved in DCM and filtered. The filtrate was concentrated. Purification by column chromatography (PE/EA) through silica gel afforded the intermediate (246mg, yield: 45.95%).  $^1\text{H}$  NMR (400 MHz,  $\text{DMSO-d}_6$ ):  $\delta$ (ppm) 8.21 (s, 3H), 8.12 (s,

1H), 7.55 (d, *J* = 7.9 Hz, 1H), 7.10 (t, *J* = 7.8 Hz, 1H), 6.99 (s, 1H), 6.95 (d, *J* = 7.5 Hz, 1H), 5.23 (s, 2H), 3.94 (s, 6H), 2.07 (s, 3H), 1.43 (s, 9H).

**N<sup>1</sup>-(5-((2,6-dichloro-3,5-dimethoxybenzyl)oxy)pyrimidin-2-yl)-6-methylbenzene-1,2-diamine**

**(7a):** compound 6a (246mg, 0.4596mmol) was dissolved in DCM/TFA (2:1 volume/volume, 18ml), and the mixture was stirred at room temperature overnight. The solvent was evaporated under reduced pressure. The residue was dissolved in DCM and washed with saturated aqueous NaHCO<sub>3</sub>, brine, dried, and concentrated. Purification by column chromatography (DCM/MeOH) through silica gel afforded the desired product (158mg, 0.363mmol, yield: 78.98%). <sup>1</sup>H NMR (400 MHz, DMSO-d<sub>6</sub>): δ(ppm) 8.16 (s, 2H), 8.03 (s, 1H), 6.99 (s, 1H), 6.83 (t, *J* = 7.7 Hz, 1H), 6.56 (d, *J* = 7.8 Hz, 1H), 6.42 (d, *J* = 7.3 Hz, 1H), 5.21 (s, 2H), 4.65 (s, 2H), 3.94 (s, 6H), 2.00 (s, 3H).

**N-(2-((5-((2,6-dichloro-3,5-dimethoxybenzyl)oxy)pyrimidin-2-yl)amino)-3-methylphenyl)acrylamide (2a):**

To a solution of compound 7a (158mg, 0.363mmol, 1.0eq) in dry DCM(3ml, 8ml/mmol) containing DIEA(70mg, 0.545mmol, 1.5eq) was added acryloyl chloride(39mg, 0.4356mmol, 1.2eq) drop-wise at 0°C. The mixture was stirred at 0°C for 3h. Then water was added and diluted with DCM. The organic layer was wash with brine, dried and concentrated. Purification by column chromatography (DCM/MeOH) through silica gel afforded the desired product (122mg, yield: 68.53%). <sup>1</sup>H NMR (500 MHz, DMSO-d<sub>6</sub>): δ(ppm) 9.48 (s, 1H), 8.19 (s, 2H), 8.10 (s, 1H), 7.65 (d, *J* = 7.7 Hz, 1H), 7.14 (t, *J* = 7.8 Hz, 1H), 7.06 (d, *J* = 7.3 Hz, 1H), 6.99 (s, 1H), 6.50 (dd, *J* = 17.0, 10.2 Hz, 1H), 6.21 (dd, *J* = 17.0, 1.7 Hz, 1H), 5.70 (dd, *J* = 10.2, 1.6 Hz, 1H), 5.22 (s, 2H), 3.94 (s, 6H), 2.10 (s, 3H). <sup>13</sup>C NMR (125 MHz, DMSO-d<sub>6</sub>): δ(ppm) 163.39, 157.02, 154.37, 146.48, 146.26, 136.72, 134.75, 132.35, 131.84, 130.70, 126.73, 126.47, 125.62, 120.70, 114.74, 99.14, 67.14, 56.76, 18.40. HRMS (ESI) calcd for C<sub>23</sub>H<sub>22</sub>Cl<sub>2</sub>N<sub>4</sub>O<sub>4</sub> [M+H]<sup>+</sup> : 489.10909; found 489.10929. HPLC purity=97.86%, Rt 7.26 min.

**Scheme S2. Synthesis of compound 2b**

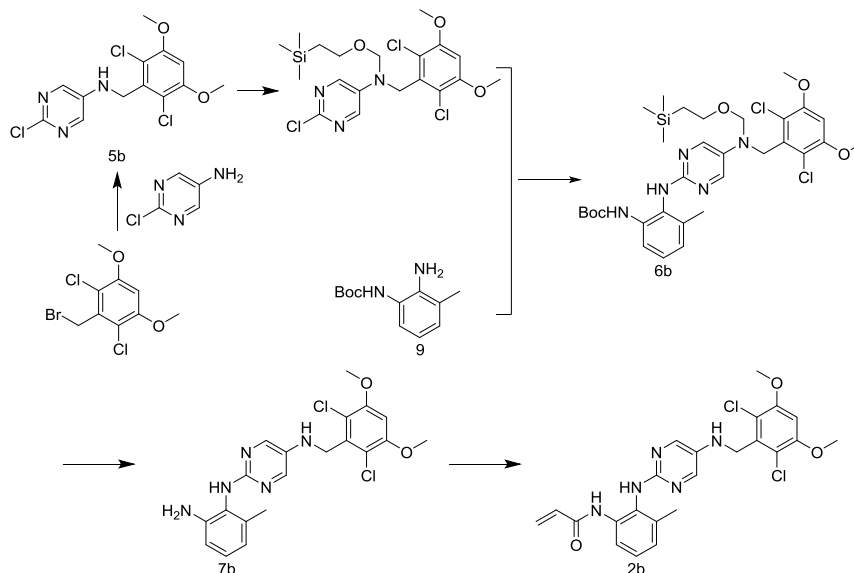

**2-chloro-N-(2,6-dichloro-3,5-dimethoxybenzyl)pyrimidin-5-amine(5b):** the title compound was synthesized following the procedure for compound 5a with 2-chloropyrimidin-5-amine and 3-(bromomethyl)-2,4-dichloro-1,5-dimethoxybenzene. <sup>1</sup>H NMR (400 MHz, DMSO-d<sub>6</sub>): δ(ppm) 8.18 (s, 2H), 6.95 (s, 1H), 6.99 (s, 1H), 6.51 (t, *J* = 4.8 Hz, 1H), 4.45 (d, *J* = 4.8Hz, 3H), 3.93 (s, 1H). 2-chloro-N-(2,6-dichloro-3,5-dimethoxybenzyl)-N-((2-(trimethylsilyl)ethoxy)methyl)pyrimidin-5-a

mine: A mixture compound 5b (174mg, 0.5mmol, 1.0eq) and K<sub>2</sub>CO<sub>3</sub>(138mg, 1mmol, 2.0eq) was taken in DMF(2ml, 4ml/mmol) and 2-(trimethylsilyl) ethoxymethyl chloride(125mg, 0.75mmol, 1.5eq) was added drop wise. The reaction mixture was stirred at room temperature for 5h, diluted with water. The aqueous layer was extracted with EA. The organic layer was washed with brine, dried and concentrated. The residue was purified by column chromatography to obtain 2-chloro-N-(2,6-dichloro-3,5-dimethoxybenzyl)-N-((2-(trimethylsilyl)ethoxy)methyl)pyrimidin-5-amine (100mg, yield: 41.76%). <sup>1</sup>H NMR (400 MHz, DMSO-d<sub>6</sub>): δ(ppm) 8.53 (s, 2H), 6.96 (s, 1H), 4.81 (s, 2H), 4.56 (s, 2H), 3.93 (s, 6H), 3.20 (t, J = 8 Hz, 2H), 0.69 (t, J = 8 Hz, 2H), -0.11 (s, 9H).

**tert-butyl(2-((5-((2,6-dichloro-3,5-dimethoxybenzyl)((2-(trimethylsilyl)ethoxy)methyl)amino)pyrimidin-2-yl)amino)-3-methylphenyl)carbamate(6b):** the title compound was synthesized following the procedure for compound of 6a, but used directly for the next step.

**N<sup>2</sup>-(2-amino-6-methylphenyl)-N<sup>5</sup>-(2,6-dichloro-3,5-dimethoxybenzyl)pyrimidine-2,5-diamine(7b):** the crude of 6b was dissolved in DCM/TFA (2:1 volume/volume), and the mixture was stirred at room temperature overnight. The solvent was evaporated under reduced pressure. The residue was dissolved in DCM and washed with saturated aqueous NaHCO<sub>3</sub>, brine, dried, and concentrated. Purification by column chromatography (DCM/MeOH) through silica gel afforded the desired product. <sup>1</sup>H NMR (500 MHz, DMSO-d<sub>6</sub>): δ(ppm) 7.90 (s, 2H), 7.54 (s, 1H), 6.90 (s, 1H), 6.81 (t, J = 7.7 Hz, 1H), 6.54 (d, J = 7.8 Hz, 1H), 6.41 (d, J = 7.3 Hz, 1H), 5.11 (t, J = 5.7 Hz, 1H), 4.59 (s, 2H), 4.34 (d, J = 5.8 Hz, 2H), 3.92 (s, 6H), 1.99 (s, 3H).

**N-(2-((5-((2,6-dichloro-3,5-dimethoxybenzyl)amino)pyrimidin-2-yl)amino)-3-methylphenyl)acrylamide(2b):**

The title compound was synthesized following the procedure for compound 2a.

<sup>1</sup>H NMR (400 MHz, DMSO-d<sub>6</sub>): δ(ppm) 9.48 (s, 1H), 7.92 (s, 2H), 7.66 (s, 1H), 7.62 (d, J = 7.7 Hz, 1H), 7.10 (t, J = 7.7 Hz, 1H), 7.04 (d, J = 7.2 Hz, 1H), 6.91 (s, 1H), 6.47 (dd, J = 17.0, 10.2 Hz, 1H), 6.20 (dd, J = 17.0, 1.7 Hz, 1H), 5.69 (dd, J = 17.0, 1.7 Hz, 1H), 5.25 (t, J = 5.6 Hz, 1H), 4.34 (d, J = 5.6 Hz, 2H), 3.92 (s, 6H), 2.09 (s, 3H). <sup>13</sup>C NMR (500 MHz, DMSO-d<sub>6</sub>): δ(ppm) 163.35, 154.83, 154.26, 143.33, 136.60, 135.68, 135.22, 134.53, 131.67 (d, J = 216 Hz, 1C), , 126.65, 126.49, 125.12, 120.60, 114.22, 97.84, 56.65, 44.03, 18.50. <sup>13</sup>C NMR (125 MHz, DMSO-d<sub>6</sub>): δ(ppm) 163.35, 154.83, 154.26, 143.33, 136.60, 135.68, 135.22, 134.53, 131.88, 131.44, 126.65, 126.49, 125.12, 120.60, 114.22, 97.84, 56.65, 44.03, 18.50. HRMS (ESI) calcd for C<sub>23</sub>H<sub>23</sub>Cl<sub>2</sub>N<sub>5</sub>O<sub>3</sub> [M+H]<sup>+</sup> : 488.12507; found 488.12494. HPLC purity=96.30%, Rt 6.50 min.

**N-(2-((5-((2,6-dichloro-3,5-dimethoxybenzyl)oxy)pyrimidin-2-yl)amino)-6-methylphenyl)acrylamide (2c)** was synthesized following the approach outlined in Scheme S1(Example 2a) substituting tert-butyl (2-amino-3-methylphenyl)carbamate with tert-butyl (2-amino-6-methylphenyl)carbamate (prepared by the method outlined below).

<sup>1</sup>H NMR (400 MHz, DMSO-d<sub>6</sub>): δ(ppm) 9.57 (s, 1H), 8.33 (s, 2H), 8.00 (s, 1H), 7.84 (d, J = 8.0 Hz, 1H), 7.16 (t, J = 7.9 Hz, 1H), 7.00 (s, 1H), 6.95 (d, J = 7.4 Hz, 1H), 6.51 (dd, J = 17.1, 10.2 Hz, 1H), 6.26 (dd, J = 17.1, 1.8 Hz, 1H), 5.78 (dd, J = 10.2, 1.8 Hz, 1H), 5.29 (s, 2H), 3.94 (s, 6H), 2.18 (s, 3H). <sup>13</sup>C NMR (500 MHz, DMSO-d<sub>6</sub>): δ(ppm) 163.81, 155.39, 154.39, 146.83, 146.30, 136.07, 135.07, 132.26, 131.12, 126.88, 126.43, 126.41, 124.05, 119.06, 114.74, 99.17, 67.12, 56.77, 18.29. HRMS (ESI) calcd for C<sub>23</sub>H<sub>22</sub>Cl<sub>2</sub>N<sub>4</sub>O<sub>4</sub> [M+H]<sup>+</sup> : 489.10909; found 489.10929. HPLC purity=99.08%, Rt 7.83 min.

**Preparation of tert-butyl (2-amino-6-methylphenyl)carbamate.**

**a. tert-butyl (2-methyl-6-nitrophenyl)carbamate**

To a solution of 2-methyl-6-nitroaniline(1.826g, 12mmol, 1.0eq) in anhydrous THF(120ml, 10ml/mmol) was added Boc<sub>2</sub>O(7.857g, 36mmol, 3.0eq) followed by DMAP(0.151g, 1.2mmol, 0.1eq). The mixture was stirred at reflux for 3h then cooled to ambient temperature. The solvent was evaporated. The residue was dissolved in MeOH (100ml) followed by K<sub>2</sub>CO<sub>3</sub>(4.975g, 3.0eq). The mixture was stirred at reflux for 3h. The mixture was cooled to ambient temperature and concentrated. The residue was dissolved in EA and washed with water, brine, dried and concentrated. Purification by column chromatography (PE/EA) through silica gel afforded the intermediate (0.7g, yield: 35.84%). <sup>1</sup>H NMR (400 MHz, DMSO-d<sub>6</sub>): δ(ppm) 9.10 (s, 1H), 7.71 (d, *J* = 7.9 Hz, 1H), 7.56 (d, *J* = 7.6 Hz, 1H), 7.32 (t, *J* = 7.9 Hz, 1H), 2.27 (d, *J* = 11.0 Hz, 3H), 1.37 (d, *J* = 44.5 Hz, 9H).

**b. tert-butyl (2-amino-6-methylphenyl)carbamate**

The title compound was synthesized following the procedure of compound 8 in Scheme S1 substituting tert-butyl (2-methyl-6-nitrophenyl)carbamate. <sup>1</sup>H NMR (400 MHz, DMSO-d<sub>6</sub>): δ(ppm) 8.01 (s, 1H), 6.83 (t, *J* = 7.7 Hz, 1H), 6.53 (d, *J* = 7.8 Hz, 1H), 6.41 (d, *J* = 7.3 Hz, 1H), 4.65 (s, 2H), 2.06 (s, 3H), 1.44 (s, 9H).

**N-(2-((5-((2,6-dichloro-3,5-dimethoxybenzyl)oxy)pyrimidin-2-yl)amino)-5-methylphenyl)**

**Acrylamide (2d)** was synthesized following the approach outlined in Scheme S1 (Example2a) substituting tert-butyl (2-amino-5-methylphenyl)carbamate (prepared by the method outlined below).

<sup>1</sup>H NMR (400 MHz, DMSO-d<sub>6</sub>): δ(ppm) 9.75 (s, 1H), 8.33 (s, 1H), 8.28 (s, 2H), 7.63 (d, *J* = 8.3 Hz, 1H), 7.34 (s, 1H), 6.99 (m, 2H), 6.49 (dd, *J* = 17.0, 10.2 Hz, 1H), 6.26 (dd, *J* = 17.0, 1.8 Hz, 1H), 5.76 (d, *J* = 17.0, 1.8 Hz, 1H), 5.27 (s, 2H), 3.94 (s, 6H), 2.28 (s, 3H). <sup>13</sup>C NMR (500 MHz, DMSO-d<sub>6</sub>): δ(ppm) 163.64, 156.03, 154.38, 146.68, 146.37, 132.31, 132.24, 131.55, 130.49, 129.32, 126.92, 125.82, 124.77, 123.51, 114.76, 99.09, 67.18, 56.73, 20.45. HRMS (ESI) calcd for C<sub>23</sub>H<sub>22</sub>Cl<sub>2</sub>N<sub>4</sub>O<sub>4</sub> [M+H]<sup>+</sup> : 489.10909; found 489.10929. HPLC purity=99.18%, Rt 8.44 min.

**Preparation of tert-butyl (2-amino-5-methylphenyl)carbamate.**

**a. tert-butyl (5-methyl-2-nitrophenyl)carbamate**

A solution of NaH (1.76g, 2.2eq) in dry THF( 27.7ml, 0.63ml/mmol) at 0°C was slowly treated with a solution of 5-methyl-2-nitroaniline (3.043g, 20mmol, 1.0eq) in dry THF(27.6ml, 1.38ml/mmol). The mixture was stirred for 10 min at 0°C, and then at room temperature for 30 min. A solution of Boc<sub>2</sub>O( 4.801g, 22mmol, 1.1eq) in dry THF(5.5ml, 0.25ml/mmol) was added to the reaction mixture and stirred at room temperature overnight. Water was slowly added and the reaction mixture was extracted with EA. The organic phase was wash with brine, dried and concentrated. Purification by column chromatography(PE/EA) through silica gel afforded the intermediate(2.55g, yield: 50.56%). <sup>1</sup>H NMR (400 MHz, DMSO-d<sub>6</sub>): δ(ppm) 9.55 (s, 1H), 7.89 (d, *J* = 8.4 Hz, 1H), 7.59 (s, 1H), 7.08 (dd, *J* = 8.5, 1.2 Hz, 1H), 2.37 (s, 3H), 1.45 (s, 9H).

**b. tert-butyl (2-amino-5-methylphenyl)carbamate**

The title compound was synthesized following the procedure of compound 8 in Scheme S1 substituting tert-butyl (5-methyl-2-nitrophenyl)carbamate. <sup>1</sup>H NMR (400 MHz, DMSO-d<sub>6</sub>): δ(ppm) 8.22 (s, 1H), 7.03 (s, 1H), 6.65 (dd, *J* = 8.0, 1.3 Hz, 1H), 6.58 (d, *J* = 8.0 Hz, 1H), 4.60 (s, 2H), 2.12 (s, 3H), 1.45 (s, 9H).

**N-(2-((5-((2,6-dichloro-3,5-dimethoxybenzyl)oxy)pyrimidin-2-yl)amino)-4-methylphenyl)**

**acrylamide (2e)** was synthesized following the approach outlined in Scheme S1 (Example 2a) substituting tert-butyl (2-amino-4-methylphenyl)carbamate (prepared by the method of

corresponding intermediate of 2d).

<sup>1</sup>H NMR (400 MHz, DMSO-d<sub>6</sub>): δ(ppm) 9.77 (s, 1H), 8.37 (s, 1H), 8.32 (s, 2H), 7.63 (s, 1H), 7.35 (d, *J* = 8.1 Hz, 1H), 7.00 (s, 1H), 6.88 (d, *J* = 8.1 Hz, 1H), 6.48 (dd, *J* = 17.0, 10.1 Hz, 1H), 6.25 (dd, *J* = 17.0, 1.8 Hz, 1H), 5.76 (d, *J* = 10.4, 1H), 5.28 (s, 2H), 3.94 (s, 6H), 2.28 (s, 3H). <sup>13</sup>C NMR (500 MHz, DMSO-d<sub>6</sub>): δ(ppm) 163.70, 155.75, 154.39, 146.80, 146.31, 134.53, 133.09, 132.30, 131.50, 126.86, 126.56, 124.56, 123.60, 123.32, 114.76, 99.15, 67.12, 56.77, 20.81. HRMS (ESI) calcd for C<sub>23</sub>H<sub>22</sub>Cl<sub>2</sub>N<sub>4</sub>O<sub>4</sub> [M+H]<sup>+</sup>: 489.10909; found 489.10929. HPLC purity=97.69%, Rt 8.46 min.

**N-(2-((5-((2,6-dichloro-3,5-dimethoxybenzyl)oxy)pyrimidin-2-yl)amino)phenyl)acrylamide (2f)** was synthesized following the approach outlined in Scheme S1(Example 2a) substituting tert-butyl (2-amino-3-methylphenyl)carbamate with tert-butyl (2-aminophenyl)carbamate (prepared by the method of compound 9 in Scheme S1 with benzene-1,2-diamine).

<sup>1</sup>H NMR (400 MHz, DMSO-d<sub>6</sub>): δ(ppm) 9.83 (s, 1H), 8.44 (s, 1H), 8.31 (s, 2H), 7.80 (d, *J* = 7.1 Hz, 1H), 7.51 (d, *J* = 7.6 Hz, 1H), 7.17 (td, *J* = 8.4, 1.4 Hz, 1H), 7.06 (td, *J* = 7.8, 1.4 Hz, 1H), 7.00 (s, 1H), 6.50 (dd, *J* = 17.0, 10.1 Hz, 1H), 6.27 (dd, *J* = 17.0, 1.9 Hz, 1H), 5.77 (dd, *J* = 10.2, 1.8 Hz, 1H), 5.28 (s, 2H), 3.94 (s, 6H). <sup>13</sup>C NMR (500 MHz, DMSO-d<sub>6</sub>): δ(ppm) 163.71, 155.74, 154.38, 146.84, 146.31, 133.14, 132.28, 131.49, 129.15, 127.02, 125.23, 124.62, 123.16, 122.91, 114.73, 99.16, 67.13, 56.76. HRMS (ESI) calcd for C<sub>22</sub>H<sub>20</sub>Cl<sub>2</sub>N<sub>4</sub>O<sub>4</sub> [M+H]<sup>+</sup>: 475.09344; found 475.09299. HPLC purity=96.86%, Rt 7.82 min.

**N-(2-((5-((2,6-dichloro-3,5-dimethoxybenzyl)oxy)pyrimidin-2-yl)amino)-3-ethylphenyl)acrylamide (2g)** was synthesized following the approach outlined in Scheme S1(Example 2a) substituting tert-butyl (2-amino-3-methylphenyl)carbamate with tert-butyl (2-amino-3-ethylphenyl)carbamate (prepared by the method outlined below).

<sup>1</sup>H NMR (400 MHz, DMSO-d<sub>6</sub>): δ(ppm) 9.39 (s, 1H), 8.18 (s, 2H), 8.07 (s, 1H), 7.69 (d, *J* = 7.8 Hz, 1H), 7.20 (t, *J* = 7.8 Hz, 1H), 7.08 (d, *J* = 7.2 Hz, 1H), 6.99 (s, 1H), 6.49 (dd, *J* = 17.0, 10.2 Hz, 1H), 6.19 (dd, *J* = 17.0, 1.9 Hz, 1H), 5.68 (dd, *J* = 10.2, 1.9 Hz, 1H), 5.21 (s, 2H), 3.93 (s, 6H), 2.49 (q, *J* = 7.5 Hz, 2H), 1.05 (t, *J* = 7.5 Hz, 3H). <sup>13</sup>C NMR (500 MHz, DMSO-d<sub>6</sub>): δ(ppm) 163.34, 157.48, 154.36, 146.52, 146.24, 142.42, 135.16, 132.34, 131.91, 130.08, 126.60, 126.04, 124.53, 120.66, 114.75, 99.09, 67.17, 56.74, 24.27, 14.00. HRMS (ESI) calcd for C<sub>24</sub>H<sub>24</sub>Cl<sub>2</sub>N<sub>4</sub>O<sub>4</sub> [M+H]<sup>+</sup>: 503.12474; found 503.12469. HPLC purity=99.06%, Rt 7.92 min.

#### Preparation of tert-butyl (2-amino-3-ethylphenyl)carbamate

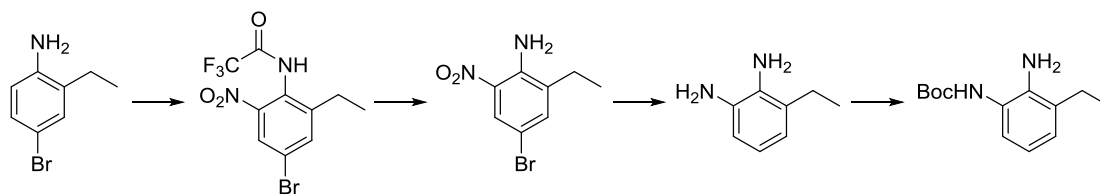

**a. N-(4-bromo-2-ethyl-6-nitrophenyl)-2,2,2-trifluoroacetamide:** To trifluoroacetic anhydride(20.85ml, 150mmol, 10.0eq) stirring at 2 °C was slowly added 4-bromo-2-ethylaniline(3.0g, 15mmol, 1.0eq) drop-wise followed by anhydrous 2-methyltetrahydrofuran(1.8ml, 0.12ml/mmol). The cold bath was removed and ammonium nitrate(1.56g, 19.5mmol, 1.3eq) was added. A cold water bath was used to control the temperature below 40°C. After 30 min, the cold bath was the removed and stirring continued for another 40 min. Crushed ice was slowly added to the reaction, and the mixture was extracted with EA. The organic layer was washed with brine, dried and concentrated. Purification by column chromatography (PE/EA) through silica gel afforded the intermediate (1.046g, yield: 20.44%). <sup>1</sup>H

NMR (500 MHz, DMSO- $d_6$ ):  $\delta$ (ppm) 11.54 (s, 1H), 8.16 (d,  $J$  = 2.2 Hz, 1H), 8.00 (d,  $J$  = 2.2 Hz, 1H), 2.64 (q,  $J$  = 7.5 Hz, 2H), 1.13 (t,  $J$  = 7.5 Hz, 3H).

**b. 4-bromo-2-ethyl-6-nitroaniline:** N-(4-bromo-2-ethyl-6-nitrophenyl)-2,2,2-trifluoroacetamide (1.0232g, 3mmol, 1.0eq) was dissolved in 1,4-dioxane(3.6ml, 1.2ml/mmol) and added aqueous 6M NaOH(1.5ml, 0.5ml/mmol). The reaction mixture was stirred at reflux for 2 days.

The mixture was allowed to cool, diluted with EA, and washed with water, saturated aqueous  $\text{NH}_4\text{Cl}$ , water, brine, dried and concentrated. Purification by column chromatography (PE/EA) through silica gel afforded the intermediate (0.703g, yield: 95.61%).  $^1\text{H}$  NMR (500 MHz, DMSO- $d_6$ ):  $\delta$ (ppm) 8.00 (d,  $J$  = 2.2 Hz, 1H), 7.44 (s, 1H), 7.32 (s, 2H), 2.60 (q,  $J$  = 7.3 Hz, 2H), 1.15 (t,  $J$  = 7.4 Hz, 3H).

**c. 3-ethylbenzene-1,2-diamine:** To a solution of 4-bromo-2-ethyl-6-nitroaniline (0.703g, 2.8683mmol, 1.0eq) in MeOH/THF(4:1 volume/volume 35ml) was added 10% Pd/C (0.050g) followed by KOH(0.177g, 3.1551mmol, 1.1eq). The mixture was degassed and purged with hydrogen and stirred at rt overnight. The solution was filtered and concentrated. Purification by column chromatography (DCM/MeOH) through silica gel afforded the intermediate (0.365g, 2.1885mmol, yield:76.30%).  $^1\text{H}$  NMR (500 MHz, DMSO- $d_6$ ):  $\delta$ (ppm) 6.41 (dd,  $J$  = 7.3, 1.4 Hz, 1H), 6.33 (m, 2H), 4.25 (s, 4H), 2.43 (q,  $J$  = 7.5 Hz, 2H), 1.10 (t,  $J$  = 7.5 Hz, 3H).

**d. tert-butyl (2-amino-3-ethylphenyl)carbamate :** the title compound was synthesized following the procedure of compound 9. Yield: 59.38%.  $^1\text{H}$  NMR (400 MHz, DMSO- $d_6$ ):  $\delta$ (ppm) 8.23 (s, 1H), 7.01 (d,  $J$  = 7.7 Hz, 1H), 6.78 (d,  $J$  = 7.4 Hz, 1H), 6.50 (t,  $J$  = 7.7 Hz, 1H), 4.53 (s, 2H), 2.47 (q,  $J$  = 7.5 Hz, 2H), 1.45 (s, 9H), 1.12 (t,  $J$  = 7.5 Hz, 3H).

**N-(2-((5-((2,6-dichloro-3,5-dimethoxybenzyl)oxy)pyrimidin-2-yl)amino)-3-fluorophenyl)**

**acrylamide (2k)** was synthesized following the approach outlined in Scheme S1(Example 2 a) substituting 2-methyl-6-nitroaniline with 2-fluoro-6-nitroaniline.

$^1\text{H}$  NMR (400 MHz, DMSO- $d_6$ ):  $\delta$ (ppm) 9.70 (s, 1H), 8.25 (s, 2H), 8.24 (s, 1H), 7.71 (d,  $J$  = 8.3 Hz, 1H), 7.23 (td,  $J$  = 8.3, 6.1 Hz, 1H), 7.03 (dd,  $J$  = 13.5, 4.9 Hz, 1H), 7.00 (s, 1H), 6.56 (dd,  $J$  = 17.0, 10.2 Hz, 1H), 6.26 (dd,  $J$  = 17.0, 1.9 Hz, 1H), 5.75 (dd,  $J$  = 10.2, 1.9 Hz, 1H), 5.25 (s, 2H), 3.94 (s, 6H).  $^{13}\text{C}$  NMR (125 MHz, DMSO- $d_6$ ):  $\delta$ (ppm) 163.60, 159.29, 157.33, 156.45, 154.38, 146.83, 146.15, 135.74, 135.71, 132.32, 131.57, 127.31, 125.96, 125.88, 120.21, 120.09, 118.53, 114.74, 111.67, 111.51, 99.14, 67.03, 56.76. HRMS (ESI) calcd for  $\text{C}_{22}\text{H}_{19}\text{Cl}_2\text{FN}_4\text{O}_4$   $[\text{M}+\text{H}]^+$  : 493.08402; found 493.08402. HPLC purity=99.11%, Rt 6.51 min.

**N-(3-chloro-2-((5-((2,6-dichloro-3,5-dimethoxybenzyl)oxy)pyrimidin-2-yl)amino)phenyl)**

**acrylamide (2l)** was synthesized following the approach outlined in Scheme S1(Example 2 a) substituting tert-butyl (2-amino-3-methylphenyl)carbamate with tert-butyl (2-amino-3-chlorophenyl)carbamate (prepared by the method outlined below).

$^1\text{H}$  NMR (400 MHz, DMSO- $d_6$ ):  $\delta$ (ppm) 9.59 (s, 1H), 8.32 (s, 1H), 8.23 (s, 2H), 8.00 – 7.83 (m, 1H), 7.30 – 7.23 (m, 2H), 6.99 (s, 1H), 6.57 (dd,  $J$  = 17.0, 10.2 Hz, 1H), 6.24 (dd,  $J$  = 17.0, 1.9 Hz, 1H), 5.73 (dd,  $J$  = 10.2, 1.8 Hz, 1H), 5.24 (s, 2H), 3.92 (d,  $J$  = 12.5 Hz, 6H).  $^{13}\text{C}$  NMR (125 MHz, DMSO- $d_6$ ):  $\delta$ (ppm) 163.58, 156.69, 154.38, 146.68, 146.16, 137.03, 133.07, 132.30, 131.66, 129.21, 127.24, 126.79, 125.25, 121.51, 114.75, 99.14, 66.99, 56.76. HRMS (ESI) calcd for  $\text{C}_{22}\text{H}_{19}\text{Cl}_3\text{N}_4\text{O}_4$   $[\text{M}+\text{H}]^+$  : 509.05446; found 509.05487. HPLC purity=98.22%, Rt 7.45 min.

**Preparation of tert-butyl (2-amino-3-chlorophenyl)carbamate**

**a. 3-chlorobenzene-1,2-diamine**

A mixture of 3-chloro-2-nitroaniline (1.51g, 8.75mmol, 1.0eq), iron powder(1.9547g, 35mmol,



4.0eq) and ammonium chloride(2.8082g, 52.5mmol, 6.0eq) in MeOH/water(3;1 volume/volume, 3:1, 100ml) was heated at reflux temperature for 3h. After cooling, the catalyst was removed and the filtrate was concentrated. The residue was dissolved with EA and washed with water, brine, dried and concentrated. Purification by column chromatography (PE/EA) through silica gel afforded the intermediate (0.8557g, yield: 68.59%). <sup>1</sup>H NMR (400 MHz, DMSO-d<sub>6</sub>): δ(ppm) 6.51-6.46 (m, 2H), 6.38 (t, *J* = 7.8 Hz, 1H), 4.80 (s, 2H), 4.60 (s, 2H).

**b. tert-butyl (2-amino-3-chlorophenyl)carbamate (compound 10)**

The title compound was synthesized following the procedure of compound 9 in Scheme S1 substituting 3-chlorobenzene-1,2-diamine. <sup>1</sup>H NMR (400 MHz, DMSO-d<sub>6</sub>): δ(ppm)8.47 (s, 1H), 7.20 (d, *J* = 7.8 Hz, 1H), 7.03 (dd, *J* = 8.0, 1.2 Hz, 1H), 6.56 (t, *J* = 8.0 Hz, 1H), 5.00 (s, 2H), 1.46 (s, 9H).

**Scheme S3. Synthesis of compound 2m**

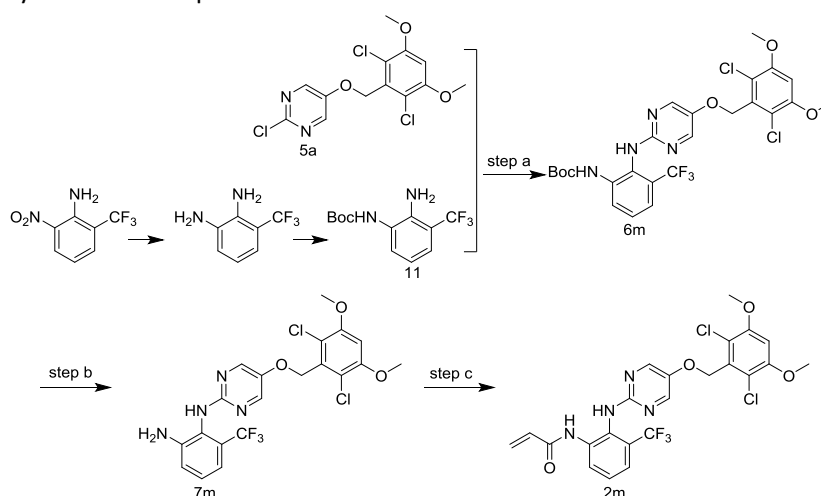

**Preparation of tert-butyl (2-amino-3-(trifluoromethyl)phenyl)carbamate (11):**

**a. 3-(trifluoromethyl)benzene-1,2-diamine**

the title compound was synthesized following the procedure of compound 8 in Scheme S1 substituting 2-methyl-6-nitroaniline with 2-nitro-6-(trifluoromethyl)aniline. <sup>1</sup>H NMR (400 MHz, DMSO-d<sub>6</sub>): δ(ppm) 6.74 (d, *J* = 7.6 Hz, 1H), 6.67 (dd, *J* = 7.9, 1.1 Hz, 1H), 6.49 (t, *J* = 7.8 Hz, 1H), 4.90 (s, 2H), 4.79 (s, 2H).

**b. tert-butyl (2-amino-3-(trifluoromethyl)phenyl)carbamate (compound 11)**

To a solution of 3-(trifluoromethyl)benzene-1,2-diamine (0.1761g, 1.0mmol, 1.0eq) dry THF(2.8ml, 2.8ml/mmol) containing DIEA(0.1258g, 1.0mmol, 1.0eq) was added Boc<sub>2</sub>O (0.2162g, 1.0mmol, 1.0eq) and the mixture was heated to reflux overnight. The solution was then cooled, concentrated under reduced pressure, diluted with saturated aqueous EA, and washed brine, dried and concentrated. Purification by column chromatography (PE/EA) through silica gel afforded the intermediate (0.21g, yield: 76.05%). <sup>1</sup>H NMR (400 MHz, DMSO-d<sub>6</sub>): δ(ppm) 8.49 (s, 1H), 7.40 (d, *J* = 7.8 Hz, 1H), 7.21 (d, *J* = 7.7 Hz, 1H), 6.67 (t, *J* = 7.9 Hz, 1H), 5.16 (s, 2H), 1.46 (s, 9H).

**tert-butyl (2-((5-((2,6-dichloro-3,5-dimethoxybenzyloxy)pyrimidin-2-yl)amino)-3-(trifluoromethyl)phenyl)carbamate (6m):**

To a solution of compound 11 (0.0607g, 0.22mmol, 1.1eq), compound 5a (0.070g, 1.0mmol, 1.0eq) and Na<sub>2</sub>CO<sub>3</sub> (0.0848g, 0.8mmol, 4.0eq) in tert-amyl alcohol (0.2ml, 10ml/mmol), was

added tris-dibenzylamino dipalladium(0.0274g, 0.03mmol, 0.15eq) and Dave Phos(0.0236g, 0.06mmol, 0.3eq). The mixture was degassed and purged again with argon, then heated at 100 °C overnight. After cooling, the solvent was evaporated under reduced pressure. The residue was dissolved in DCM and filtered. The filtrate was concentrated. Purification by column chromatography(PE/EA) through silica gel afforded the intermediate (0.0280g, yield: 22.76%). <sup>1</sup>H NMR (400 MHz, DMSO-d<sub>6</sub>): δ(ppm) 8.22 (s, 1H), 8.13 (s, 1H), 8.12 (s, 1H), 8.04-8.02 (m, 1H), 7.47-7.45 (m, 2H), 6.99 (m, 1H), 5.23 (s, 2H), 3.94 (s, 6H), 1.40 (s, 9H).

**N<sup>1</sup>-(5-((2,6-dichloro-3,5-dimethoxybenzyl)oxy)pyrimidin-2-yl)-6-(trifluoromethyl)benzene-1,2-diamine (7m):**

The title compound was synthesized following the procedure of 7a in Scheme S1 substituting 6a with 6m. <sup>1</sup>H NMR (500 MHz, DMSO-d<sub>6</sub>): δ(ppm) 8.18 (s, 2H), 8.15 (s, 1H), 7.14 (t, *J* = 7.9 Hz, 1H), 7.00 (d, *J* = 6.3 Hz, 2H), 6.85 (d, *J* = 7.2 Hz, 1H), 5.21 (s, 2H), 3.96 (s, 6H).

**N-(2-((5-((2,6-dichloro-3,5-dimethoxybenzyl)oxy)pyrimidin-2-yl)amino)-3-(trifluoromethyl)phenyl)acrylamide (2m):**

The title compound was synthesized following the procedure of 2a in Scheme S1 substituting 7a with 7m.

<sup>1</sup>H NMR (400 MHz, DMSO-d<sub>6</sub>): δ(ppm) 9.45 (s, 1H), 8.23 (d, *J* = 7.6 Hz, 1H), 8.19 (s, 2H), 8.09 (s, 1H), 7.55-7.47 (m, 2H), 6.99 (s, 1H), 6.50 (dd, *J* = 17.0, 10.2 Hz, 1H), 6.19 (dd, *J* = 17.0, 1.8 Hz, 1H), 5.70 (dd, *J* = 10.2, 1.8 Hz, 1H), 5.22 (s, 2H), 3.94 (s, 6H). <sup>13</sup>C NMR (125 MHz, DMSO-d<sub>6</sub>): δ(ppm) 163.57, 157.49, 154.38, 146.67, 146.08, 138.11, 132.29, 131.53, 129.81, 128.59, 128.36, 127.27, 127.10, 124.66, 122.49, 122.26, 114.74, 99.16, 66.95, 56.76. HRMS (ESI) calcd for C<sub>23</sub>H<sub>19</sub>Cl<sub>2</sub>F<sub>3</sub>N<sub>4</sub>O<sub>4</sub> [M+H]<sup>+</sup>: 543.08082; found 543.08068. HPLC purity=96.34%, Rt 7.06 min.

**N-(3-chloro-2-((5-((2,6-dichloro-3,5-dimethoxybenzyl)oxy)pyrimidin-2-yl)amino)-5-fluorophenyl)acrylamide (2n)** was synthesized following the approach outlined in Scheme S3 substituting compound 11 with tert-butyl (2-amino-3-chloro-5-fluorophenyl)carbamate (prepared according to the procedure of compound 10 with 2-chloro-4-fluoro-6-nitroaniline which was prepared by the method outlined below).

<sup>1</sup>H NMR (400 MHz, DMSO-d<sub>6</sub>): δ(ppm) 9.63 (s, 1H), 8.34 (s, 1H), 8.24 (s, 2H), 8.02 (dd, *J* = 11.1, 2.8 Hz, 1H), 7.25 (dd, *J* = 8.2, 2.9 Hz, 1H), 7.00 (s, 1H), 6.65 (dd, *J* = 16.9, 10.2 Hz, 1H), 6.25 (dd, *J* = 17.0, 1.5 Hz, 1H), 5.75 (dd, *J* = 17.0, 1.5 Hz, 1H), 5.24 (s, 2H), 3.94 (s, 6H). <sup>13</sup>C NMR (125 MHz, DMSO-d<sub>6</sub>): δ(ppm) 163.84, 160.20, 158.27, 156.94, 154.38, 146.74, 146.15, 138.71, 138.60, 134.15, 134.05, 132.29, 131.58, 127.72, 125.07, 114.76, 111.79, 111.58, 107.56, 107.35, 99.17, 66.96, 56.76. HRMS (ESI) calcd for C<sub>22</sub>H<sub>18</sub>Cl<sub>3</sub>F<sub>2</sub>N<sub>4</sub>O<sub>4</sub> [M+H]<sup>+</sup>: 527.04504; found 527.04544. HPLC purity=99.02%, Rt 8.90 min.

**Preparation of 2-chloro-4-fluoro-6-nitroaniline**

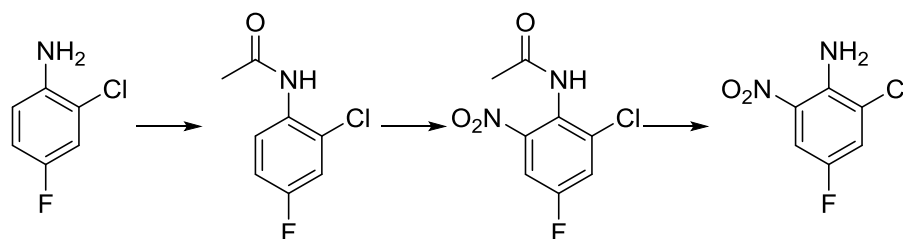

**a. N-(2-chloro-4-fluorophenyl)acetamide**

Acetic anhydride (20ml) was slowly added to 2-chloro-4-fluoroaniline (4.2212g, 29mmol) at 0 °C. The mixture was then stirred at 100 °C for 1h. After that, the reaction was poured into ice

water and extracted with EA. The organic phase was concentrated under reduced pressure. The crude product was purified by flash column chromatography on silica gel eluting with EA/PE afforded the desired product (2.801g, yield: 43.29%). <sup>1</sup>H NMR (400 MHz, DMSO-d<sub>6</sub>): δ(ppm) 8.68 (s, 2H), 7.02 (s, 1H), 5.42 (s, 2H), 3.95 (s, 6H).

**b. N-(2-chloro-4-fluoro-6-nitrophenyl)acetamide**

To a solution of N-(2-chloro-4-fluorophenyl)acetamide (2.801g, 14.9339mmol) in acetic acid (2.9ml) and conc. H<sub>2</sub>SO<sub>4</sub> (9.8ml) was drop-wise added a mixture of nitric acid (fuming, 1.31ml) and acetic acid (0.33ml) at 0°C. The mixture was stirred at 0°C for 1.5h. After that, the mixture was poured into ice water and stirred. Then, the mixture was filtered, and the cake was washed with water for several times (2.58g, yield: 74.39%) <sup>1</sup>H NMR (400 MHz, DMSO-d<sub>6</sub>): δ(ppm) 10.19 (s, 1H), 7.99 (dd, *J* = 19.3, 7.4 Hz, 2H), 2.05 (s, 3H).

**c. 2-chloro-4-fluoro-6-nitroaniline**

Conc. HCl (30ml) was slowly added to b. N-(2-chloro-4-fluoro-6-nitrophenyl)acetamide (2.58g, 11.11 mmol) at room temperature. The mixture was then stirred at 120°C for 1.25h. After that, the reaction was poured into ice water and extracted with EA. The organic phase was concentrated under reduced pressure. The crude product was purified by flash column chromatography on silica gel eluting with EA/PE afforded the desired product (1.9404g, yield: 90.0%). <sup>1</sup>H NMR (400 MHz, DMSO-d<sub>6</sub>): δ(ppm) 7.88 (s, 1H), 7.86 (s, 1H), 7.21 (s, 2H).

**N-(3,5-dichloro-2-((5-((2,6-dichloro-3,5-dimethoxybenzyl)oxy)pyrimidin-2-yl)amino)phenyl)acrylamide (2o)** was synthesized following the approach outlined in Scheme S3 substituting compound 11 with tert-butyl (2-amino-3,5-dichlorophenyl)carbamate (prepared according to the procedure of tert-butyl (2-amino-3-chlorophenyl)carbamate in compound 2l with 3,5-dichlorobenzene-1,2-diamine).

<sup>1</sup>H NMR (400 MHz, DMSO-d<sub>6</sub>): δ(ppm) 9.65 (s, 1H), 8.44 (s, 1H), 8.24 (s, 2H), 8.17 (d, *J* = 2.4 Hz, 1H), 7.42 (d, *J* = 2.4 Hz, 1H), 6.99 (s, 1H), 6.62 (dd, *J* = 17.0, 10.2 Hz, 1H), 6.25 (dd, *J* = 17.0, 1.8 Hz, 1H), 5.76 (dd, *J* = 10.4, 1.8 Hz, 1H), 5.24 (s, 2H), 3.94 (s, 6H). <sup>13</sup>C NMR (125 MHz, DMSO-d<sub>6</sub>): δ(ppm) 163.82, 156.60, 154.38, 146.83, 146.13, 138.22, 134.10, 132.28, 131.46, 130.35, 127.88, 127.79, 124.18, 120.54, 114.75, 99.15, 66.96, 56.77. HRMS (ESI) calcd for C<sub>22</sub>H<sub>18</sub>Cl<sub>4</sub>N<sub>4</sub>O<sub>4</sub> [M+H]<sup>+</sup> : 545.01281; found 545.01328. HPLC purity=95.94%, Rt 10.93 min.

**N-(3-chloro-2-((5-((2,6-dichloro-3,5-dimethoxybenzyl)oxy)pyrimidin-2-yl)amino)-5-(trifluoromethyl)phenyl)acrylamide (2p)** was synthesized following the approach outlined in Scheme S3 substituting 3-(trifluoromethyl)benzene-1,2-diamine in with 3-chloro-5-(trifluoromethyl)benzene-1,2-diamine).

<sup>1</sup>H NMR (500 MHz, DMSO-d<sub>6</sub>): δ(ppm) 9.81 (s, 1H), 8.72 (s, 1H), 8.43 (s, 1H), 8.27 (s, 2H), 7.67 (s, 1H), 7.00 (s, 1H), 6.62 (dd, *J* = 17.0, 10.2 Hz, 1H), 6.27 (d, *J* = 17.0 Hz, 1H), 5.78 (d, *J* = 10.4 Hz, 1H), 5.25 (s, 2H), 3.94 (s, 6H). <sup>13</sup>C NMR (125 MHz, DMSO-d<sub>6</sub>): δ(ppm) 164.01, 156.11, 154.39, 147.04, 146.13, 137.61, 133.77, 132.55, 132.24, 131.37, 127.93, 126.98, 126.72, 124.46, 122.29, 121.52, 117.66, 114.75, 99.16, 66.97, 56.77. HRMS (ESI) calcd for C<sub>23</sub>H<sub>18</sub><sup>35</sup>Cl<sub>3</sub>F<sub>3</sub>N<sub>4</sub>O<sub>4</sub> [M+H]<sup>+</sup> : 577.04185; found 577.04228. HPLC purity=96.74%, Rt 10.46 min.

**Scheme S4. Synthesis of compound 2h**

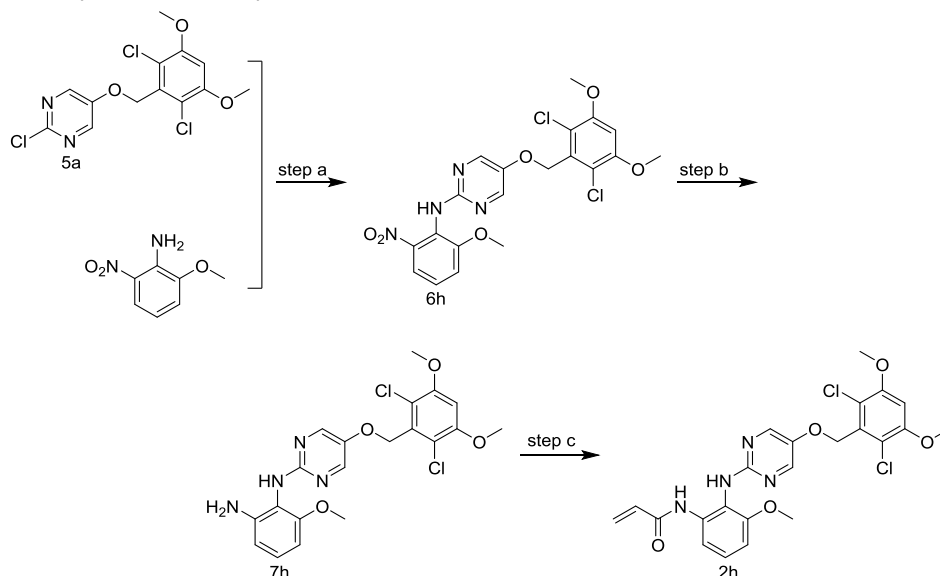

**5-((2,6-dichloro-3,5-dimethoxybenzyl)oxy)-N-(2-methoxy-6-nitrophenyl)pyrimidin-2-amine (6h):**

The title compound was synthesized following the procedure of 6a in Scheme S1 with compound 5a and 2-methoxy-6-nitroaniline. <sup>1</sup>H NMR (400 MHz, DMSO-*d*<sub>6</sub>): δ(ppm) 8.70 (s, 1H), 8.23 (s, 2H), 7.50 (dd, *J* = 8.2, 1.2 Hz, 1H), 7.39 (dd, *J* = 8.3, 1.2 Hz, 1H), 7.31 (t, *J* = 8.2 Hz, 1H), 6.99 (s, 1H), 5.25 (s, 2H), 3.94 (s, 6H), 3.85 (s, 3H).

**N<sup>1</sup>-(5-((2,6-dichloro-3,5-dimethoxybenzyl)oxy)pyrimidin-2-yl)-6-methoxybenzene-1,2-diamine (7h):** To a solution of compound 6h (0.4144g, 0.8611mmol, 1.0eq) and NiCl<sub>2</sub> • 6H<sub>2</sub>O (0.3070g, 1.2965mmol, 1.5eq) in MeOH/DCM (1:4, volume/volume, 7ml) was added NaBH<sub>4</sub> (0.0831g, 2.1527mmol, 2.5eq) in portions at 0°C. The ice-bath was removed, and the resulting mixture was stirred at room temperature for 1.5h. The mixture was filtered, and the filtrate was evaporated to dryness under reduced pressure. The crude product was purified by flash column chromatography on silica gel eluting with DCM/MeOH afforded the desired product (0.1930g, yield: 49.65%). <sup>1</sup>H NMR (400 MHz, DMSO-*d*<sub>6</sub>): δ(ppm) 8.14 (s, 2H), 7.66 (s, 1H), 6.99 (s, 1H), 6.89 (t, *J* = 8.1 Hz, 1H), 6.35 (d, *J* = 7.4 Hz, 1H), 6.22 (d, *J* = 7.6 Hz, 1H), 5.22 (s, 2H), 4.71 (s, 2H), 3.95 (s, 6H), 3.60 (s, 3H).

**N-(2-((5-((2,6-dichloro-3,5-dimethoxybenzyl)oxy)pyrimidin-2-yl)amino)-3-methoxyphenyl)acrylamide (2h):** the title compound was synthesized following the procedure of 2a in Scheme S1 with compound 7h.

<sup>1</sup>H NMR (400 MHz, DMSO-*d*<sub>6</sub>): δ(ppm) 9.42 (s, 1H), 8.17 (s, 2H), 7.80 (s, 1H), 7.52 (d, *J* = 8.1 Hz, 1H), 7.18 (t, *J* = 8.3 Hz, 1H), 6.98 (s, 1H), 6.85 (d, *J* = 8.4 Hz, 1H), 6.53 (dd, *J* = 17.0, 10.2 Hz, 1H), 6.21 (dd, *J* = 17.0, 1.9 Hz, 1H), 5.70 (dd, *J* = 10.2, 1.9 Hz, 1H), 5.23 (s, 2H), 3.93 (s, 6H), 3.67 (s, 3H). <sup>13</sup>C NMR (125 MHz, DMSO-*d*<sub>6</sub>): δ(ppm) 163.33, 157.33, 155.69, 154.37, 146.35, 146.22, 135.53, 132.39, 131.95, 126.76, 125.94, 120.62, 114.74, 107.96, 99.11, 67.15, 56.76, 55.62. HRMS (ESI) calcd for C<sub>23</sub>H<sub>22</sub>Cl<sub>2</sub>N<sub>4</sub>O<sub>5</sub> [M+H]<sup>+</sup>: 505.10400; found 505.10433. HPLC purity=95.27%, Rt 6.63 min.

**N-(2-((5-((2,6-dichloro-3,5-dimethoxybenzyl)oxy)pyrimidin-2-yl)amino)-3-ethoxyphenyl)acrylamide (2i)** was synthesized following the approach outlined in Scheme S4 substituting 2-methoxy-6-nitroaniline with 2-ethoxy-6-nitroaniline (prepared by the method outlined below.). <sup>1</sup>H NMR (400 MHz, DMSO-*d*<sub>6</sub>): δ(ppm) 9.46 (s, 1H), 8.18 (s, 2H), 7.74 (s, 1H), 7.49 (d, *J* = 8.1 Hz,

1H), 7.14 (t,  $J = 8.2$  Hz, 1H), 6.99 (s, 1H), 6.81 (d,  $J = 7.7$  Hz, 1H), 6.55 (dd,  $J = 16.9, 10.2$  Hz, 1H), 6.22 (dd,  $J = 17.0, 1.9$  Hz, 1H), 5.71 (dd,  $J = 10.2, 1.8$  Hz, 1H), 5.24 (s, 2H), 3.98 – 3.82 (m, 8H), 1.05 (t,  $J = 6.9$  Hz, 3H).  $^{13}\text{C}$  NMR (125 MHz, DMSO- $d_6$ ):  $\delta$ (ppm) 163.31, 157.40, 154.83, 154.36, 146.39, 146.16, 135.28, 132.42, 131.95, 126.75, 125.69, 121.05, 114.69, 109.03, 99.07, 67.27, 63.53, 56.74, 14.43. HRMS (ESI) calcd for  $\text{C}_{24}\text{H}_{24}\text{Cl}_2\text{N}_4\text{O}_5$   $[\text{M}+\text{H}]^+$  : 519.11965; found 519.12003. HPLC purity=97.02%, Rt 7.48 min.

#### Preparation of 2-ethoxy-6-nitroaniline

To a solution of 2-amino-3-nitrophenol (1.2329g, 8mmol, 1.0eq) in DMF (6.4ml, 0.8ml/mmol) at room temperature was added  $\text{K}_2\text{CO}_3$  (1.2162g, 8.8mmol, 1.1eq) and iodoethane (1.3728g, 8.8mmol, 1.1eq). The reaction mixture was stirred overnight, then the solvent was removed in vacuo. The residue was diluted with  $\text{NH}_4\text{Cl}$  (saturated) and extract EA, and the extract was washed water, brine and dried and concentrated. Purification by column chromatography (PE/EA) through silica gel afforded the intermediate (1.2752g, yield: 87.5%).  $^1\text{H}$  NMR (400 MHz, DMSO- $d_6$ ):  $\delta$ (ppm) 7.63 – 7.53 (m, 1H), 7.07 (d,  $J = 7.7$  Hz, 1H), 6.99 (s, 2H), 6.65 – 6.52 (m, 1H), 4.11 (q,  $J = 6.9$  Hz, 2H), 1.39 (t,  $J = 7.0$  Hz, 3H).

**N-(2-((5-((2,6-dichloro-3,5-dimethoxybenzyl)oxy)pyrimidin-2-yl)amino)-3-isopropoxyphenyl)acrylamide (2j)** was synthesized following the approach outlined in Scheme S4 substituting 2-methoxy-6-nitroaniline with 2-isopropoxy-6-nitroaniline (prepared according to the procedure of 2-ethoxy-6-nitroaniline).

$^1\text{H}$  NMR (500 MHz, DMSO- $d_6$ ):  $\delta$ (ppm) 9.43 (s, 1H), 8.17 (s, 2H), 7.67 (s, 1H), 7.50 (d,  $J = 8.1$  Hz, 1H), 7.13 (t,  $J = 8.2$  Hz, 1H), 6.98 (s, 1H), 6.80 (d,  $J = 7.9$  Hz, 1H), 6.56 (dd,  $J = 17.0, 10.2$  Hz, 1H), 6.22 (dd,  $J = 17.0, 1.8$  Hz, 1H), 5.70 (dd,  $J = 10.2, 1.8$  Hz, 1H), 5.24 (s, 2H), 4.49-4.44 (m, 1H), 3.93 (s, 6H), 1.04 (d,  $J = 6.0$  Hz, 6H).  $^{13}\text{C}$  NMR (125 MHz, DMSO- $d_6$ ):  $\delta$ (ppm) 163.28, 157.58, 154.35, 153.73, 146.38, 146.24, 135.70, 132.43, 132.00, 126.69, 125.66, 121.68, 114.68, 114.35, 110.14, 99.03, 69.75, 67.35, 56.72, 21.68. HRMS (ESI) calcd for  $\text{C}_{25}\text{H}_{26}\text{Cl}_2\text{N}_4\text{O}_5$   $[\text{M}+\text{H}]^+$  : 533.13530; found 533.13497. HPLC purity=95.98%, Rt 8.40 min.

#### **N-(3-chloro-2-((5-(1-(2,6-dichloro-3,5-dimethoxyphenyl)ethoxy)pyrimidin-2-yl)amino)phenyl)Propionamide (2q):**

To a solution of compound 6l (see compound 2l) (0.3645g, 0.7998mmol, 1.0eq) in dry DCM (6.4ml, 8ml/mmol) containing DIEA (0.1547g, 1.2mmol, 1.5eq) was added propionyl chloride (0.0884g, 0.96mmol, 1.2eq) drop-wise at  $0^\circ\text{C}$ . The mixture was stirred at  $0^\circ\text{C}$  for 3h. Then water was added and diluted with DCM. The organic layer was wash with brine, dried and concentrated. Purification by column chromatography (DCM/MeOH) through silica gel afforded the desired product (0.2g, yield: 48.85%).

$^1\text{H}$  NMR (400 MHz, DMSO- $d_6$ ):  $\delta$ (ppm): 9.31 (s, 1H), 8.29 (s, 1H), 8.23 (s, 2H), 7.81 (d,  $J = 7.0$  Hz, 1H), 7.34 – 7.15 (m, 2H), 6.99 (s, 1H), 5.24 (s, 2H), 3.94 (s, 6H), 2.31 (q,  $J = 7.5$  Hz, 2H), 1.00 (t,  $J = 7.5$  Hz, 3H).  $^{13}\text{C}$  NMR (125 MHz, DMSO- $d_6$ ):  $\delta$ (ppm): 172.39, 156.64, 154.39, 146.66, 146.24, 137.14, 132.92, 132.31, 129.00, 126.70, 124.88, 121.48, 114.75, 99.11, 67.04, 56.76, 29.27, 9.60.  $^{13}\text{C}$  NMR (125 MHz, DMSO- $d_6$ ):  $\delta$ (ppm) 172.39, 156.64, 154.39, 146.66, 146.24, 137.14, 132.92, 132.31, 129.00, 126.70, 124.88, 121.48, 114.75, 99.11, 67.04, 56.76, 29.27, 9.60. HRMS (ESI) calcd for  $\text{C}_{22}\text{H}_{21}\text{Cl}_3\text{N}_4\text{O}_4$   $[\text{M}+\text{H}]^+$  : 511.07012; found 511.07033. HPLC purity=99.06%, Rt 7.92min.

### Scheme S5. Synthesis of compound 2r

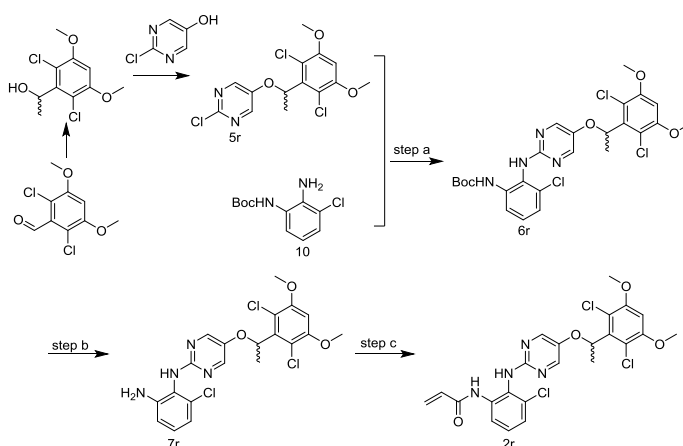

#### Preparation of 2-chloro-5-(1-(2,6-dichloro-3,5-dimethoxyphenyl)ethoxy)pyrimidine (5r):

##### a. 1-(2,6-dichloro-3,5-dimethoxyphenyl)ethan-1-ol

Under an atmosphere of argon, a solution of methylmagnesium bromide (1.3ml, 1.5eq, 1M) was added to a solution of 2,6-dichloro-3,5-dimethoxybenzaldehyde (prepared according to the procedure reported in Synthetic Communication, 30(12), 2133-2141; 2000) (0.2077g, 0.8838mmol, 1.0eq) in anhydrous THF (1.5ml, 1.7ml/mmol) at 0°C. The ice bath was removed, and the reaction was stirred for 2h. The reaction was quenched with a solution of saturated aqueous ammonium chloride. The organic layer was washed with brine, dried over Na<sub>2</sub>SO<sub>4</sub>, and filtered. The solvent was removed in vacuo. Column chromatography (PE/EA) afforded the intermediate alcohol (0.171g, yield: 77.08%). <sup>1</sup>H NMR (400 MHz, DMSO-d<sub>6</sub>): δ(ppm) 6.82 (s, 1H), 5.50 (qd, *J* = 6.8, 4.8 Hz, 1H), 5.24 (d, *J* = 4.7 Hz, 1H), 3.90 (d, *J* = 7.1 Hz, 6H), 1.44 (d, *J* = 6.8 Hz, 3H).

##### b. 2-chloro-5-(1-(2,6-dichloro-3,5-dimethoxyphenyl)ethoxy)pyrimidine (5r)

To a solution of triphenylphosphine (1.0765g, 4.104mmol, 6.0eq) in dry THF (13.5ml, 3.3ml/mmol) at 0°C was added drop-wise DIAD (0.8298g, 4.104mmol, 6.0eq). The suspension was stirred at 0°C for 15 min. A solution of 1-(2,6-dichloro-3,5-dimethoxyphenyl)ethan-1-ol (0.171g, 0.6840mmol, 1.0eq) in THF (3.67ml, 5.36ml/mmol) was added drop-wise, followed by 2-chloropyrimidin-5-ol (0.3571g, 2.736mmol, 4.0eq) as a solid. The ice-bath was removed and the mixture stirred at rt overnight. 1M NaOH (2.8ml) and water (6ml) were added and the mixture was extracted with ethyl acetate. The organic phase was washed with brine, dried, and concentrated. Purification by column chromatography (PE/EA) through silica gel afforded the desired product (0.1271g, yield: 51.12%). <sup>1</sup>H NMR (400 MHz, DMSO-d<sub>6</sub>): δ(ppm) 8.29 (s, 2H), 6.89 (s, 1H), 6.25 (q, *J* = 6.6 Hz, 1H), 3.89 (s, 6H), 1.74 (d, *J* = 6.6 Hz, 3H).

##### tert-butyl (3-chloro-2-((5-(1-(2,6-dichloro-3,5-dimethoxyphenyl)ethoxy)pyrimidin-2-yl)amino)phenyl)carbamate (6r):

The title compound was synthesized following the procedure of compound 6a in Scheme S1 with compound 5r and compound 10. <sup>1</sup>H NMR (400 MHz, DMSO-d<sub>6</sub>): δ(ppm) 8.32 (s, 1H), 8.30 (s, 1H), 7.94 (s, 2H), 7.71 (dd, *J* = 7.8, 1.4 Hz, 1H), 7.28 – 7.07 (m, 2H), 6.86 (s, 1H), 6.01 (q, *J* = 6.6 Hz, 1H), 3.88 (s, 6H), 1.69 (d, *J* = 6.6 Hz, 3H), 1.40 (s, 9H).

##### 6-chloro-N1-(5-(1-(2,6-dichloro-3,5-dimethoxyphenyl)ethoxy)pyrimidin-2-yl)benzene-1,2-diamine (7r):

The title compound was synthesized following the procedure of compound 7a in Scheme S1 with

compound 6r. <sup>1</sup>H NMR (400 MHz, DMSO-d<sub>6</sub>): δ(ppm) 8.13 (s, 1H), 7.91 (s, 2H), 6.91 (t, *J* = 8.0 Hz, 1H), 6.86 (s, 1H), 6.63 (dd, *J* = 8.1, 1.2 Hz, 1H), 6.58 (dd, *J* = 7.9, 1.2 Hz, 1H), 5.99 (q, *J* = 6.6 Hz, 1H), 5.03 (s, 2H), 3.89 (s, 6H), 1.68 (d, *J* = 6.6 Hz, 3H).

**N-(3-chloro-2-((5-(1-(2,6-dichloro-3,5-dimethoxyphenyl)ethoxy)pyrimidin-2-yl)amino)phenyl)Acrylamide (2r):**

The title compound was synthesized following the procedure of compound 2a in Scheme S1 with compound 7r.

<sup>1</sup>H NMR (400 MHz, DMSO-d<sub>6</sub>): δ(ppm) 9.55 (s, 1H), 8.28 (s, 1H), 7.94 (s, 2H), 7.89 (dd, *J* = 7.2, 1.9 Hz, 1H), 7.29 – 7.13 (m, 2H), 6.86 (s, 1H), 6.52 (dd, *J* = 17.0, 10.2 Hz, 1H), 6.20 (dd, *J* = 17.0, 1.8 Hz, 1H), 6.01 (q, *J* = 6.5 Hz, 1H), 5.69 (dd, *J* = 10.2, 1.7 Hz, 1H), 3.89 (s, 6H), 1.69 (d, *J* = 6.6 Hz, 3H). <sup>13</sup>C NMR (125 MHz, DMSO-d<sub>6</sub>): δ(ppm) 163.55, 156.37, 154.57, 145.95, 144.99, 136.91, 135.38, 132.83, 131.63, 129.08, 127.10, 126.69, 125.23, 121.55, 112.39, 98.08, 74.02, 56.63. HRMS (ESI) calcd for C<sub>23</sub>H<sub>21</sub>Cl<sub>3</sub>N<sub>4</sub>O<sub>4</sub> [M+H]<sup>+</sup>: 523.07012; found 523.06996. HPLC purity=98.79%, Rt 9.72min.

**Scheme S6. Synthesis of compound 2s**

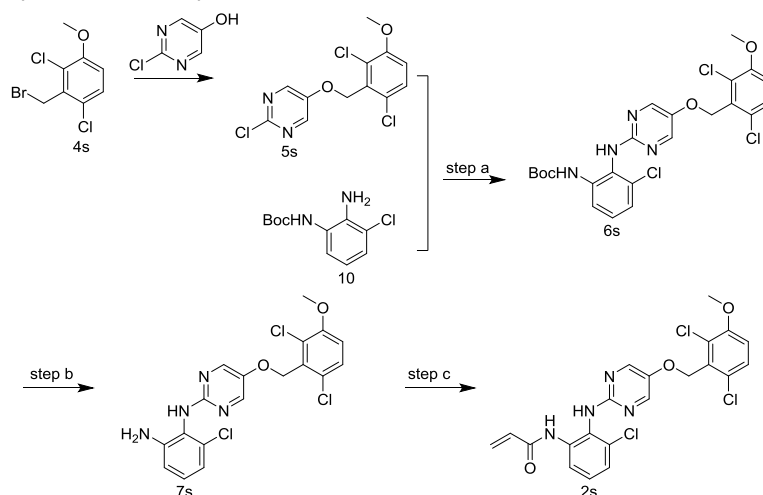

**2-chloro-5-((2,6-dichloro-3-methoxybenzyl)oxy)pyrimidine (5s):**

The title compound was synthesized following the procedure of compound 5a in Scheme S1 substituting 2-(bromomethyl)-1,3-dichloro-4-methoxybenzene (prepared by the according to the procedure in WO 2006049952).

<sup>1</sup>H NMR (400 MHz, DMSO-d<sub>6</sub>): δ(ppm) 8.70 (s, 2H), 7.55 (d, *J* = 9.0 Hz, 1H), 7.30 (d, *J* = 9.0 Hz, 1H), 5.42 (s, 2H), 3.90 (s, 3H).

**tert-butyl (2-((5-((2,6-dichloro-3-methoxybenzyl)oxy)pyrimidin-2-yl)amino)-3-methylphenyl) carbamate (6s):**

The title compound was synthesized following the procedure of compound 6a in Scheme S1 with compound 10 and compound 5s.

<sup>1</sup>H NMR (400 MHz, DMSO-d<sub>6</sub>): δ(ppm) 8.40 (s, 1H), 8.34 (s, 1H), 8.26 (s, 2H), 7.76 (dd, *J* = 7.6, 1.9 Hz, 1H), 7.51 (d, *J* = 9.0 Hz, 1H), 7.26 (d, *J* = 9.0 Hz, 1H), 7.23-7.18 (m, 2H), 5.24 (s, 2H), 3.89 (s, 3H), 1.44 (s, 9H).

**6-chloro-N<sup>1</sup>-(5-((2,6-dichloro-3-methoxybenzyl)oxy)pyrimidin-2-yl)benzene-1,2-diamine (7s):**

The title compound was synthesized following the procedure of compound 7a in Scheme S1 with compound 6s.

<sup>1</sup>H NMR (400 MHz, DMSO-d<sub>6</sub>): δ(ppm) 8.21 (d, *J* = 4.3 Hz, 3H), 7.51 (d, *J* = 9.0 Hz, 1H), 7.25 (d, *J* =

9.0 Hz, 1H), 6.93 (t,  $J$  = 8.0 Hz, 1H), 6.67 (dd,  $J$  = 8.1, 1.3 Hz, 1H), 6.62 (dd,  $J$  = 7.9, 1.3 Hz, 1H), 5.22 (s, 2H), 5.08 (s, 2H), 3.89 (s, 3H).

**N-(3-chloro-2-((5-((2,6-dichloro-3-methoxybenzyl)oxy)pyrimidin-2-yl)amino)phenyl)acrylamide (2s):**

The title compound was synthesized following the procedure of compound 2a in Scheme S1 with compound 7s.

$^1\text{H}$  NMR (400 MHz, DMSO- $d_6$ ):  $\delta$ (ppm) 9.61 (s, 1H), 8.35 (s, 1H), 8.25 (s, 2H), 7.93 (dd,  $J$  = 7.7, 1.7 Hz, 1H), 7.51 (d,  $J$  = 9.0 Hz, 1H), 7.35 – 7.20 (m, 3H), 6.58 (dd,  $J$  = 17.0, 10.2 Hz, 1H), 6.24 (dd,  $J$  = 17.0, 1.9 Hz, 1H), 5.73 (dd,  $J$  = 10.2, 1.9 Hz, 1H), 5.23 (s, 2H), 3.89 (s, 3H).  $^{13}\text{C}$  NMR (125 MHz, DMSO- $d_6$ ):  $\delta$ (ppm) 163.57, 156.71, 154.04, 146.66, 146.19, 137.02, 133.07, 132.05, 131.66, 129.20, 128.56, 127.24, 126.80, 126.33, 125.25, 124.21, 121.51, 114.33, 67.02, 56.64. HRMS (ESI) calcd for  $\text{C}_{21}\text{H}_{17}\text{Cl}_3\text{N}_4\text{O}_3$   $[\text{M}+\text{H}]^+$  : 479.04390; found 479.04415. HPLC purity=95.61%, Rt 7.52 min.

**N-(3-chloro-2-((5-((2-chloro-3,5-dimethoxybenzyl)oxy)pyrimidin-2-yl)amino)phenyl)acrylamide (2t)** was synthesized following the approach outlined in Scheme S6 (example 2s) with modified procedure of step b (as shown below) starting with 1-(bromomethyl)-2-chloro-3,5-dimethoxybenzene (prepared according to the procedure reported in Journal of Chemistry, 78 (9), 420-4626; 2013).

$^1\text{H}$  NMR (500 MHz, DMSO- $d_6$ ):  $\delta$ (ppm) 9.59 (s, 1H), 8.30 (s, 1H), 8.22 (s, 2H), 7.92 (d,  $J$  = 7.3 Hz, 1H), 7.32 – 7.15 (m, 2H), 6.76 (d,  $J$  = 2.6 Hz, 1H), 6.72 (d,  $J$  = 2.6 Hz, 1H), 6.56 (dd,  $J$  = 17.0, 10.2 Hz, 1H), 6.23 (dd,  $J$  = 17.0, 1.7 Hz, 1H), 5.73 (dd,  $J$  = 10.2, 1.6 Hz, 1H), 5.10 (s, 2H), 3.86 (s, 3H), 3.78 (s, 3H).  $^{13}\text{C}$  NMR (125 MHz, DMSO- $d_6$ ):  $\delta$ (ppm) 163.57, 158.79, 156.52, 155.56, 146.43, 146.08, 137.00, 135.53, 133.03, 131.65, 129.23, 127.24, 126.77, 125.26, 121.52, 112.22, 106.53, 99.66, 68.82, 56.30, 55.57. HRMS (ESI) calcd for  $\text{C}_{22}\text{H}_{20}\text{Cl}_2\text{N}_4\text{O}_4$   $[\text{M}+\text{H}]^+$  : 475.09344; found 475.09355. HPLC purity=97.23%, Rt 7.80 min.

**Modified procedure of step b:**

To the solution of tert-butyl (3-chloro-2-((5-((2-chloro-3,5-dimethoxybenzyl)oxy)pyrimidin-2-yl)amino)phenyl)carbamate (6r) (0.4974g, 0.9534mmol, 1.0eq) in toluene(2ml, 40ml/g) was added silica gel(0.05728g, 9.534mmol, 10eq) (100-200 mesh), the mixture was refluxed overnight. The solution was evaporated under reduced pressure and purified by silica gel column chromatography (DCM/MeOH) (0.1305g, yield: 28.79%).

$^1\text{H}$  NMR (400 MHz, DMSO- $d_6$ ):  $\delta$ (ppm) 8.18 (s, 3H), 6.93 (t,  $J$  = 8.0 Hz, 1H), 6.76 (d,  $J$  = 2.6 Hz, 1H), 6.71 (d,  $J$  = 2.6 Hz, 1H), 6.66 (d,  $J$  = 8.2 Hz, 1H), 6.61 (d,  $J$  = 7.9 Hz, 1H), 3.86 (s, 3H), 3.78 (s, 3H), 3.37 (s, 1H).

**N-(3-chloro-2-((5-((2,6-dichlorobenzyl)oxy)pyrimidin-2-yl)amino)phenyl)acrylamide (2u)** was synthesized following the approach outlined in Scheme S6 (example 2s) starting with 2-(bromomethyl)-1,3-dichlorobenzene.

$^1\text{H}$  NMR (500 MHz, DMSO- $d_6$ ):  $\delta$ (ppm) 9.60 (s, 1H), 8.34 (s, 1H), 8.26 (s, 2H), 7.92 (d,  $J$  = 7.7 Hz, 1H), 7.55 (d,  $J$  = 7.8 Hz, 2H), 7.47 (dd,  $J$  = 8.7, 7.4 Hz, 1H), 7.24 – 7.30 (m, 2H), 6.57 (dd,  $J$  = 17.0, 10.2 Hz, 1H), 6.24 (dd,  $J$  = 17.0, 1.6 Hz, 1H), 5.74 (dd,  $J$  = 10.2, 1.8 Hz, 1H), 5.24 (s, 2H).  $^{13}\text{C}$  NMR (125 MHz, DMSO- $d_6$ ):  $\delta$ (ppm) 163.57, 156.74, 146.63, 146.23, 137.03, 136.03, 133.07, 131.70, 131.66, 131.30, 129.19, 128.77, 127.25, 126.81, 125.25, 121.52, 66.74. HRMS (ESI) calcd for  $\text{C}_{20}\text{H}_{15}\text{Cl}_3\text{N}_4\text{O}_2$   $[\text{M}+\text{H}]^+$  : 449.03334; found 449.03365. HPLC purity=97.84%, Rt 8.16 min.



Compounds **2v-2z** were synthesized according to procedures for compound **2t** with corresponding substituted benzyl bromides.

**N-(3-chloro-2-((5-((2-chloro-3-methoxybenzyl)oxy)pyrimidin-2-yl)amino)phenyl)acrylamide (2v):**

<sup>1</sup>H NMR (500 MHz, DMSO-d<sub>6</sub>): δ(ppm) 9.60 (s, 1H), 8.30 (s, 1H), 8.22 (s, 2H), 7.92 (d, *J* = 7.5 Hz, 1H), 7.34 (t, *J* = 8.0 Hz, 1H), 7.29-7.24 (m, 2H), 7.18-7.15 (m, 2H), 6.56 (dd, *J* = 17.0, 10.2 Hz, 1H), 6.23 (dd, *J* = 17.0, 1.7 Hz, 1H), 5.73 (dd, *J* = 10.2, 1.6 Hz, 1H), 5.14 (s, 2H), 3.87 (s, 3H). <sup>13</sup>C NMR (125 MHz, DMSO-d<sub>6</sub>): δ(ppm) 163.57, 156.50, 154.79, 146.47, 146.01, 136.98, 135.23, 133.04, 131.65, 129.24, 127.69, 127.24, 126.76, 125.26, 121.59, 121.52, 120.71, 112.56, 68.74, 56.23. HRMS (ESI) calcd for C<sub>21</sub>H<sub>18</sub>Cl<sub>2</sub>N<sub>4</sub>O<sub>3</sub> [M+H]<sup>+</sup> : 445.08287; found 445.08328. HPLC purity=98.52%, Rt 7.04 min.

**N-(3-chloro-2-((5-((2-chloro-5-methoxybenzyl)oxy)pyrimidin-2-yl)amino)phenyl)acrylamide (2w):**

<sup>1</sup>H NMR (400 MHz, DMSO-d<sub>6</sub>): δ(ppm) 9.59 (s, 1H), 8.31 (s, 1H), 8.24 (s, 2H), 7.92 (d, *J* = 7.7 Hz, 1H), 7.40 (d, *J* = 8.8 Hz, 1H), 7.32 – 7.19 (m, 2H), 7.17 (d, *J* = 3.0 Hz, 1H), 6.97 (dd, *J* = 8.8, 3.1 Hz, 1H), 6.56 (dd, *J* = 17.0, 10.2 Hz, 1H), 6.23 (dd, *J* = 17.0, 1.7 Hz, 1H), 5.73 (dd, *J* = 10.2, 1.7 Hz, 1H), 5.10 (s, 2H), 3.76 (s, 3H). <sup>13</sup>C NMR (125 MHz, DMSO-d<sub>6</sub>): δ(ppm) 163.59, 158.20, 156.56, 146.43, 146.11, 137.02, 134.84, 133.05, 131.65, 130.19, 129.24, 127.24, 126.77, 125.26, 123.79, 121.52, 115.99, 115.29, 68.72, 55.50. HRMS (ESI) calcd for C<sub>21</sub>H<sub>18</sub>Cl<sub>2</sub>N<sub>4</sub>O<sub>3</sub> [M+H]<sup>+</sup> : 445.08287; found 445.08328. HPLC purity=98.52%, Rt 7.04 min.

**N-(3-chloro-2-((5-((3,5-dimethoxybenzyl)oxy)pyrimidin-2-yl)amino)phenyl)acrylamide (2x):**

<sup>1</sup>H NMR (500 MHz, DMSO-d<sub>6</sub>): δ(ppm) 9.60 (s, 1H), 8.26 (s, 1H), 8.19 (s, 2H), 7.92 (d, *J* = 6.9 Hz, 1H), 7.35 – 7.16 (m, 2H), 6.64 – 6.49 (m, 3H), 6.45 (s, 1H), 6.23 (dd, *J* = 17.0, 1.8 Hz, 1H), 5.72 (dd, *J* = 10.2, 1.7 Hz, 1H), 5.03 (s, 2H), 3.73 (s, 6H). <sup>13</sup>C NMR (125 MHz, DMSO-d<sub>6</sub>): δ(ppm) 163.57, 160.53, 156.32, 146.40, 145.90, 138.88, 136.98, 133.03, 131.65, 129.28, 127.24, 126.74, 125.25, 121.49, 105.60, 99.69, 70.62, 55.18. HRMS (ESI) calcd for C<sub>22</sub>H<sub>21</sub>ClN<sub>4</sub>O<sub>4</sub> [M+H]<sup>+</sup> : 441.13241; found 441.13218. HPLC purity=96.52%, Rt 6.80 min.

**N-(3-chloro-2-((5-((2-chlorobenzyl)oxy)pyrimidin-2-yl)amino)phenyl)acrylamide (2y):**

<sup>1</sup>H NMR (400 MHz, DMSO-d<sub>6</sub>): δ(ppm) 9.60 (s, 1H), 8.31 (s, 1H), 8.24 (s, 2H), 7.92 (dd, *J* = 7.6, 1.7 Hz, 1H), 7.67 – 7.56 (m, 1H), 7.56 – 7.46 (m, 1H), 7.46 – 7.33 (m, 2H), 7.32 – 7.17 (m, 2H), 6.56 (dd, *J* = 17.0, 10.2 Hz, 1H), 6.24 (dd, *J* = 17.0, 1.9 Hz, 1H), 5.73 (dd, *J* = 10.0, 1.9 Hz, 1H), 5.15 (s, 2H). <sup>13</sup>C NMR (125 MHz, DMSO-d<sub>6</sub>): δ(ppm) 163.57, 156.53, 146.47, 146.05, 136.99, 133.87, 133.05, 132.82, 131.64, 130.51, 130.11, 129.41, 129.24, 127.33, 127.24, 126.77, 125.26, 121.52, 68.69. HRMS (ESI) calcd for C<sub>20</sub>H<sub>16</sub>Cl<sub>2</sub>N<sub>4</sub>O<sub>2</sub> [M+H]<sup>+</sup> : 415.07231; found 415.07259. HPLC purity=99.08%, Rt 7.66 min.

**N-(3-chloro-2-((5-((3-methoxybenzyl)oxy)pyrimidin-2-yl)amino)phenyl)acrylamide (2z):**

<sup>1</sup>H NMR (500 MHz, DMSO-d<sub>6</sub>): δ(ppm) 9.60 (s, 1H), 8.27 (s, 1H), 8.20 (s, 2H), 7.92 (d, *J* = 7.4 Hz, 1H), 7.31-7.23 (m, 3H), 6.99 (s, 2H), 6.90 (dd, *J* = 8.1, 1.7 Hz, 1H), 6.56 (dd, *J* = 17.0, 10.2 Hz, 1H), 6.23 (dd, *J* = 17.0, 1.7 Hz, 1H), 5.72 (dd, *J* = 10.2, 1.7 Hz, 1H), 5.07 (s, 2H), 3.75 (s, 3H). <sup>13</sup>C NMR (125 MHz, DMSO-d<sub>6</sub>): δ(ppm) 163.58, 159.34, 156.32, 146.46, 145.90, 138.12, 136.99, 133.05, 131.66, 129.56, 129.30, 127.25, 126.74, 125.27, 121.51, 119.92, 113.53, 113.30. HRMS (ESI) calcd for C<sub>21</sub>H<sub>19</sub>ClN<sub>4</sub>O<sub>3</sub> [M+H]<sup>+</sup> : 411.12184; found 411.12159. HPLC purity=96.82%, Rt 6.44 min.

**Computational Study.** All the procedure was performed in Maestro 9.9 (Schrodinger LLC). The crystal structures of FGFR4 and FGFR1 were taken from PDB ID 4XCU and 3TT0, respectively. The covalent bond between the inhibitor (BLU9931) and the protein (FGFR4, PDB ID: 4XCU) was delete, Then, the protein was processed using the “Protein Preparation Wizard” workflow in Maestro 9.9 (Schrodinger LLC) to adding bond orders and add hydrogens. All hetatm residues and crystal water molecules beyond 5A from het group were removed. 2a were built by in LigPrep module using OPLS-2005 force field. Glide module (Covalent Docking) was used as docking program. Michael Addition was chose as the reaction type. CYS552 was chose as the reactive residue. The docking box was placed on the centroid of the binding ligand in the optimized crystal structure as described above. Covalent docking approach of Glide was adopted to dock 2a to FGFR4 with the default parameters.

**In Vitro Enzymatic Activity Assay.** FGFR<sup>WT</sup> (FGFR1, PV3146; FGFR2, PV3368; FGFR3, PV3145; FGFR4, P3054) and the Z'-Lyte Kinase Assay Kit were purchased from Invitrogen. The experiments were performed according to the instructions of the manufacturer. The concentrations of kinases were determined by optimization experiments and the respective concentration was: FGFR 0.22 µg/ µL. First, the compounds were diluted three-fold from  $5.1 \times 10^{-9}$  M to  $1 \times 10^{-4}$  M in DMSO and a 400 µM compound solution was prepared (4 µL compound dissolved in 96 µL water). Second, a 100 µL ATP solution in  $1.33 \times$  Kinase Buffer was prepared. Third, a kinase/peptide mixture containing  $2 \times$  kinase and 4 µM Tyr 4 peptide (Invitrogen, PV3193) was prepared right before use. The final 10 µL reaction consists of 0.002 ng of FGFR, 2 µM Tyr4 peptide in  $1 \times$  kinase buffer. For each assay, 10 µL kinase reactions were made at first (including 2.5 µL compound solution, 5 µL Kinase/Peptide Mixture, and 2.5 µL ATP solution). Mixed the plate thoroughly and incubated for one hour at room temperature. Then 5 µL development solution was added to each well and the plate was incubated for 1h at room temperature; the nonphosphopeptides were cleaved at this time. In the end, 5 µL stop reagent was loaded to stop the reaction. For the control setting, 5 µL phospho-peptide solution instead of kinase/peptide mixture was used as 100% phosphorylation control. 2.5 µL  $1.33 \times$  Kinase Buffer instead of ATP solution was used as 100% inhibition control, and 2.5 µL 4% DMSO instead of compound solution was used as the 0% inhibitor control. The plate was measured on an EnVision Multilabel Reader (Perkin-Elmer). Curve fitting and data presentations were performed using Graph Pad Prism, version 5.0. Every experiment was repeated at least 3 times.

**Cell Culture.** The human breast cancer cell lines MDA-MB-453, MDA-MB-231 and MCF-7 were purchased from American type culture collection (ATCC). MDA-MB-453 and MDA-MB-231 cells were maintained in RPMI-1640, and MCF-7 cells were maintained in DMEM. They all were supplemented with 10% FBS, 100 U/mL penicillin, 50 mg/mL streptomycin, and 2 mmol/L glutamine in a humidified CO<sub>2</sub> incubator at 37°C. All cells were passaged for less than 3 months before renewal from frozen, early-passage stocks obtained from the indicated sources.

**Cell Proliferation Assay.** Tumor cells were seeded (2,500 cells per well) in 96-well plates in complete medium and cultured overnight, and then were treated with a dilution series of test compounds for 72 h. Cell proliferation was evaluated by Cell Counting Kit 8(CCK8, CK04, Dojindo laboratories, Japan). IC<sub>50</sub> values were calculated by concentration-response cure fitting using GraphPad Prism 5.0 software. Each IC<sub>50</sub> value was expressed as mean±SD.

**Western Blot Analysis.** The western blot analysis was carried out by following the protocol described before. Briefly, after the indicated treatment, cell lysates were collected dissolving cells in 1×SDS sample lysis buffer (CST recommended). After being sonicated and boiled, the supernatant of cell lysate were used for western blot analysis. Cell lysates were loaded to 8-12% SDS-PAGE and separated by electrophoresis. Separated proteins were then electrically transferred to a PVDF film. After being blocked with 1×TBS containing 0.5% Tween-20 and 5% non-fat milk, the film was incubated with corresponding primary antibody followed by HRP-conjugated secondary antibody. And the protein lanes were visualized using ECL Western Blotting Detection Kit (Thermo Scientific, USA).

**KINOMEscan™:** kinase-tagged T7 phase strains were prepared in an E. coli host derived from the BL21 strain. E. coli were grown to log-phase and infected with T7 phage and incubated with shaking at 32 °C until lysis. The lysates were centrifuged and filtered to remove cell debris. The remaining kinases were produced in HEK-293 cells and subsequently tagged with DNA for qPCR detection. Streptavidin-coated magnetic beads were treated with blocking buffer (SeaBlock (Pierce), 1% BSA, 0.05% Tween 20, 1mM DTT) to remove unbound ligand and to reduce non-specific binding. Binding reactions were assembled by combining kinases, liganded affinity beads, and test compounds in 1x binding buffer (20% SeaBlock (Pierce), 0.17x BSA, 0.05% Tween 20, 1mM DTT). All reactions were performed in polystyrene 96-well plates in a final volume of 0.135 ml. The assay plates were incubated at room temperature with shaking for 1 hour and the affinity beads were washed with wash buffer (1x PBS, 0.05% Tween 20). The beads were then re-suspended in elution buffer (1x PBS, 0.05% Tween 20, 0.5 μM non-biotinylated affinity ligand) and incubated at room temperature with shaking for 30 minutes. The kinase concentration in the eluates was measured by qPCR.

For K<sub>d</sub> determination, an 11-point 3-fold serial dilution of compound 2n was prepared in 100% DMSO at 100x final test concentration and subsequently diluted to 1x in the assay (final DMSO concentration = 1%). Binding constants (K<sub>d</sub>s) were calculated with a standard dose-response curve using the Hill equation.

For primary screening, compound 2n was screened at the concentration of 1μM/L, and the results are reported as '% Ctrl'.

**Table S2.** Matrix of Compound Screen for inhibitor **2n**

| Gene Symbol         | %Ctrl @ 1000nM | Gene Symbol                   | %Ctrl @ 1000nM | Gene Symbol               | %Ctrl @ 1000nM |
|---------------------|----------------|-------------------------------|----------------|---------------------------|----------------|
| BRK                 | 100            | AAK1                          | 100            | CSNK1G2                   | 100            |
| BRSK1               | 100            | ABL1(E255K)-phosphorylated    | 100            | CSNK1G3                   | 96             |
| BRSK2               | 99             | ABL1(F317I)-nonphosphorylated | 100            | CSNK2A1                   | 99             |
| BTK                 | 100            | ABL1(F317I)-phosphorylated    | 100            | CSNK2A2                   | 100            |
| BUB1                | 93             | ABL1(F317L)-nonphosphorylated | 100            | CTK                       | 100            |
| CAMK1               | 100            | ABL1(F317L)-phosphorylated    | 100            | DAPK1                     | 87             |
| CAMK1B              | 100            | ABL1(H396P)-nonphosphorylated | 100            | DAPK2                     | 91             |
| CAMK1D              | 5.3            | ABL1(H396P)-phosphorylated    | 100            | DAPK3                     | 83             |
| CAMK1G              | 100            | ABL1(M351T)-phosphorylated    | 100            | DCAMKL1                   | 82             |
| CAMK2A              | 91             | ABL1(Q252H)-nonphosphorylated | 100            | DCAMKL2                   | 94             |
| CAMK2B              | 97             | ABL1(Q252H)-phosphorylated    | 100            | DCAMKL3                   | 86             |
| CAMK2D              | 100            | ABL1(T315I)-nonphosphorylated | 100            | DDR1                      | 100            |
| CAMK2G              | 100            | ABL1(T315I)-phosphorylated    | 96             | DDR2                      | 96             |
| CAMK4               | 86             | ABL1(Y253F)-phosphorylated    | 100            | DLK                       | 100            |
| CAMKK1              | 98             | ABL1-nonphosphorylated        | 87             | DMPK                      | 89             |
| CAMKK2              | 99             | ABL1-phosphorylated           | 97             | DMPK2                     | 100            |
| CASK                | 95             | ABL2                          | 100            | DRAK1                     | 100            |
| CDC2L1              | 100            | ACVR1                         | 100            | DRAK2                     | 100            |
| CDC2L2              | 100            | ACVR1B                        | 82             | DYRK1A                    | 88             |
| CDC2L5              | 100            | ACVR2A                        | 100            | DYRK1B                    | 37             |
| CDK11               | 92             | ACVR2B                        | 99             | DYRK2                     | 98             |
| CDK2                | 98             | ACVRL1                        | 76             | EGFR                      | 87             |
| CDK3                | 92             | ADCK3                         | 100            | EGFR(E746-A750del)        | 96             |
| CDK4                | 100            | ADCK4                         | 100            | EGFR(G719C)               | 96             |
| CDK4-cyclinD1       | 96             | AKT1                          | 100            | EGFR(G719S)               | 80             |
| CDK4-cyclinD3       | 100            | AKT2                          | 97             | EGFR(L747-E749del, A750P) | 89             |
| CDK5                | 89             | AKT3                          | 80             | EGFR(L747-S752del, P753S) | 100            |
| CDK7                | 100            | ALK                           | 90             | EGFR(L747-T751del,Sins)   | 64             |
| CDK8                | 63             | ALK(C1156Y)                   | 100            | EGFR(L858R)               | 97             |
| CDK9                | 100            | ALK(L1196M)                   | 92             | EGFR(L858R,T790M)         | 100            |
| CDKL1               | 91             | AMPK-alpha1                   | 96             | EGFR(L861Q)               | 88             |
| CDKL2               | 93             | AMPK-alpha2                   | 100            | EGFR(S752-I759del)        | 93             |
| CDKL3               | 94             | ANKK1                         | 100            | EGFR(T790M)               | 100            |
| CDKL5               | 100            | ARK5                          | 100            | EIF2AK1                   | 100            |
| CHEK1               | 100            | ASK1                          | 98             | EPHA1                     | 100            |
| CHEK2               | 100            | ASK2                          | 92             | EPHA2                     | 100            |
| CIT                 | 86             | AURKA                         | 100            | EPHA3                     | 100            |
| CLK1                | 99             | AURKB                         | 90             | EPHA4                     | 100            |
| CLK2                | 94             | AURKC                         | 90             | EPHA5                     | 88             |
| CLK3                | 100            | AXL                           | 100            | EPHA6                     | 100            |
| CLK4                | 99             | BIKE                          | 89             | EPHA7                     | 92             |
| CSF1R               | 100            | BLK                           | 100            | EPHA8                     | 99             |
| CSF1R-autoinhibited | 100            | BMPR1A                        | 100            | EPHB1                     | 100            |
| CSK                 | 100            | BMPR1B                        | 100            | EPHB2                     | 100            |
| CSNK1A1             | 100            | BMPR2                         | 97             | EPHB3                     | 100            |
| CSNK1A1L            | 100            | BMX                           | 100            | EPHB4                     | 100            |
| CSNK1D              | 96             | BRAF                          | 100            | EPHB6                     | 100            |
| CSNK1E              | 100            | BRAF(V600E)                   | 100            | ERBB2                     | 83             |
| CSNK1G1             | 100            |                               |                | ERBB3                     | 55             |

| Gene Symbol           | %Ctrl @ 1000nM | Gene Symbol                  | %Ctrl @ 1000nM | Gene Symbol | %Ctrl @ 1000nM |
|-----------------------|----------------|------------------------------|----------------|-------------|----------------|
| ERBB4                 | 100            | ICK                          | 100            | MAPKAPK2    | 70             |
| ERK1                  | 99             | IGF1R                        | 87             | MAPKAPK5    | 100            |
| ERK2                  | 82             | IKK-alpha                    | 91             | MARK1       | 98             |
| ERK3                  | 100            | IKK-beta                     | 90             | MARK2       | 81             |
| ERK4                  | 92             | IKK-epsilon                  | 100            | MARK3       | 100            |
| ERK5                  | 100            | INSR                         | 100            | MARK4       | 100            |
| ERK8                  | 94             | INSRR                        | 100            | MAST1       | 61             |
| ERN1                  | 100            | IRAK1                        | 100            | MEK1        | 100            |
| FAK                   | 96             | IRAK3                        | 100            | MEK2        | 92             |
| FER                   | 95             | IRAK4                        | 100            | MEK3        | 100            |
| FES                   | 100            | ITK                          | 100            | MEK4        | 100            |
| FGFR1                 | 100            | JAK1(JH1domain-catalytic)    | 100            | MEK5        | 92             |
| FGFR2                 | 100            | JAK1(JH2domain-pseudokinase) | 100            | MEK6        | 100            |
| FGFR3                 | 100            | JAK2(JH1domain-catalytic)    | 89             | MELK        | 100            |
| FGFR3(G697C)          | 96             | JAK3(JH1domain-catalytic)    | 49             | MERTK       | 100            |
| FGFR4                 | 0.5            | JNK1                         | 100            | MET         | 100            |
| FGR                   | 98             | JNK2                         | 100            | MET(M1250T) | 77             |
| FLT1                  | 92             | JNK3                         | 100            | MET(Y1235D) | 99             |
| FLT3                  | 81             | KIT                          | 100            | MINK        | 100            |
| FLT3(D835H)           | 84             | KIT(A829P)                   | 100            | MKK7        | 97             |
| FLT3(D835V)           | 95             | KIT(D816H)                   | 100            | MKNK1       | 100            |
| FLT3(D835Y)           | 100            | KIT(D816V)                   | 99             | MKNK2       | 100            |
| FLT3(ITD)             | 91             | KIT(L576P)                   | 99             | MLCK        | 100            |
| FLT3(ITD,D835V)       | 100            | KIT(V559D)                   | 100            | MLK1        | 100            |
| FLT3(ITD,F691L)       | 100            | KIT(V559D,T670I)             | 100            | MLK2        | 100            |
| FLT3(K663Q)           | 100            | KIT(V559D,V654A)             | 100            | MLK3        | 97             |
| FLT3(N841I)           | 62             | KIT-autoinhibited            | 100            | MRCKA       | 100            |
| FLT3(R834Q)           | 100            | LATS1                        | 94             | MRCKB       | 100            |
| FLT3-autoinhibited    | 100            | LATS2                        | 100            | MST1        | 100            |
| FLT4                  | 94             | LCK                          | 96             | MST1R       | 97             |
| FRK                   | 100            | LIMK1                        | 100            | MST2        | 91             |
| FYN                   | 93             | LIMK2                        | 100            | MST3        | 99             |
| GAK                   | 100            | LKB1                         | 86             | MST4        | 100            |
| GCN2(Kin.Dom.2,S808G) | 88             | LOK                          | 91             | MTOR        | 54             |
| GRK1                  | 100            | LRRK2                        | 100            | MUSK        | 100            |
| GRK2                  | 100            | LRRK2(G2019S)                | 100            | MYLK        | 89             |
| GRK3                  | 100            | LTK                          | 98             | MYLK2       | 93             |
| GRK4                  | 7.8            | LYN                          | 100            | MYLK4       | 100            |
| GRK7                  | 100            | LZK                          | 98             | MYO3A       | 100            |
| GSK3A                 | 98             | MAK                          | 97             | MYO3B       | 93             |
| GSK3B                 | 83             | MAP3K1                       | 91             | NDR1        | 98             |
| HASPIN                | 90             | MAP3K15                      | 100            | NDR2        | 100            |
| HCK                   | 90             | MAP3K2                       | 90             | NEK1        | 100            |
| HIPK1                 | 85             | MAP3K3                       | 100            | NEK10       | 100            |
| HIPK2                 | 100            | MAP3K4                       | 100            | NEK11       | 100            |
| HIPK3                 | 99             | MAP4K2                       | 100            | NEK2        | 100            |
| HIPK4                 | 100            | MAP4K3                       | 100            | NEK3        | 79             |
| HPK1                  | 92             | MAP4K4                       | 100            | NEK4        | 95             |
| HUNK                  | 100            | MAP4K5                       | 100            | NEK5        | 100            |

| Gene Symbol           | %Ctrl @ 1000nM | Gene Symbol                   | %Ctrl @ 1000nM |
|-----------------------|----------------|-------------------------------|----------------|
| NEK6                  | 77             | PIP5K1A                       | 100            |
| NEK7                  | 100            | PIP5K1C                       | 68             |
| NEK9                  | 81             | PIP5K2B                       | 90             |
| NIK                   | 100            | PIP5K2C                       | 88             |
| NIM1                  | 100            | PKAC-alpha                    | 82             |
| NLK                   | 94             | PKAC-beta                     | 58             |
| OSR1                  | 100            | PKMYT1                        | 98             |
| p38-alpha             | 100            | PKN1                          | 100            |
| p38-beta              | 96             | PKN2                          | 92             |
| p38-delta             | 100            | PKNB(M.tuberculosis)          | 95             |
| p38-gamma             | 92             | PLK1                          | 100            |
| PAK1                  | 100            | PLK2                          | 100            |
| PAK2                  | 100            | PLK3                          | 88             |
| PAK3                  | 99             | PLK4                          | 100            |
| PAK4                  | 100            | PRKCD                         | 100            |
| PAK6                  | 100            | PRKCE                         | 64             |
| PAK7                  | 100            | PRKCH                         | 98             |
| PCTK1                 | 100            | PRKCI                         | 100            |
| PCTK2                 | 100            | PRKCQ                         | 71             |
| PCTK3                 | 100            | PRKD1                         | 98             |
| PDGFRA                | 100            | PRKD2                         | 100            |
| PDGFRB                | 100            | PRKD3                         | 99             |
| PDPK1                 | 100            | PRKG1                         | 66             |
| PFCDPK1(P.falciparum) | 76             | PRKG2                         | 100            |
| PFPK5(P.falciparum)   | 100            | PRKR                          | 99             |
| PFTAIRE2              | 96             | PRKX                          | 100            |
| PFTK1                 | 100            | PRP4                          | 100            |
| PHKG1                 | 100            | PYK2                          | 100            |
| PHKG2                 | 86             | QSK                           | 81             |
| PIK3C2B               | 100            | RAF1                          | 100            |
| PIK3C2G               | 100            | RET                           | 100            |
| PIK3CA                | 100            | RET(M918T)                    | 100            |
| PIK3CA(C420R)         | 100            | RET(V804L)                    | 99             |
| PIK3CA(E542K)         | 99             | RET(V804M)                    | 100            |
| PIK3CA(E545A)         | 99             | RIOK1                         | 99             |
| PIK3CA(E545K)         | 63             | RIOK2                         | 100            |
| PIK3CA(H1047L)        | 100            | RIOK3                         | 97             |
| PIK3CA(H1047Y)        | 100            | RIPK1                         | 99             |
| PIK3CA(I800L)         | 93             | RIPK2                         | 100            |
| PIK3CA(M1043I)        | 100            | RIPK4                         | 98             |
| PIK3CA(Q546K)         | 100            | RIPK5                         | 88             |
| PIK3CB                | 100            | ROCK1                         | 100            |
| PIK3CD                | 100            | ROCK2                         | 100            |
| PIK3CG                | 96             | ROS1                          | 94             |
| PIK4CB                | 99             | RPS6KA4(Kin.Dom.1-N-terminal) | 66             |
| PIKFYVE               | 66             | RPS6KA4(Kin.Dom.2-C-terminal) | 100            |
| PIM1                  | 94             | RPS6KA5(Kin.Dom.1-N-terminal) | 100            |
| PIM2                  | 97             | RPS6KA5(Kin.Dom.2-C-terminal) | 100            |
| PIM3                  | 100            | RSK1(Kin.Dom.1-N-terminal)    | 100            |

| Gene Symbol                | %Ctrl @ 1000nM | Gene Symbol                   | %Ctrl @ 1000nM |
|----------------------------|----------------|-------------------------------|----------------|
| RSK1(Kin.Dom.2-C-terminal) | 100            | TRPM6                         | 100            |
| RSK2(Kin.Dom.1-N-terminal) | 98             | TSSK1B                        | 100            |
| RSK2(Kin.Dom.2-C-terminal) | 100            | TSSK3                         | 58             |
| RSK3(Kin.Dom.1-N-terminal) | 96             | TTK                           | 65             |
| RSK3(Kin.Dom.2-C-terminal) | 95             | TXK                           | 100            |
| RSK4(Kin.Dom.1-N-terminal) | 97             | TYK2(JH1 domain-catalytic)    | 100            |
| RSK4(Kin.Dom.2-C-terminal) | 90             | TYK2(JH2 domain-pseudokinase) | 100            |
| S6K1                       | 98             | TYRO3                         | 100            |
| SBK1                       | 100            | ULK1                          | 100            |
| SGK                        | 100            | ULK2                          | 99             |
| SgK110                     | 100            | ULK3                          | 100            |
| SGK2                       | 89             | VEGFR2                        | 100            |
| SGK3                       | 100            | VPS34                         | 100            |
| SIK                        | 86             | VRK2                          | 100            |
| SIK2                       | 100            | WEE1                          | 95             |
| SLK                        | 97             | WEE2                          | 100            |
| SNARK                      | 100            | WNK1                          | 100            |
| SNRK                       | 91             | WNK2                          | 100            |
| SRC                        | 75             | WNK3                          | 100            |
| SRMS                       | 100            | WNK4                          | 100            |
| SRPK1                      | 100            | YANK1                         | 100            |
| SRPK2                      | 100            | YANK2                         | 100            |
| SRPK3                      | 12             | YANK3                         | 100            |
| STK16                      | 100            | YES                           | 97             |
| STK33                      | 97             | YSK1                          | 100            |
| STK35                      | 100            | YSK4                          | 100            |
| STK36                      | 100            | ZAK                           | 100            |
| STK39                      | 72             | ZAP70                         | 91             |
| SYK                        | 97             |                               |                |
| TAK1                       | 100            |                               |                |
| TAOK1                      | 100            |                               |                |
| TAOK2                      | 100            |                               |                |
| TAOK3                      | 100            |                               |                |
| TBK1                       | 92             |                               |                |
| TEC                        | 100            |                               |                |
| TESK1                      | 100            |                               |                |
| TGFBR1                     | 100            |                               |                |
| TGFBR2                     | 86             |                               |                |
| TIE1                       | 100            |                               |                |
| TIE2                       | 94             |                               |                |
| TLK1                       | 100            |                               |                |
| TLK2                       | 100            |                               |                |
| TNIK                       | 94             |                               |                |
| TNK1                       | 100            |                               |                |
| TNK2                       | 100            |                               |                |
| TNNI3K                     | 100            |                               |                |
| TRKA                       | 100            |                               |                |
| TRKB                       | 100            |                               |                |
| TRKC                       | 100            |                               |                |

**Table S3.** S-score Table for **2n**

| Compd     | Selectivity Score Type | Number of hits | Number of Non-Mutant Kinases | Screening Concentration (nM) | Selectivity Score |
|-----------|------------------------|----------------|------------------------------|------------------------------|-------------------|
| <b>2n</b> | S(35)                  | 4              | 403                          | 1000                         | 0.01              |
|           | S(10)                  | 3              | 403                          | 1000                         | 0.007             |
|           | S(1)                   | 1              | 403                          | 1000                         | 0.002             |

**Figure S2.** Compound **2n** induces apoptosis in MDA-MB-453.

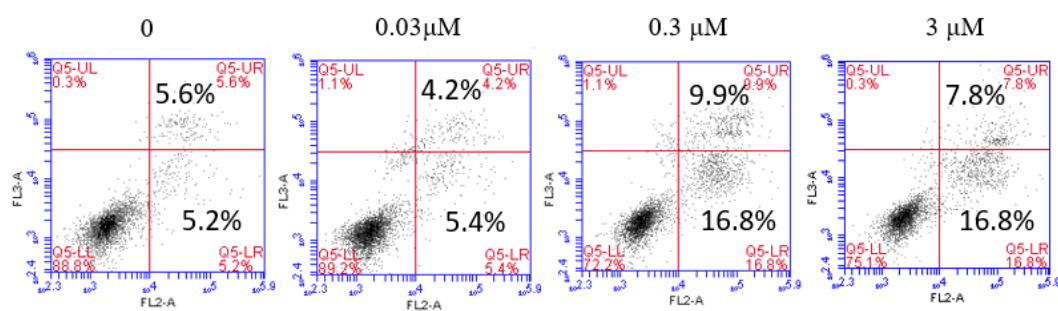

\*MDA-MB-453 Cells were treated with 0.03  $\mu\text{M}$ , 0.3  $\mu\text{M}$ , 3  $\mu\text{M}$  compound **2n** for 48h before analysis by annexin V/7-ADD staining.



<sup>1</sup>H NMR and <sup>13</sup>C NMR spectra of compound **2a-2z** (Solvent: DMSO-d<sub>6</sub> for all compounds)

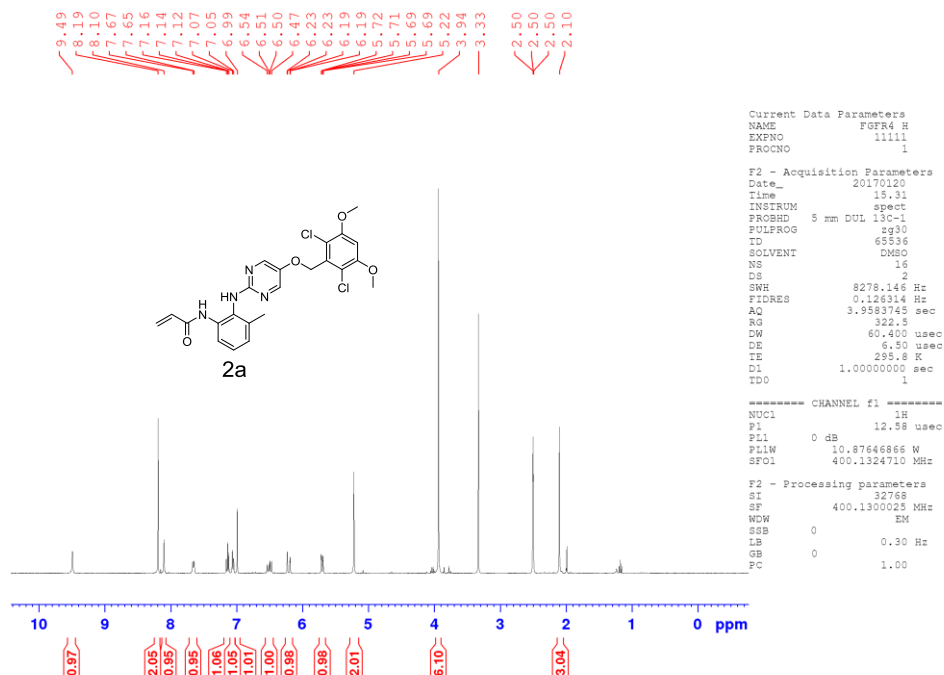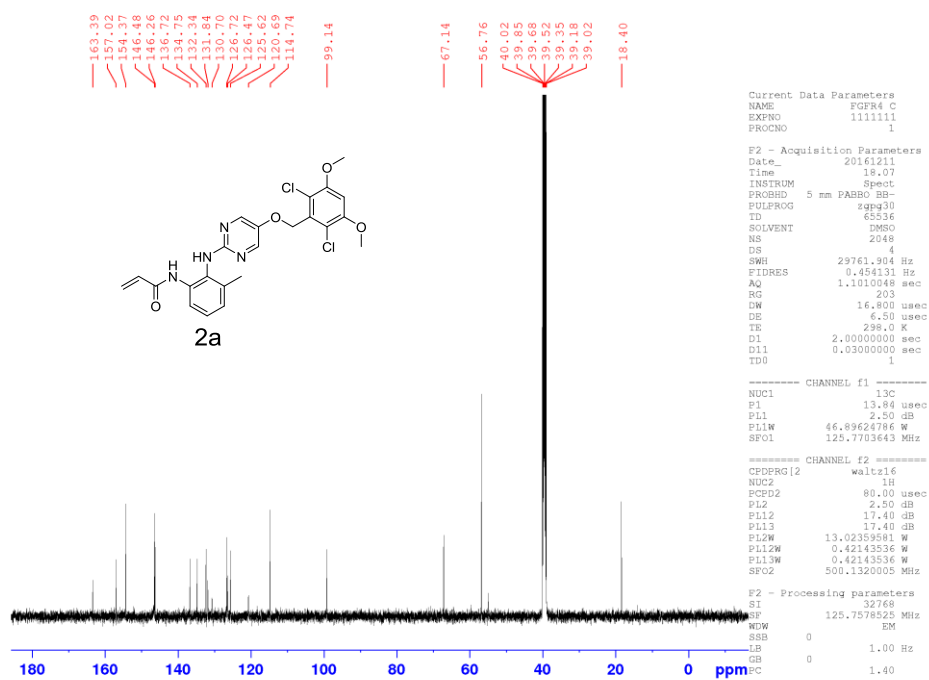

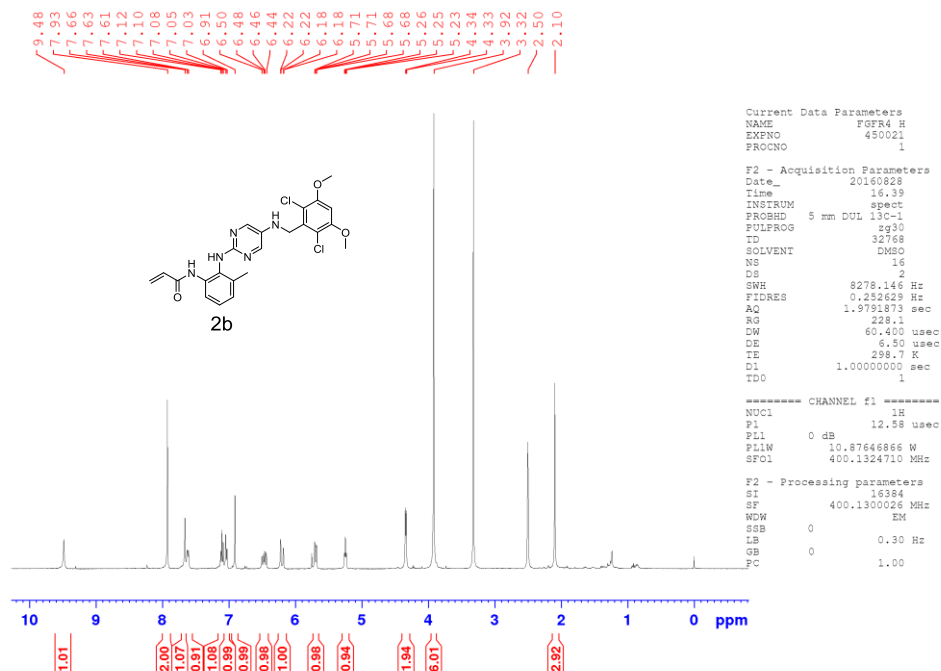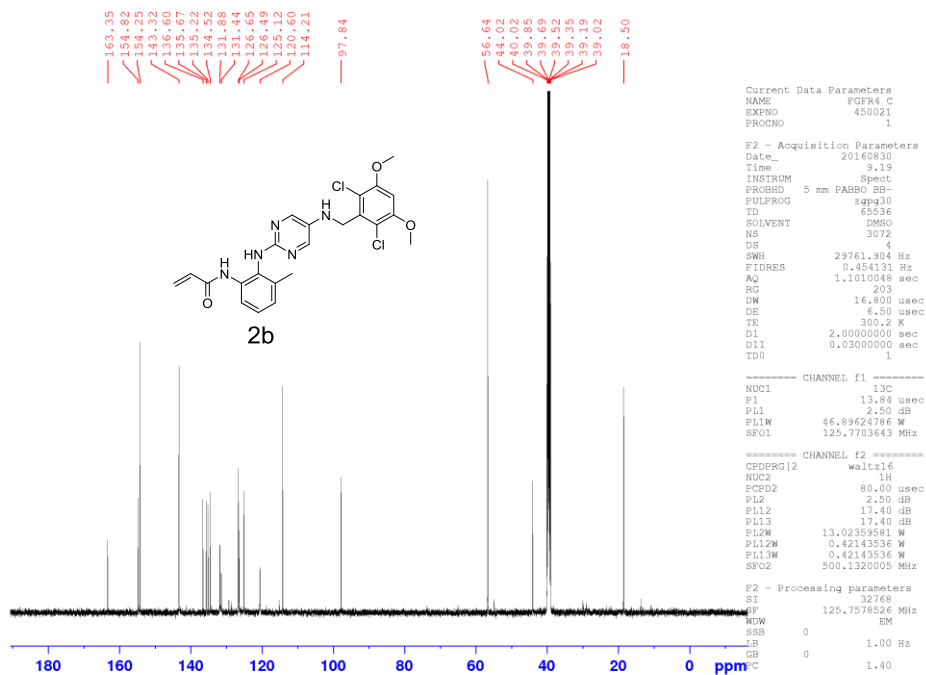

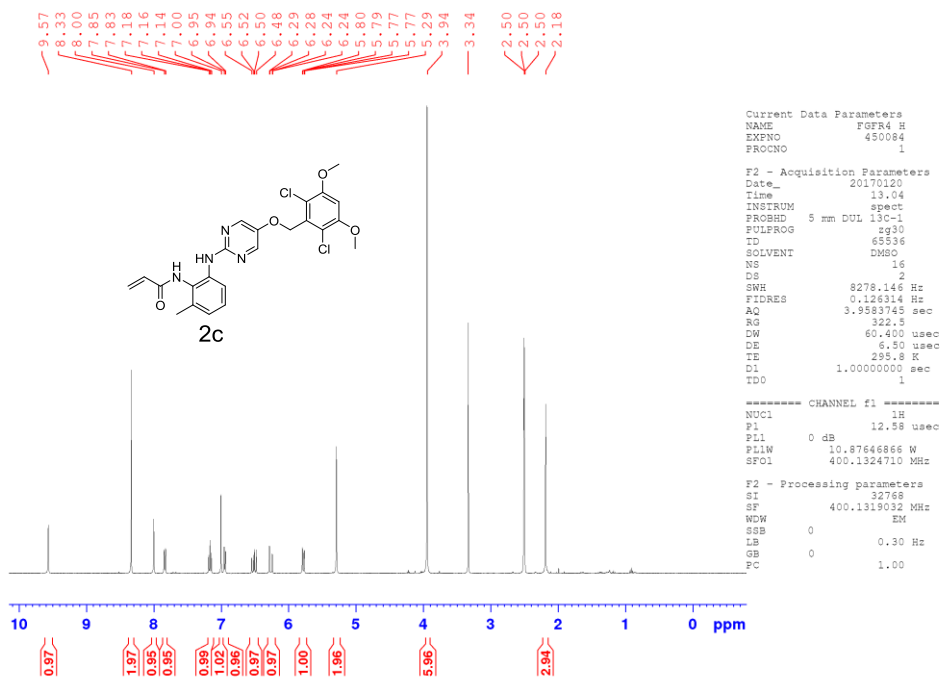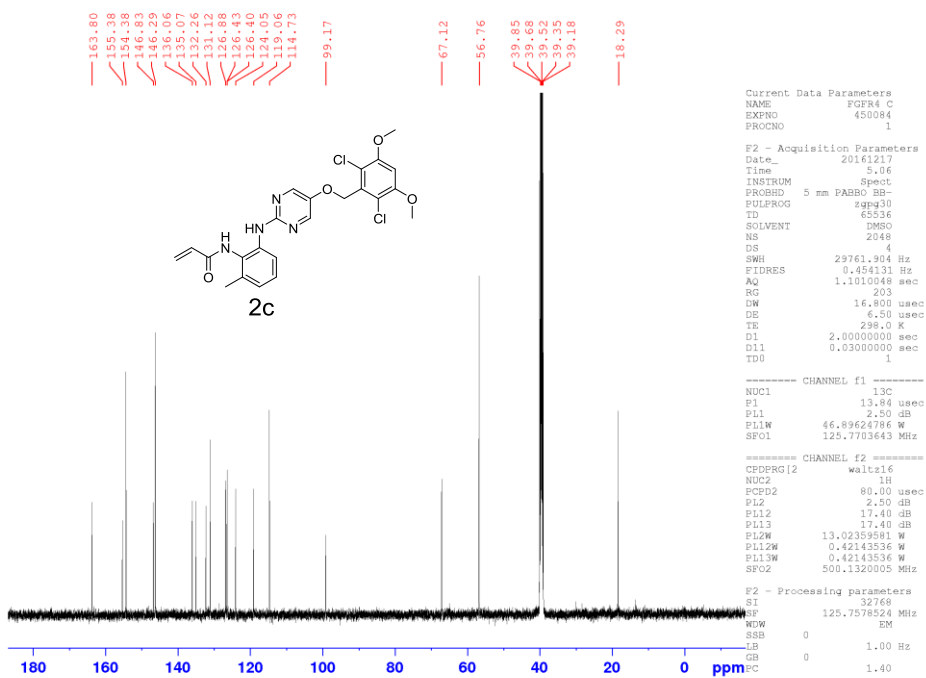

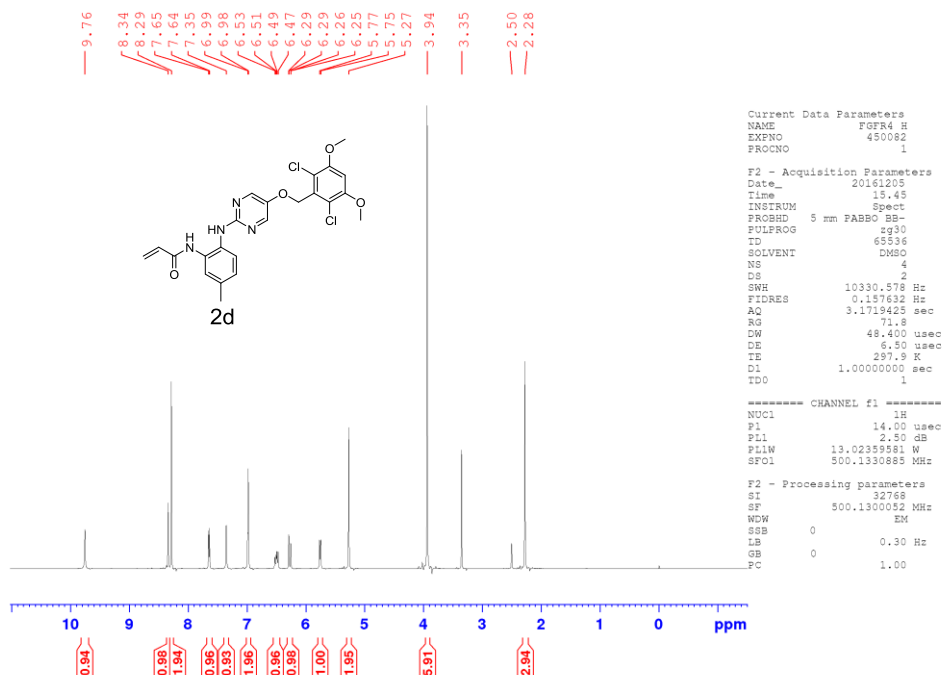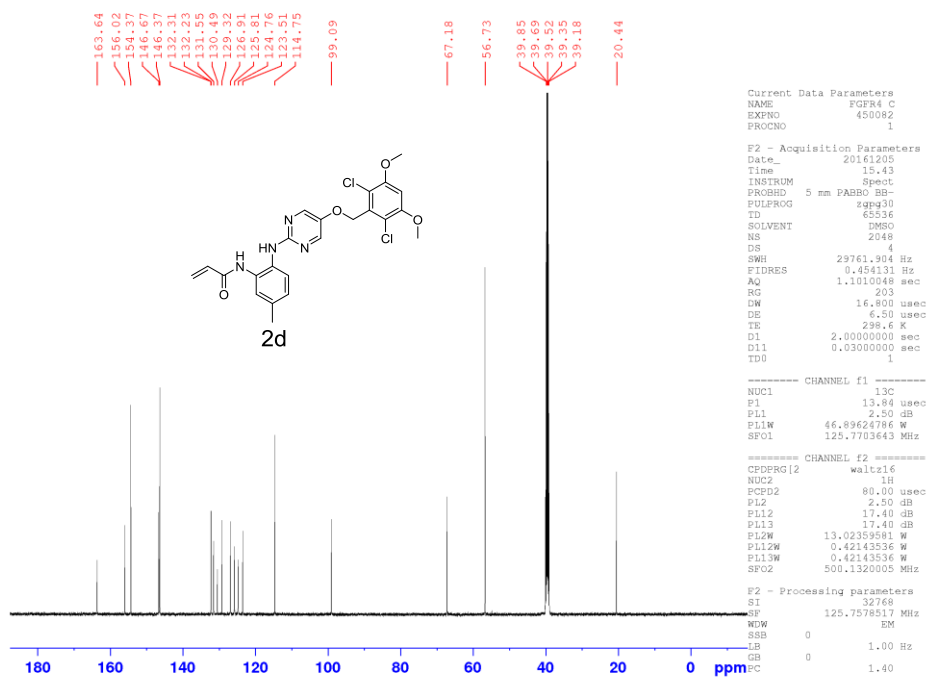

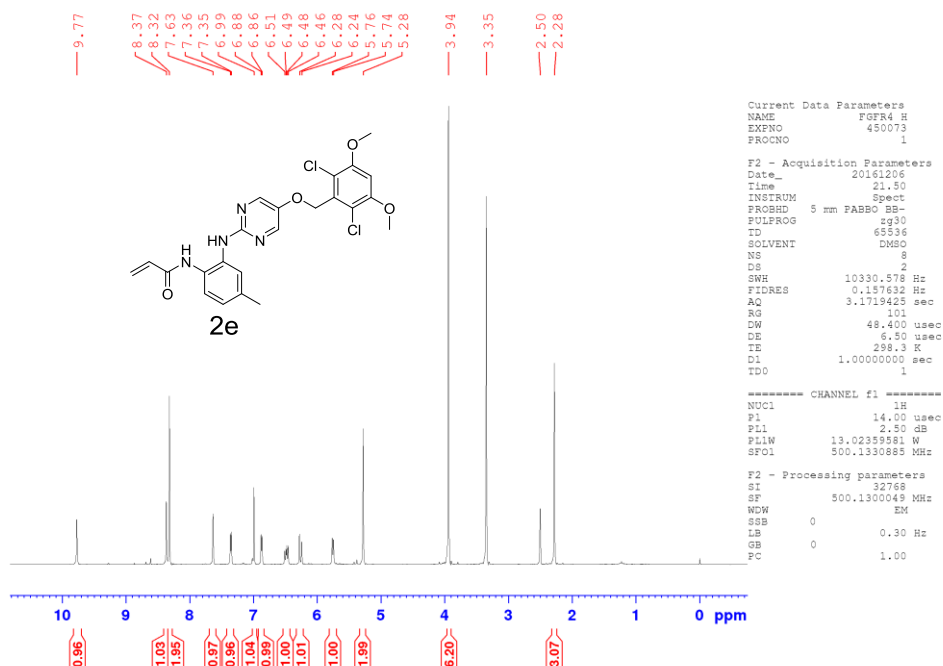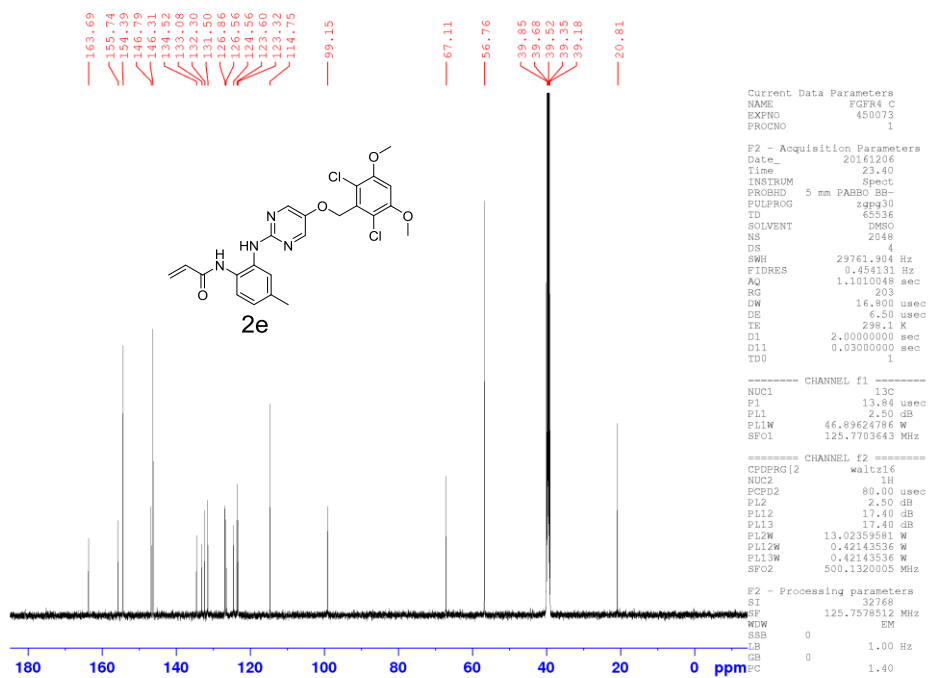

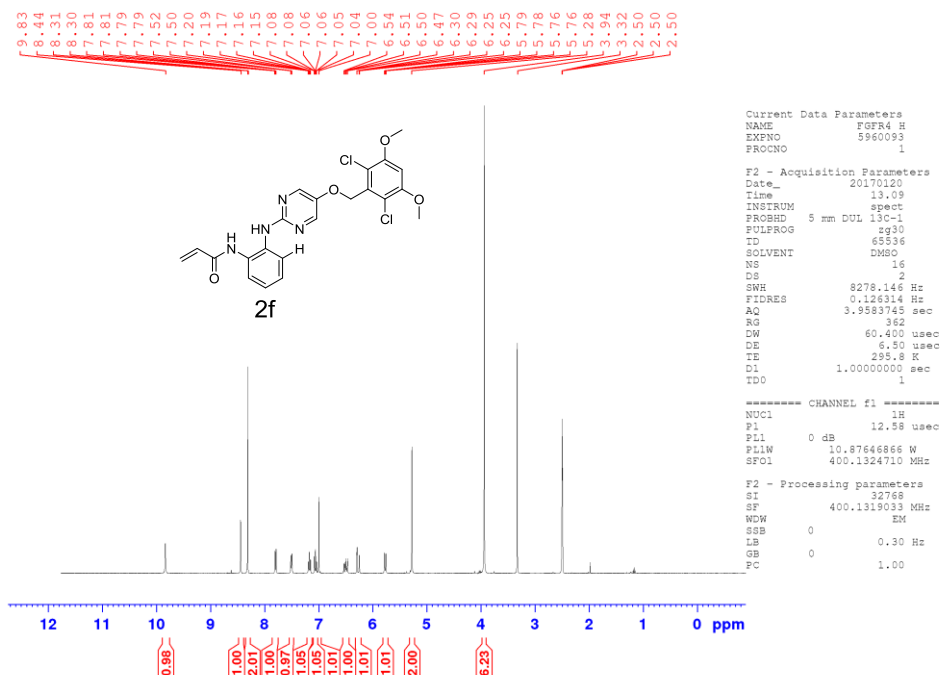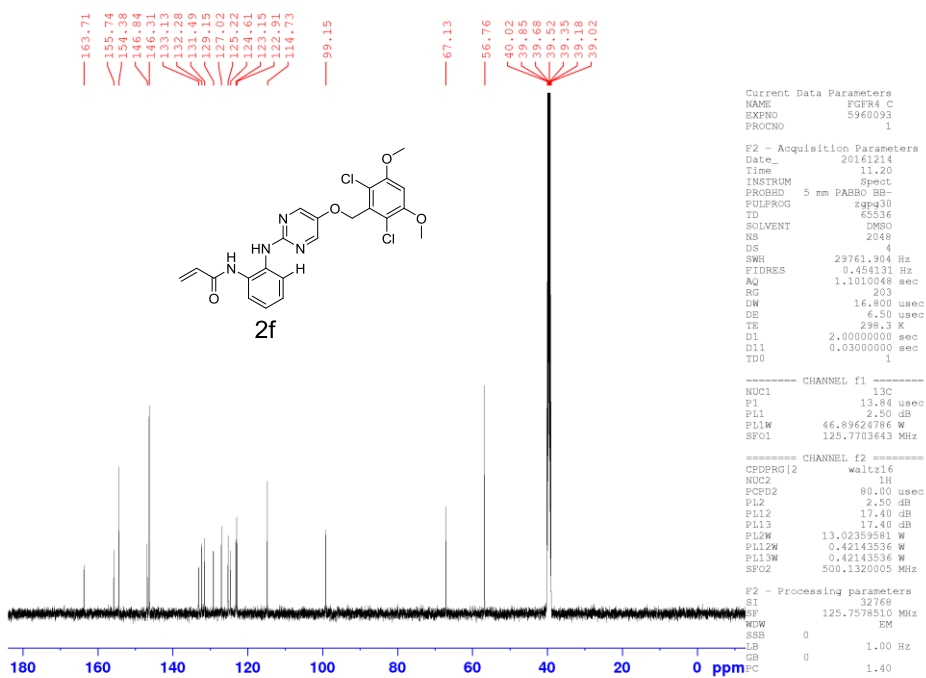

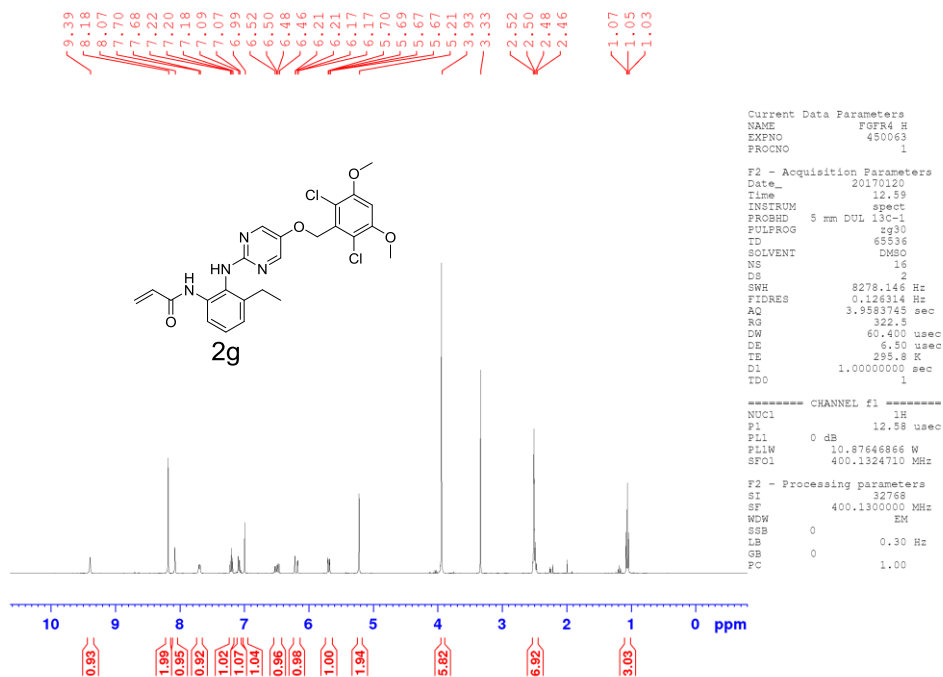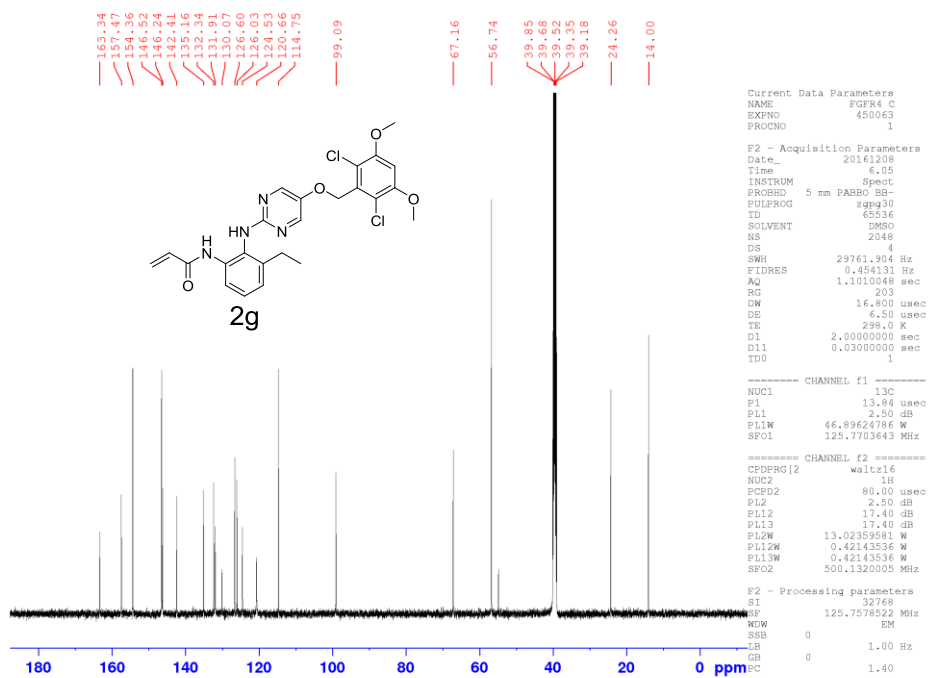

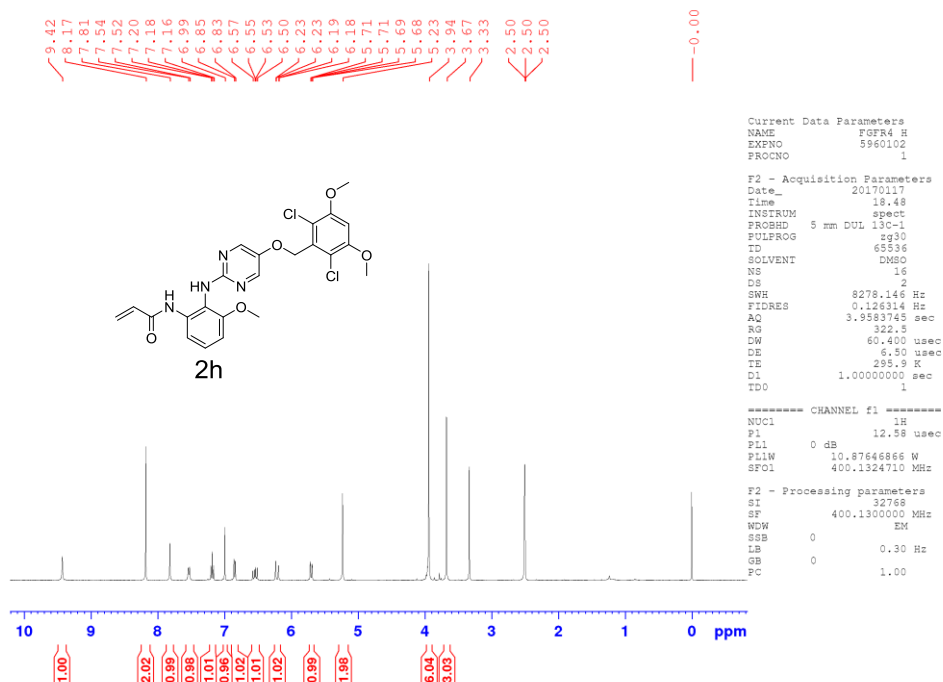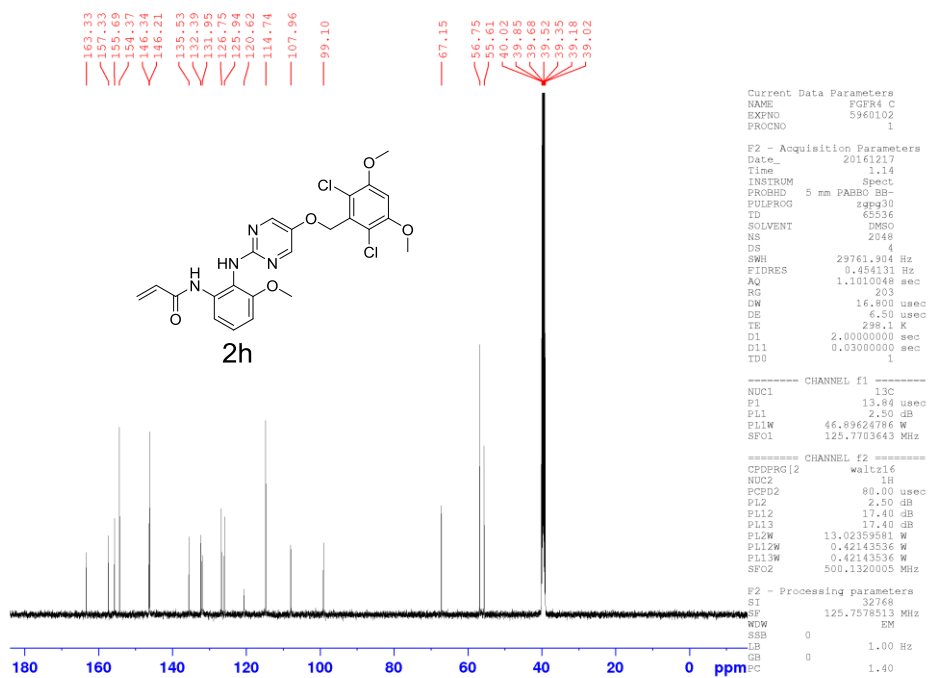



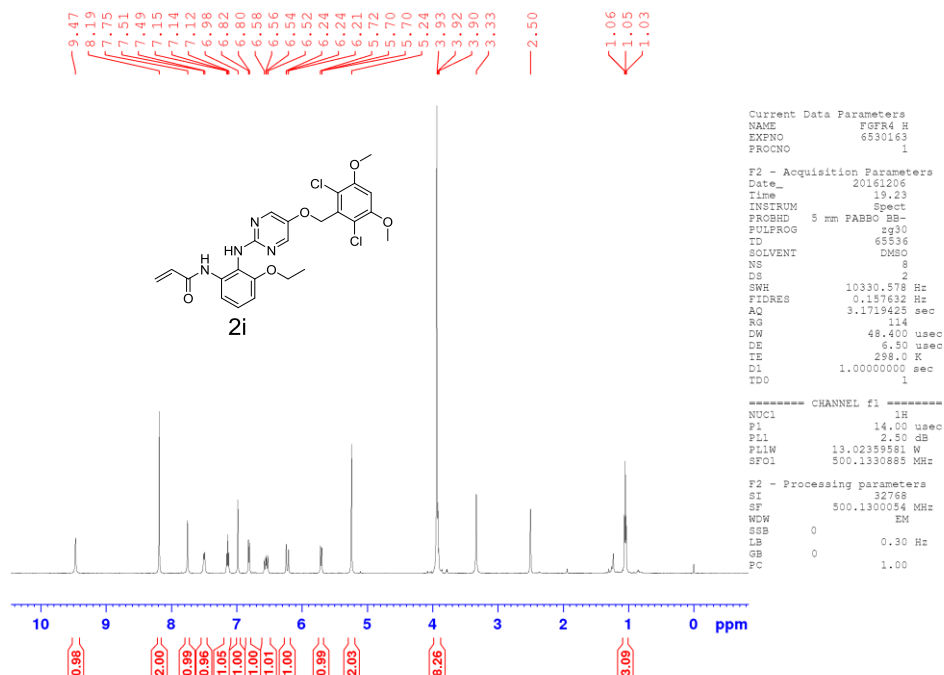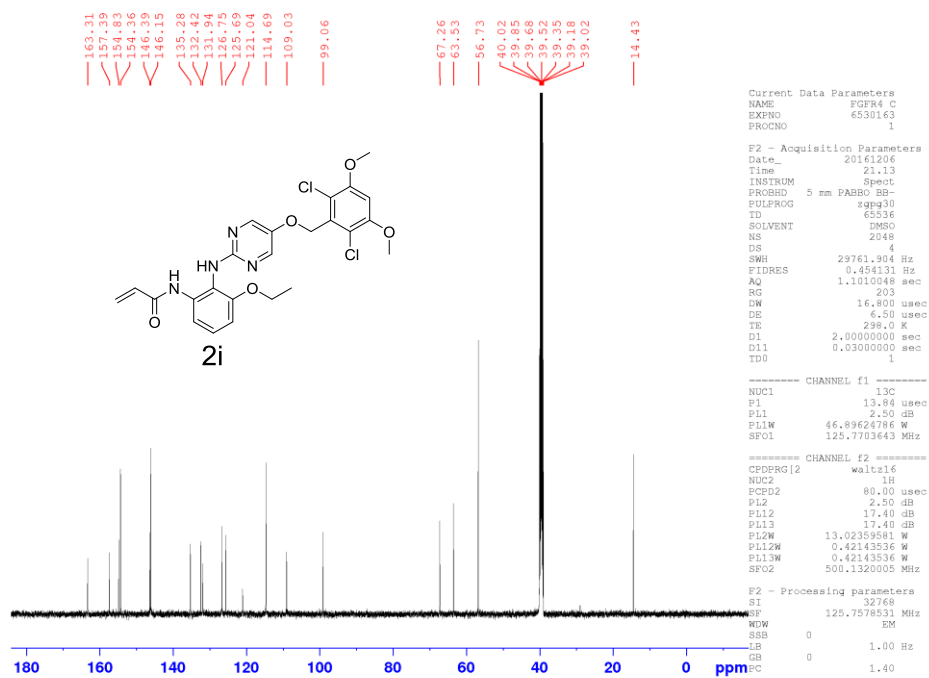

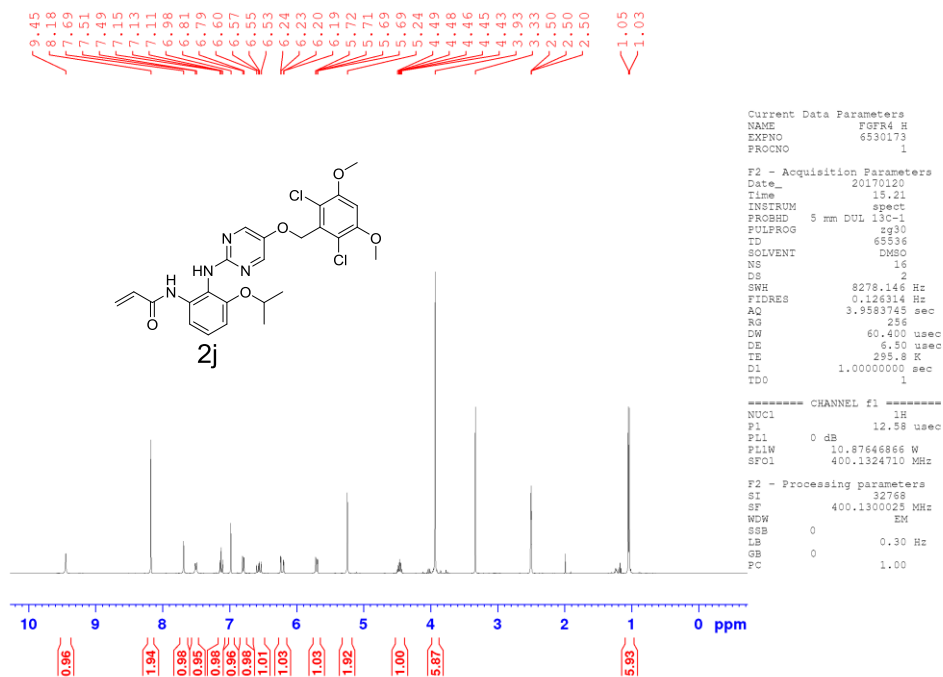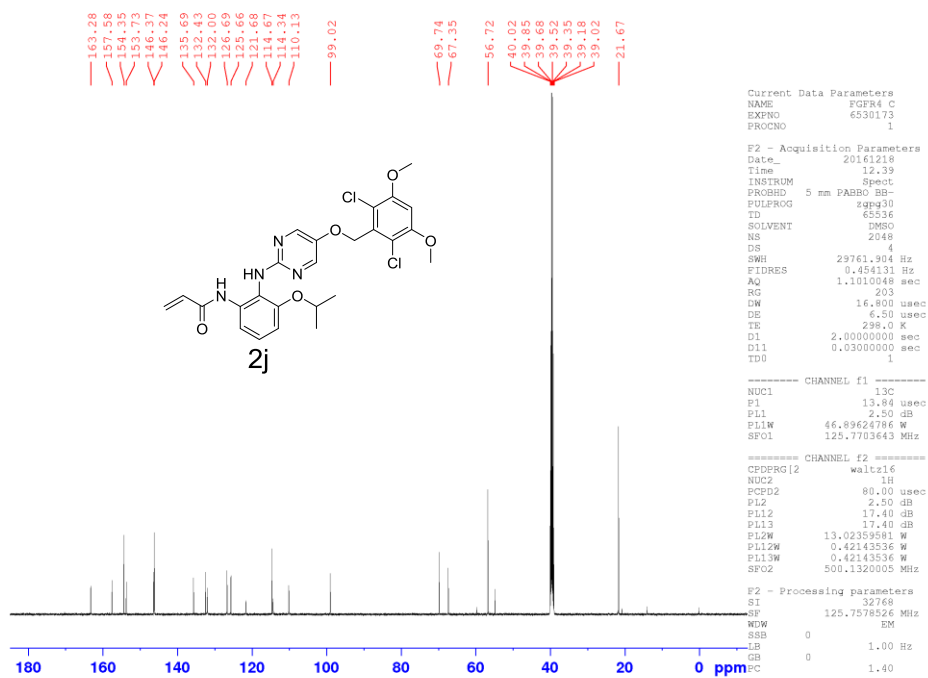

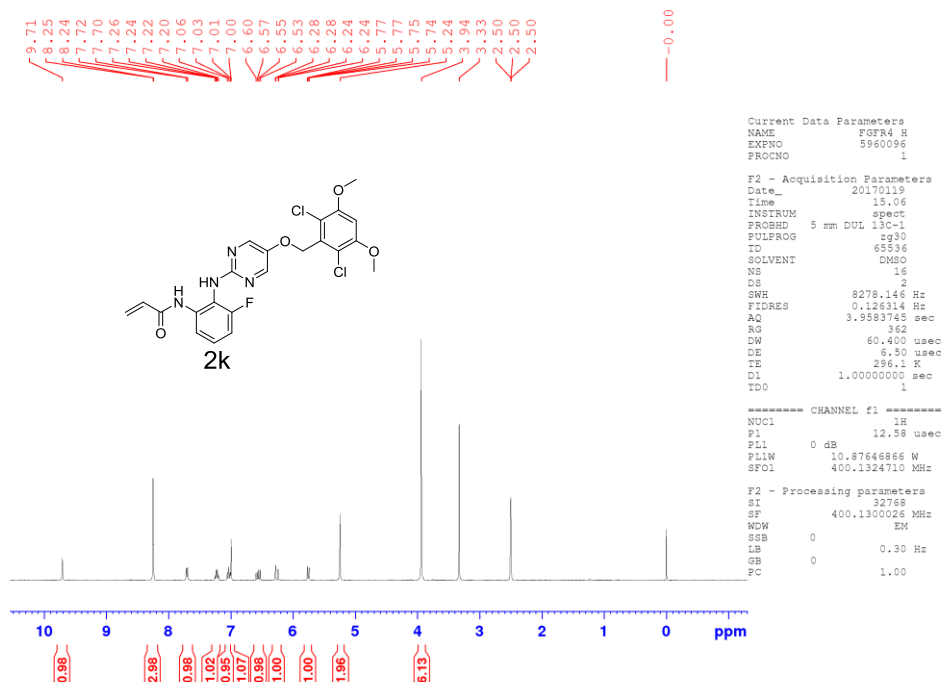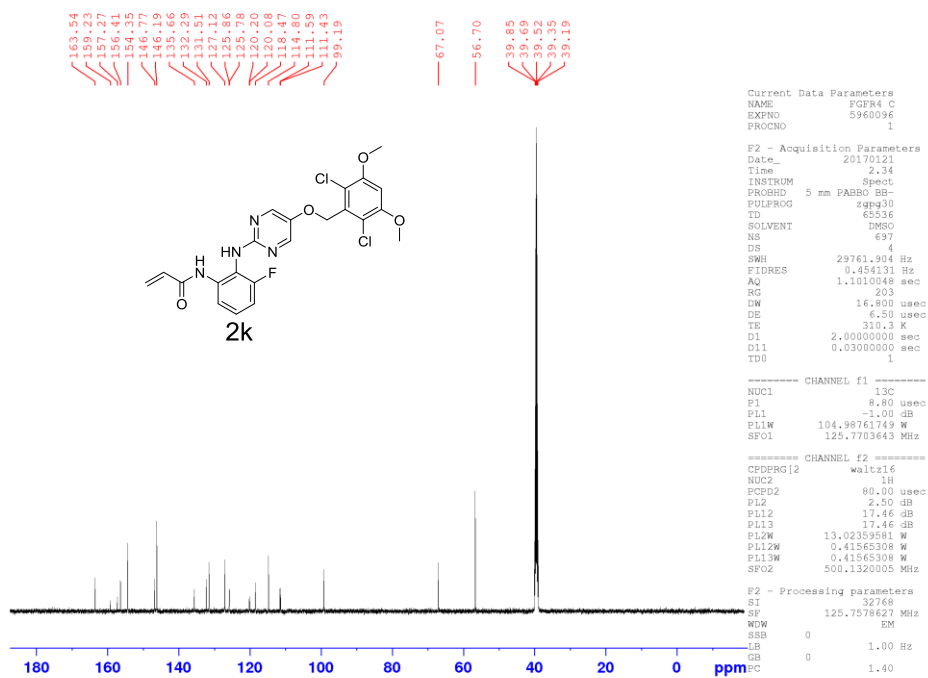

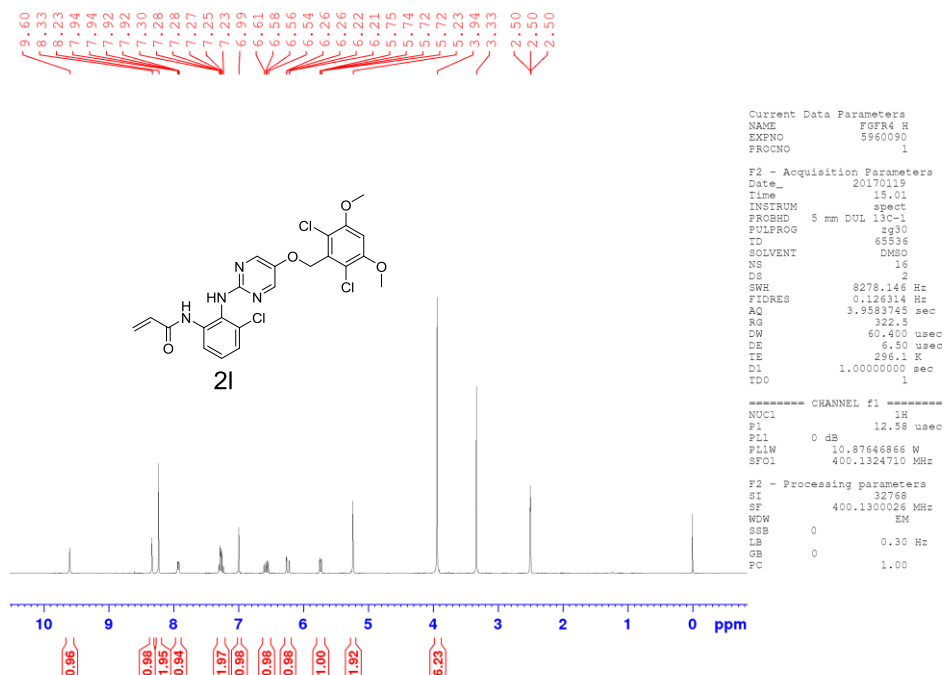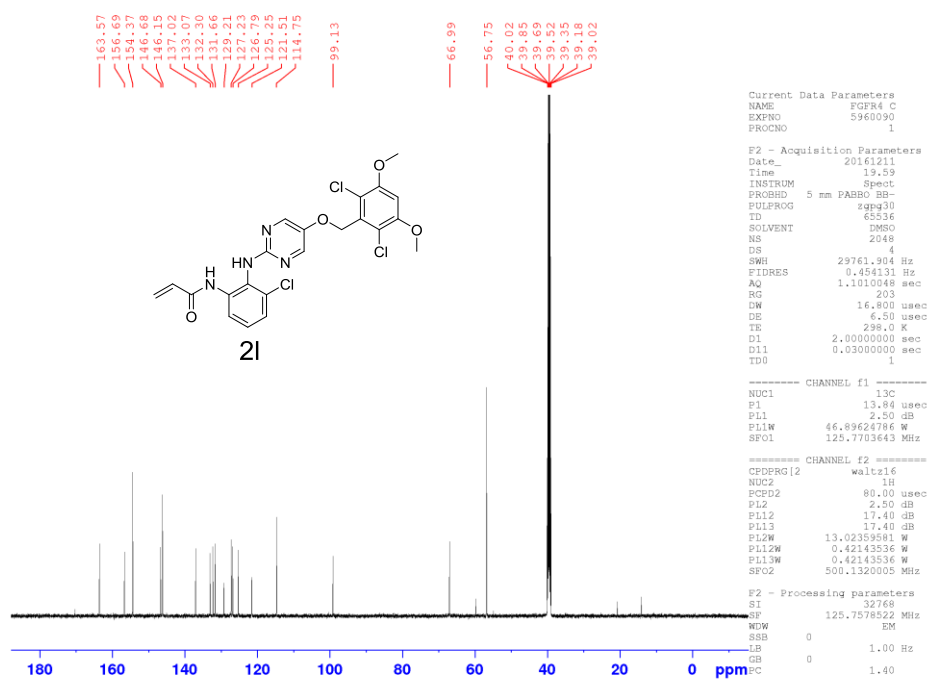

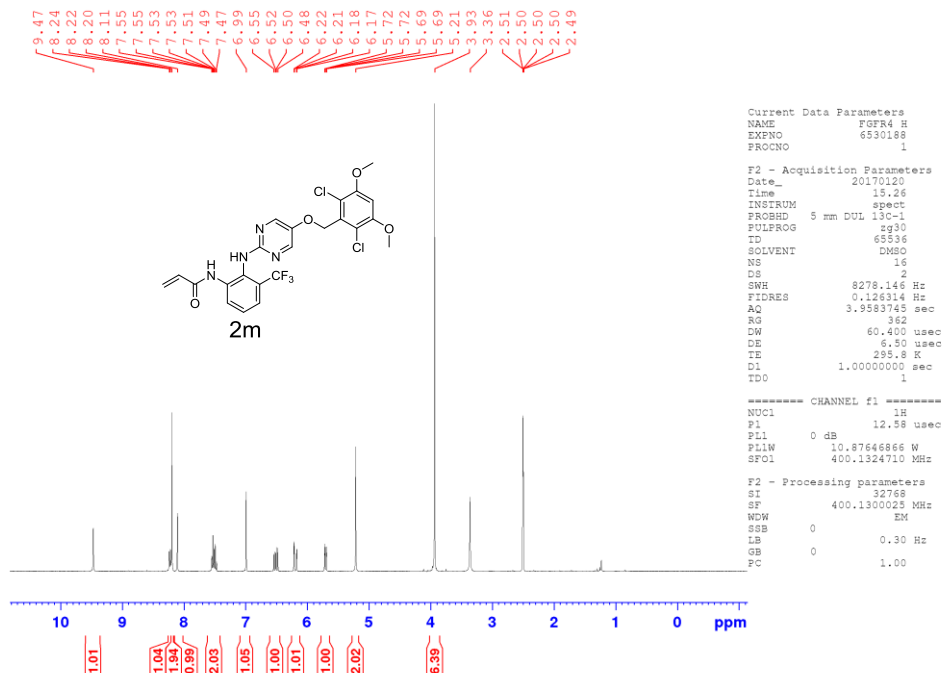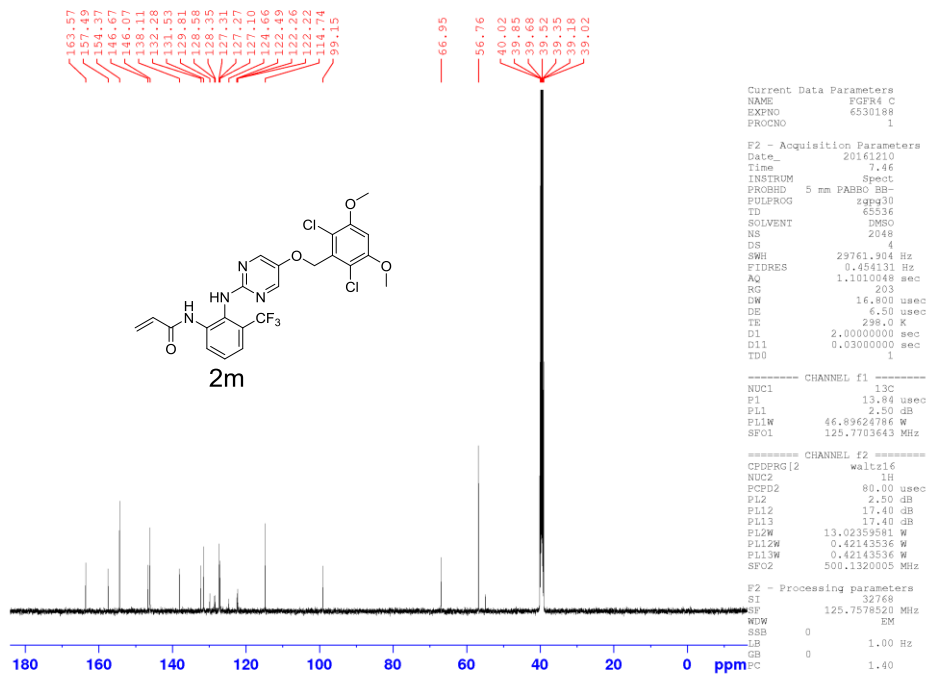

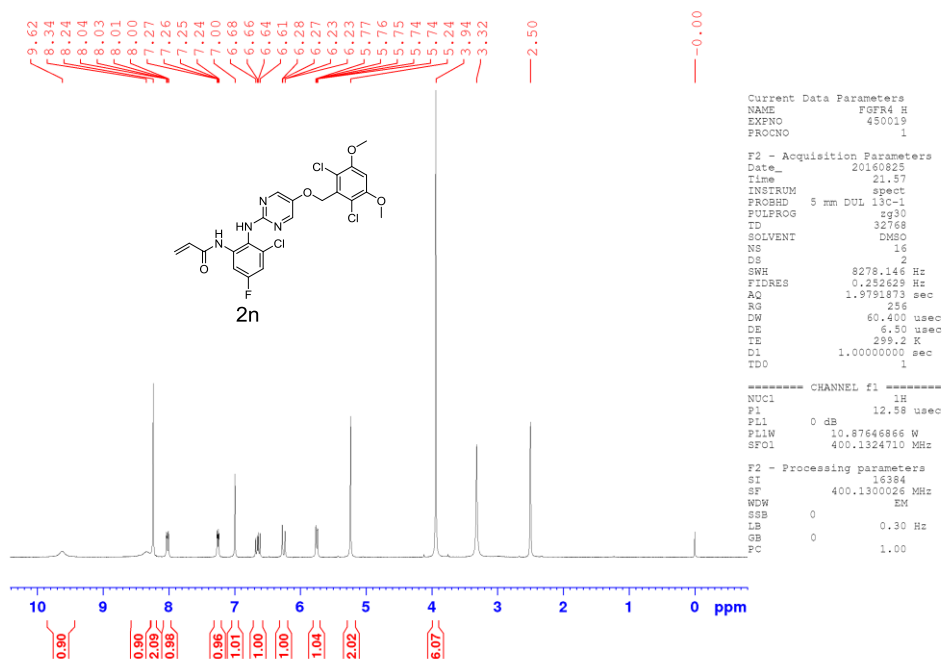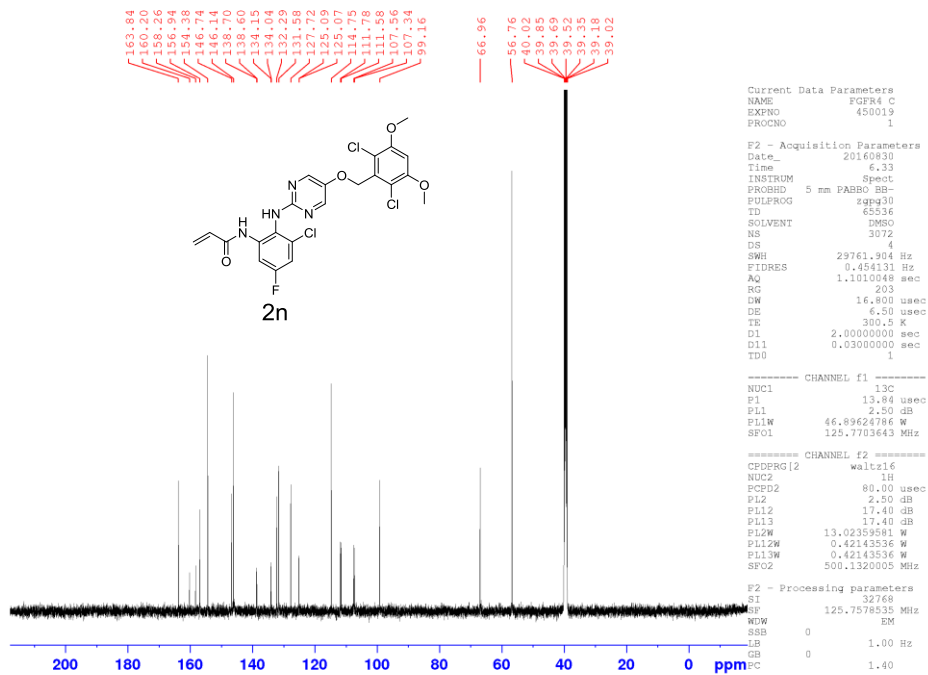

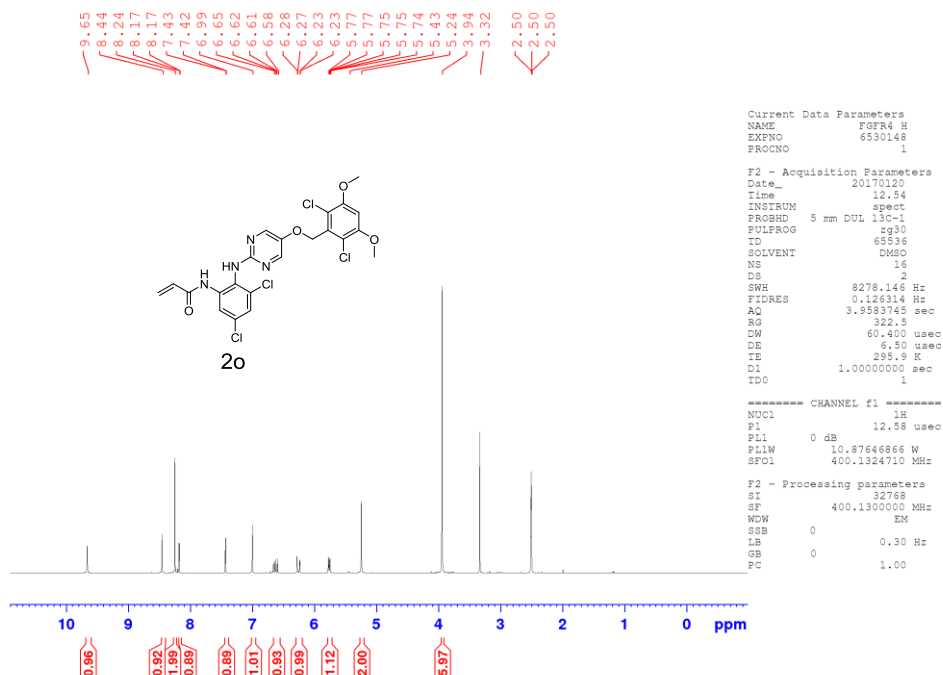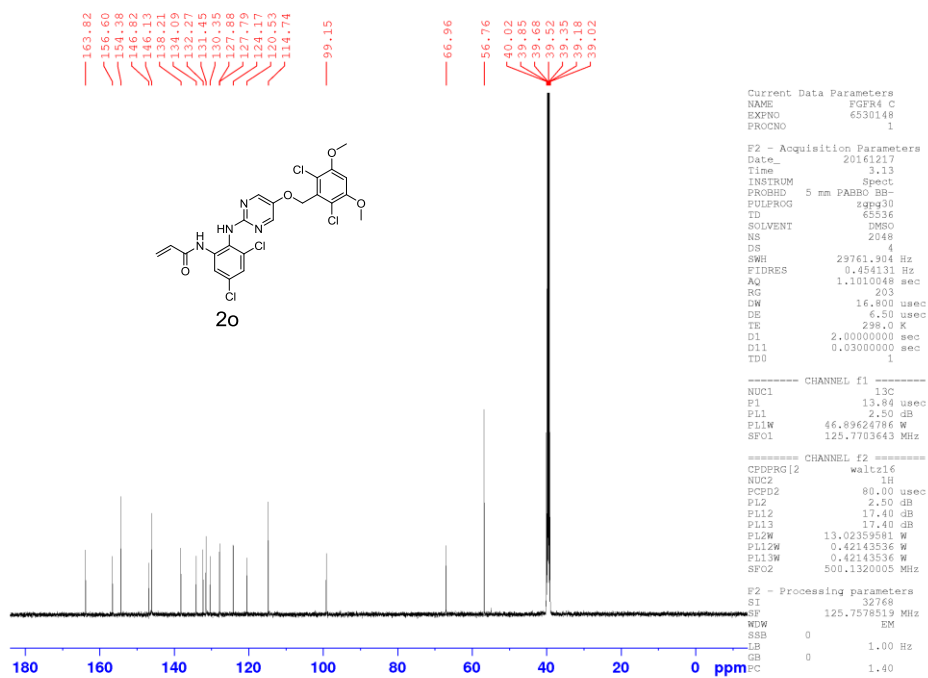

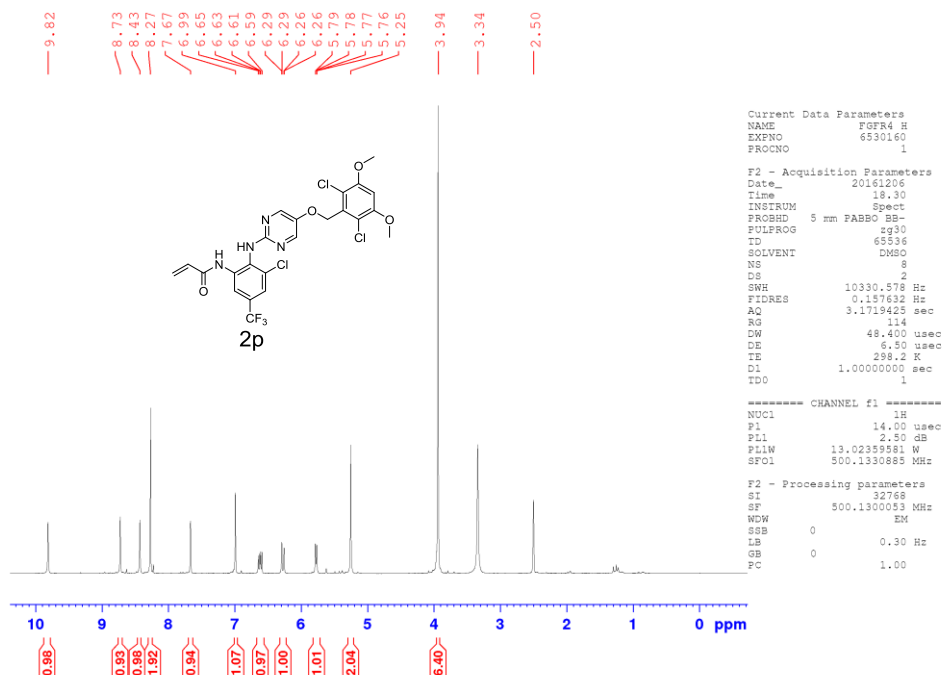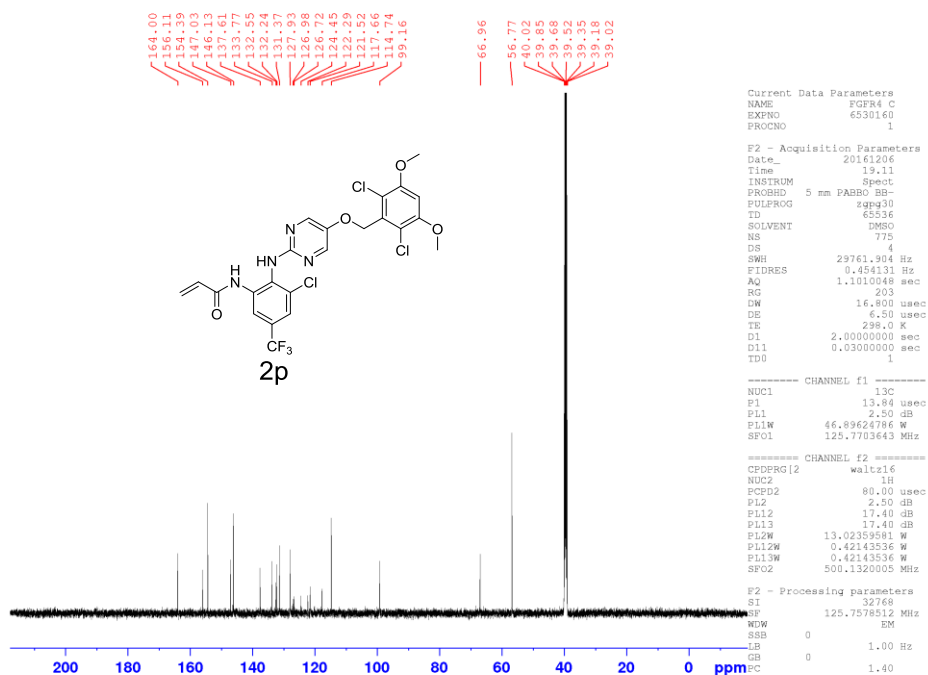



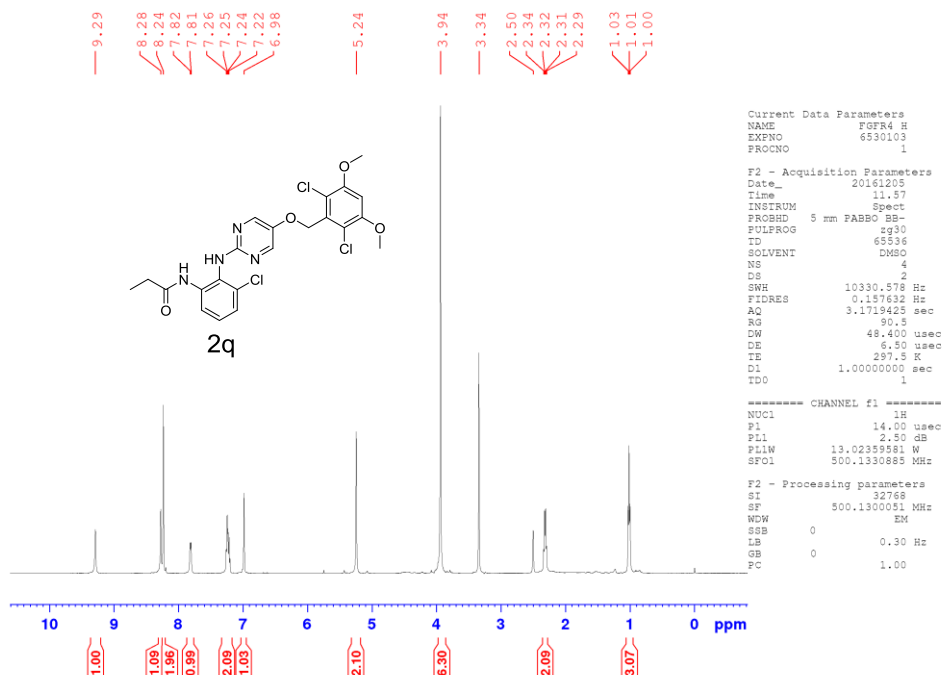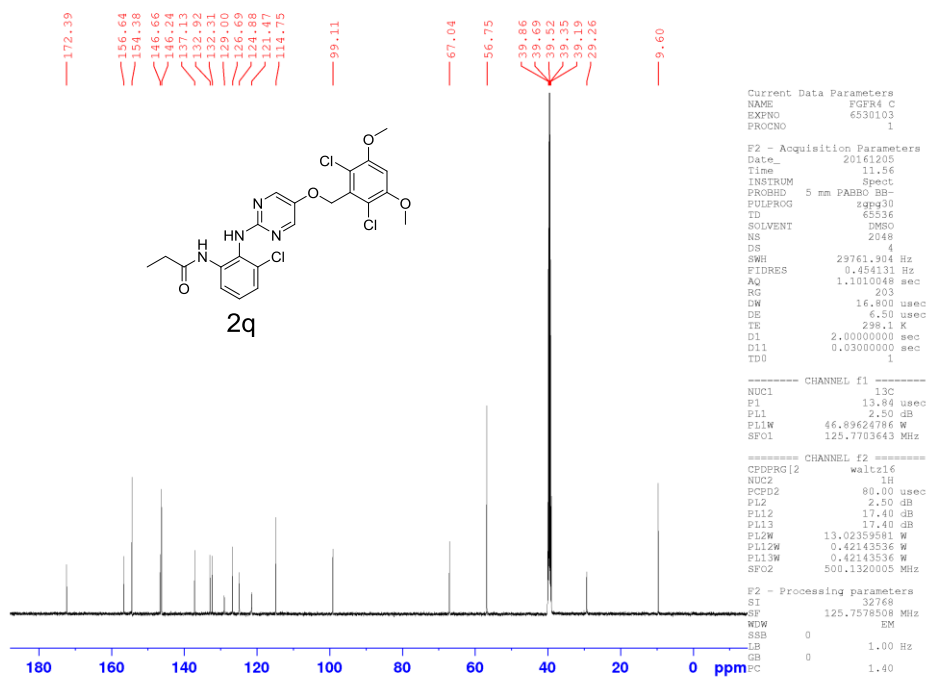

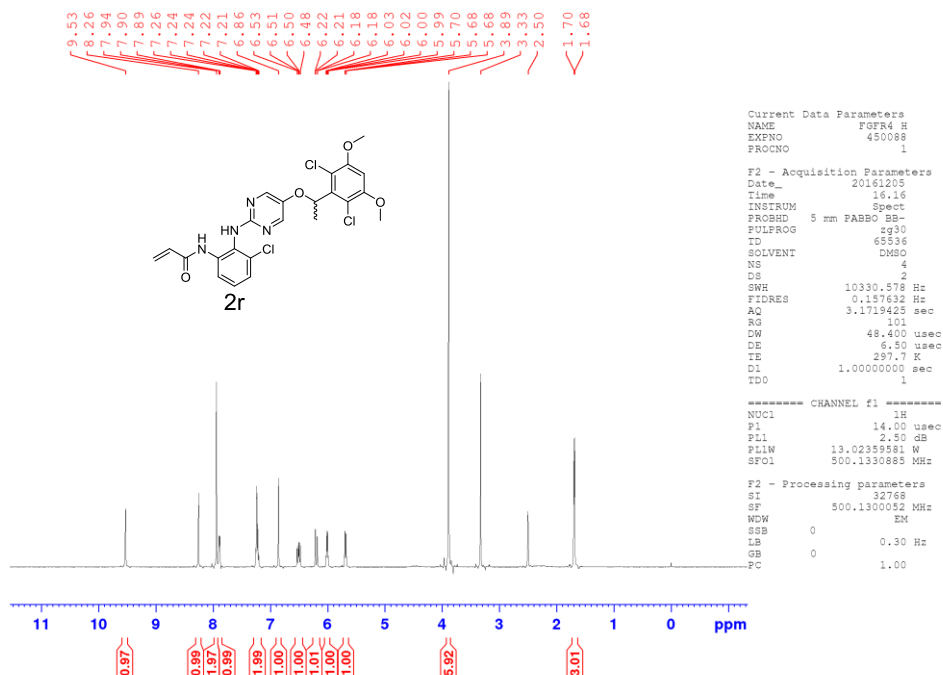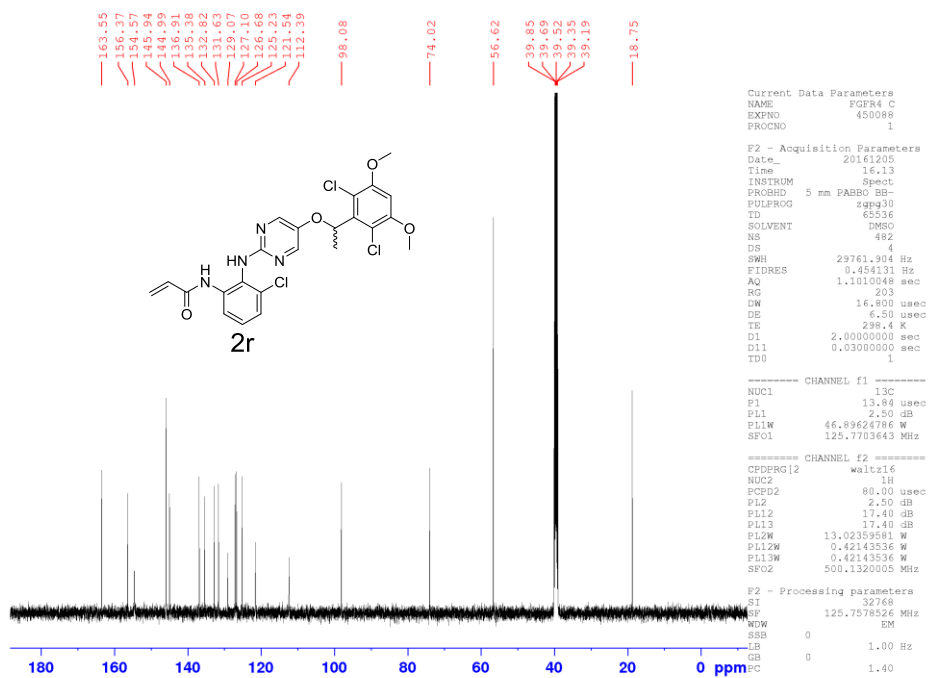

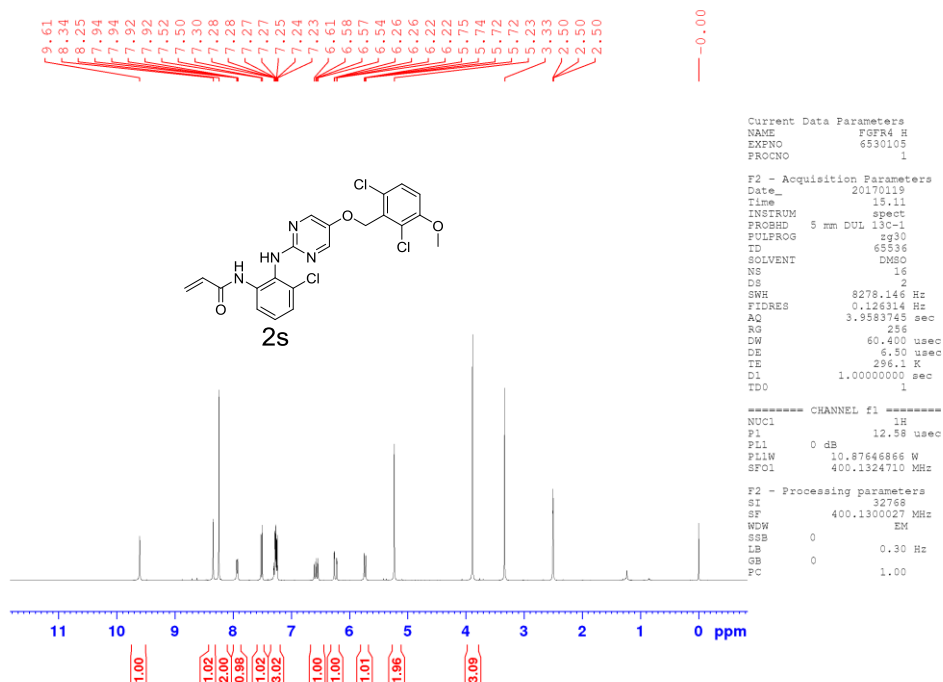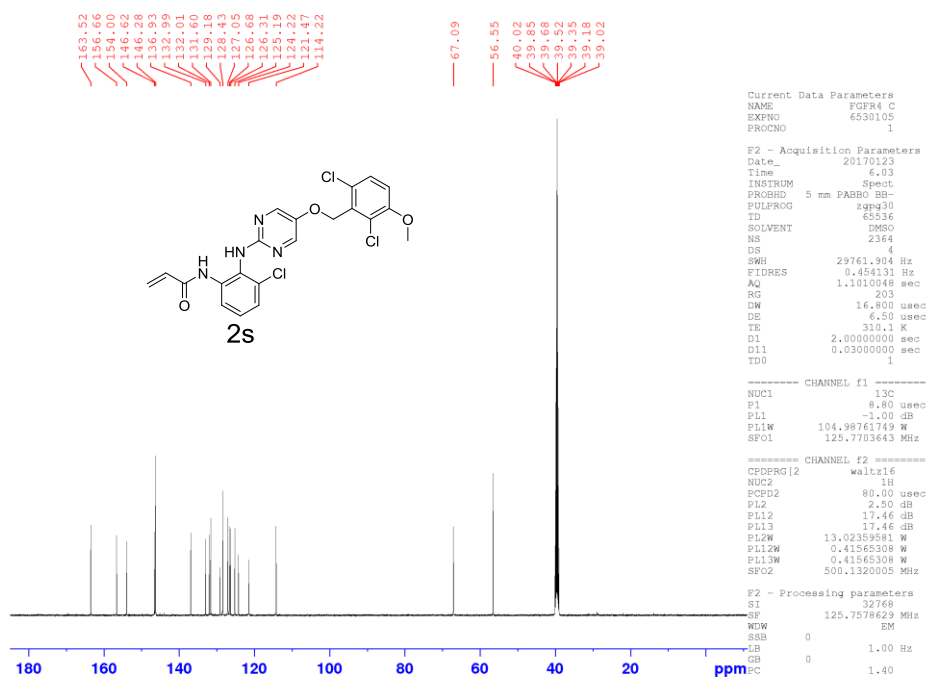

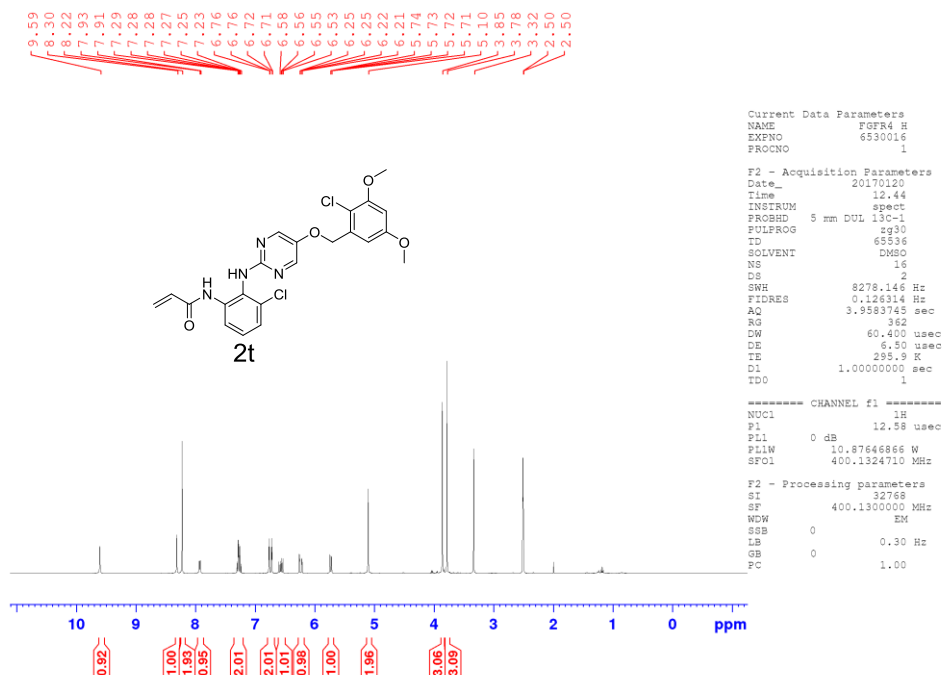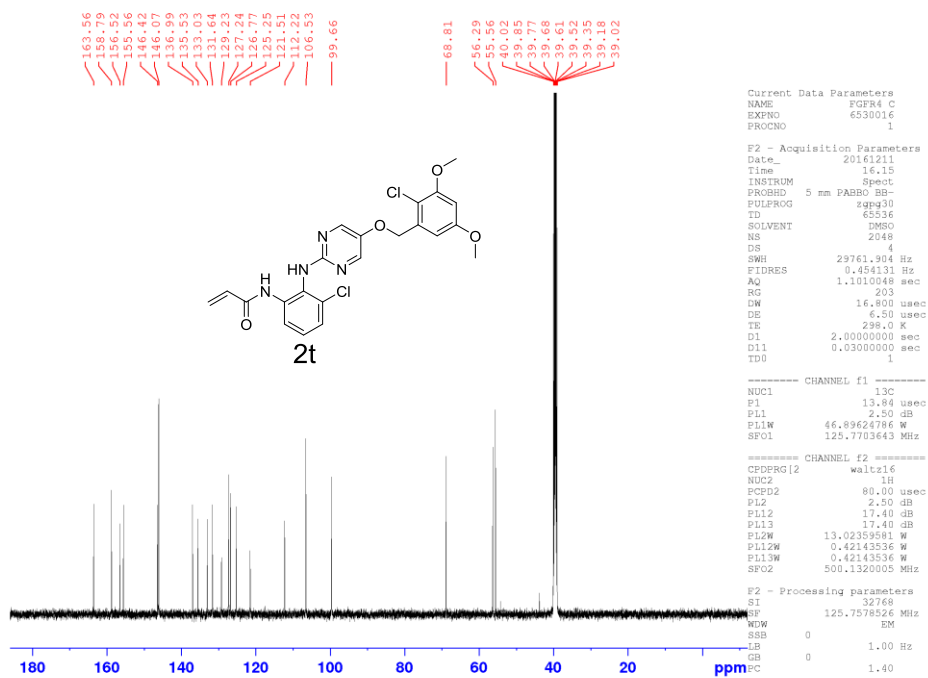

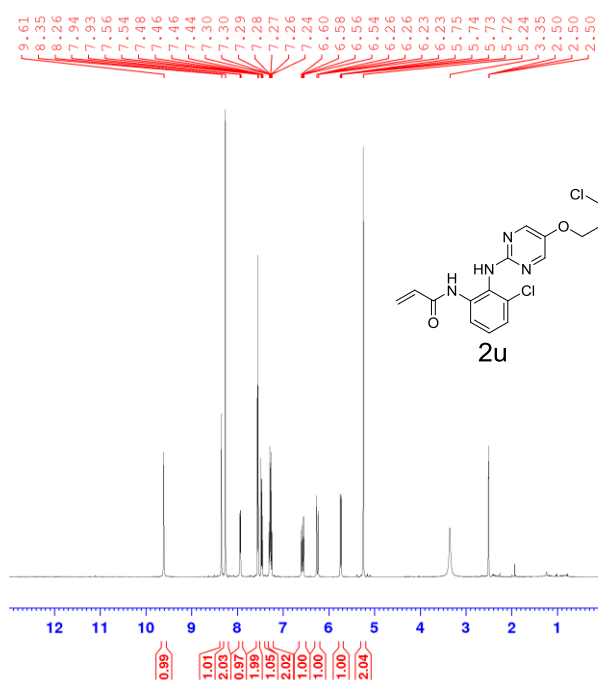

Current Data Parameters  
NAME FGFR4 H  
EXPNO 6530014  
PROCNO 1

F2 - Acquisition Parameters  
Date\_ 20161208  
Time 11.30  
INSTRUM Spect  
PROBHD 5 mm PABBO BB-  
PULPROG zg30  
TD 65536  
SOLVENT DMSO  
NS 8  
DS 2  
SWH 10330.578 Hz  
FIDRES 0.157632 Hz  
AQ 3.1719425 sec  
RG 114  
DW 48.400 usec  
DE 6.50 usec  
TE 298.3 K  
D1 1.00000000 sec  
TDO 1

----- CHANNEL f1 -----  
NUC1 1H  
P1 14.00 usec  
PL1 2.50 dB  
PL1W 13.02359581 W  
SF01 500.1330885 MHz

F2 - Processing parameters  
SI 32768  
SF 500.1300053 MHz  
WDW EM  
SSB 0  
LB 0.30 Hz  
GB 0  
PC 1.00

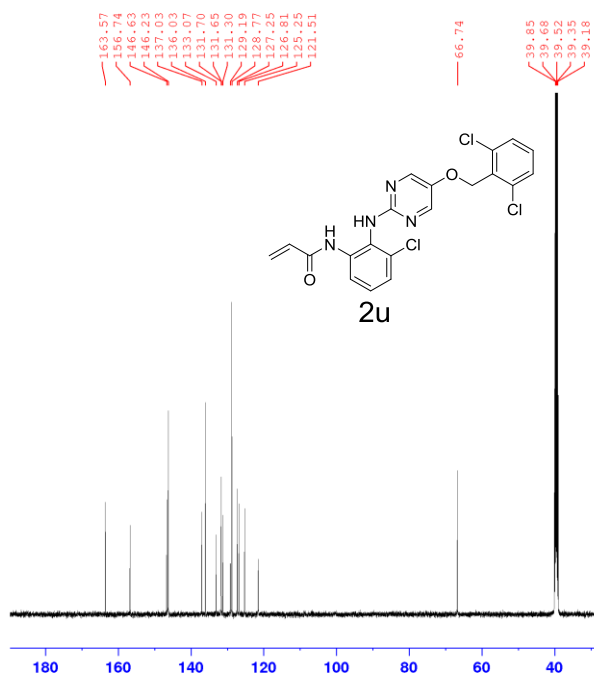

Current Data Parameters  
NAME FGFR4 C  
EXPNO 6530014  
PROCNO 1

F2 - Acquisition Parameters  
Date\_ 20161208  
Time 13.19  
INSTRUM Spect  
PROBHD 5 mm PABBO BB-  
PULPROG zgpg30  
TD 65536  
SOLVENT DMSO  
NS 2048  
DS 4  
SWH 29761.904 Hz  
FIDRES 0.454131 Hz  
AQ 1.1010048 sec  
RG 203  
DW 16.800 usec  
DE 6.50 usec  
TE 298.3 K  
D1 2.00000000 sec  
D11 0.03000000 sec  
TDO 1

----- CHANNEL f1 -----  
NUC1 13C  
P1 13.84 usec  
PL1 2.50 dB  
PL1W 46.89624796 W  
SF01 125.7703643 MHz

----- CHANNEL f2 -----  
CPDPRG2 waltz16  
NUC2 1H  
PCPD2 80.00 usec  
PL2 2.50 dB  
PL12 17.40 dB  
PL13 17.40 dB  
PL12W 13.02359581 W  
PL12W 0.42143536 W  
PL13W 0.42143536 W  
SF02 500.1320005 MHz

F2 - Processing parameters  
SI 32768  
SF 125.7678530 MHz  
WDW EM  
SSB 0  
LB 1.00 Hz  
GB 0  
PC 1.40

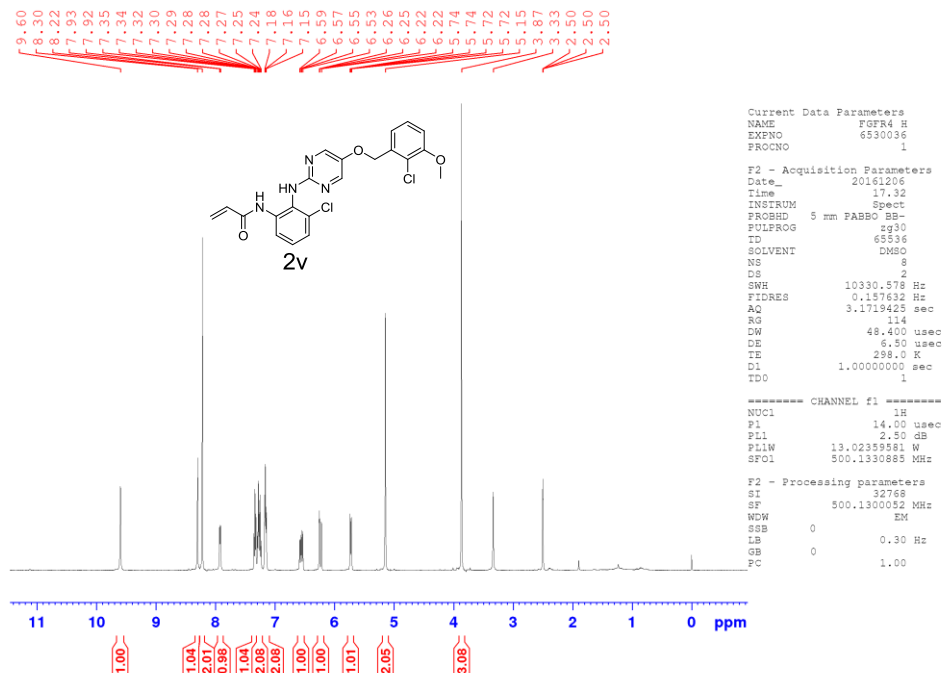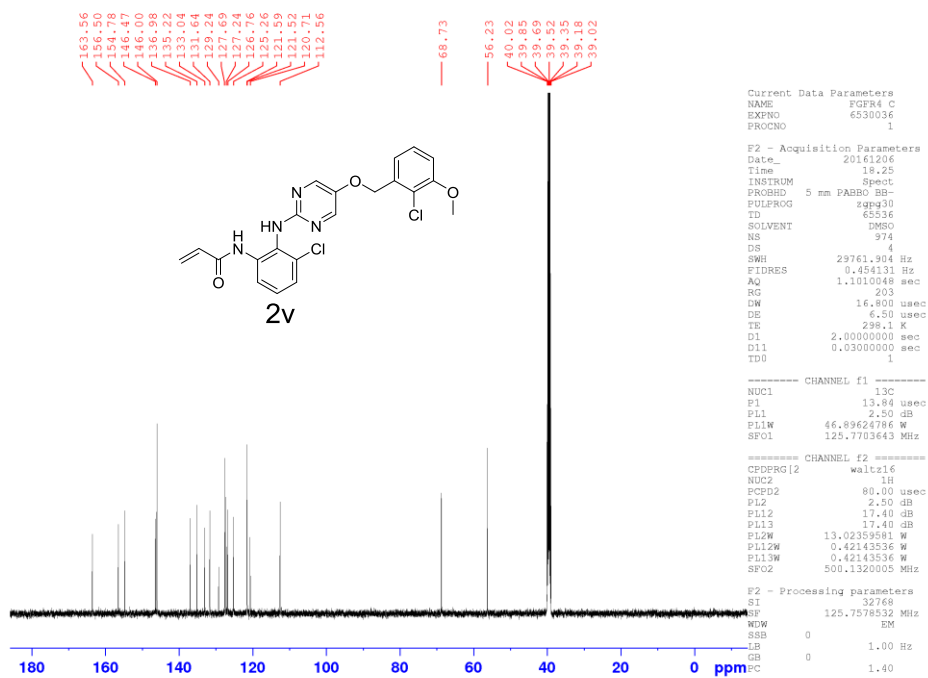

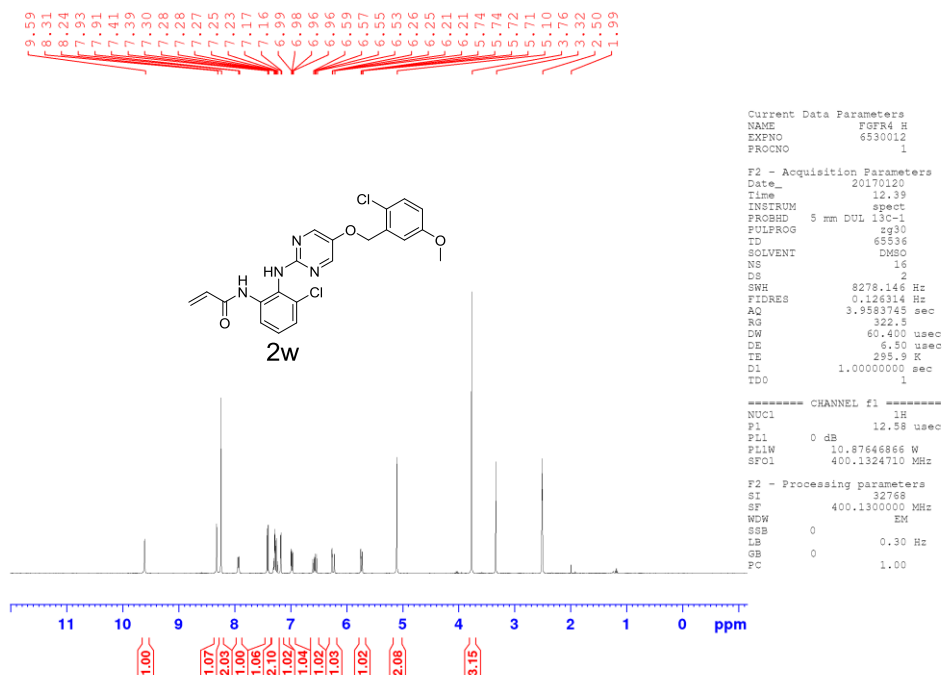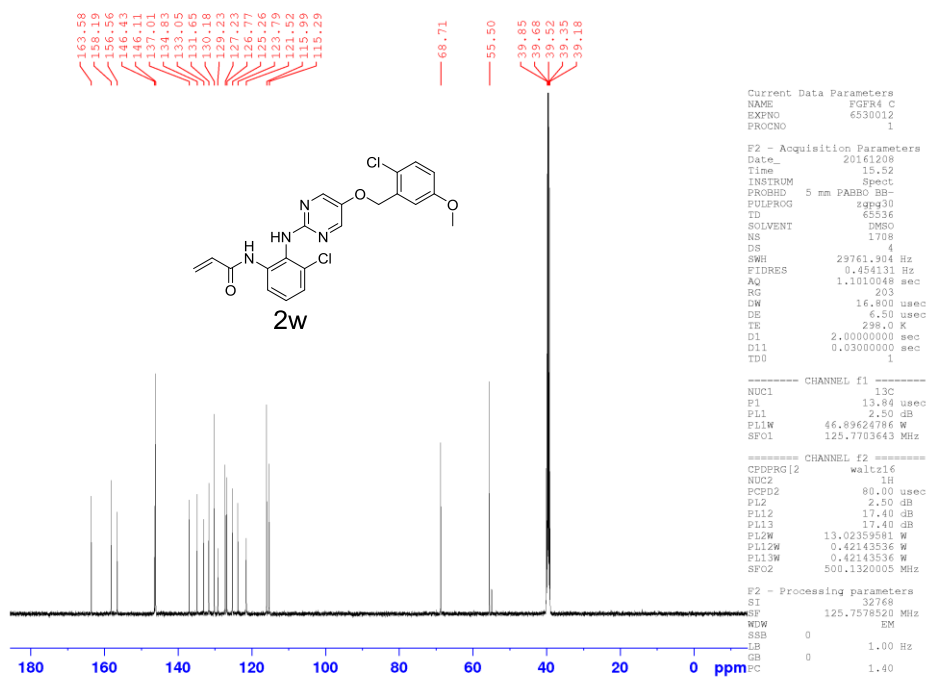

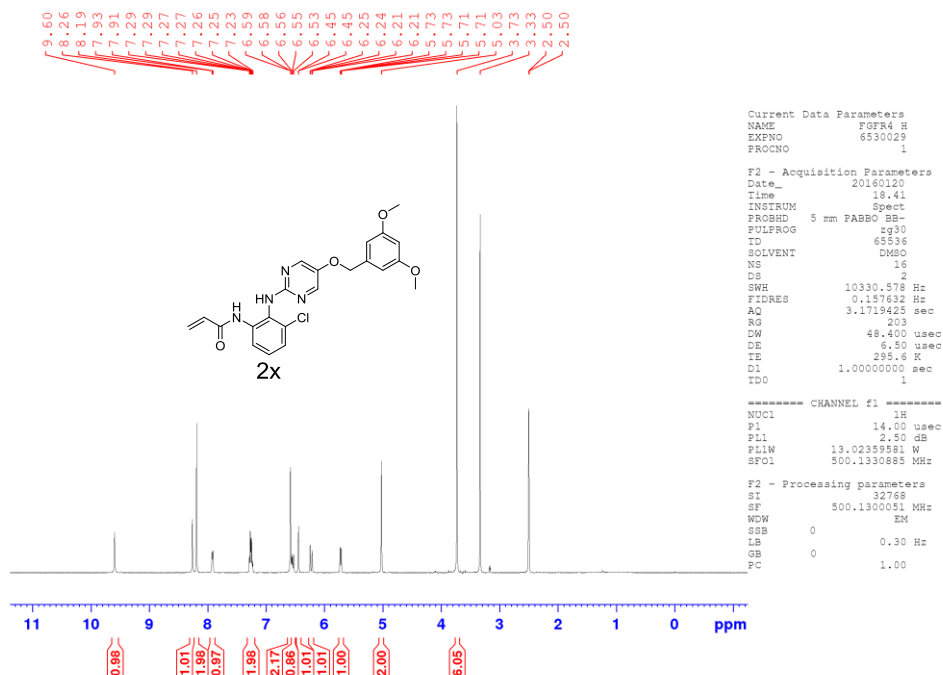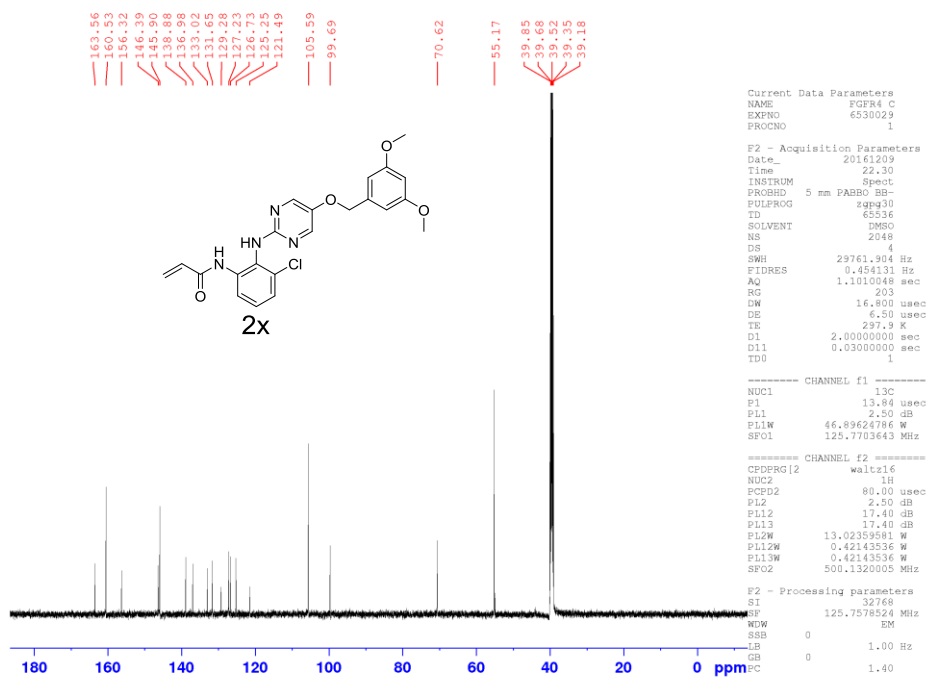



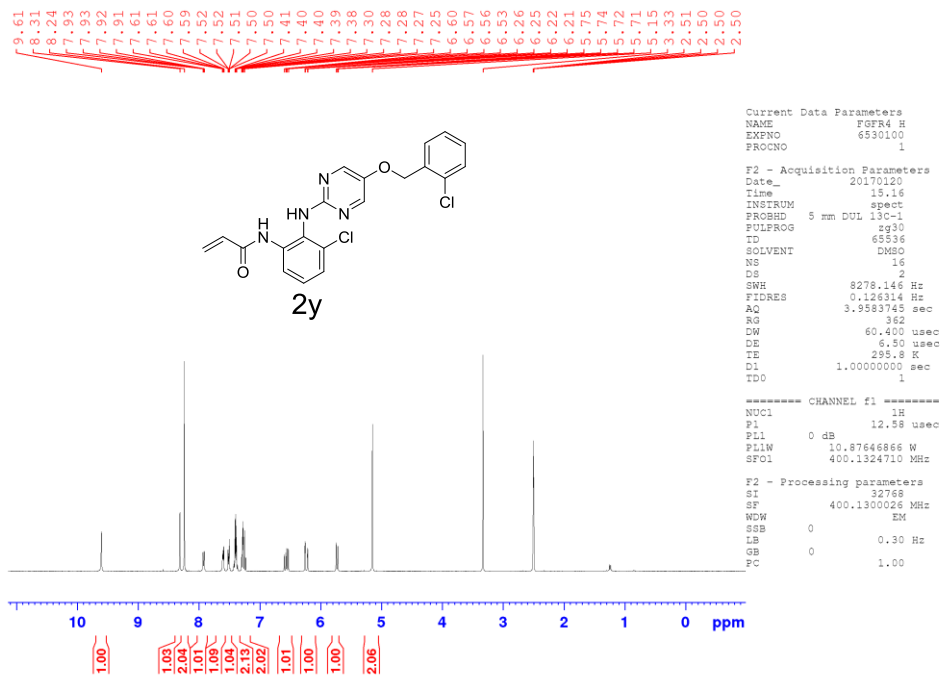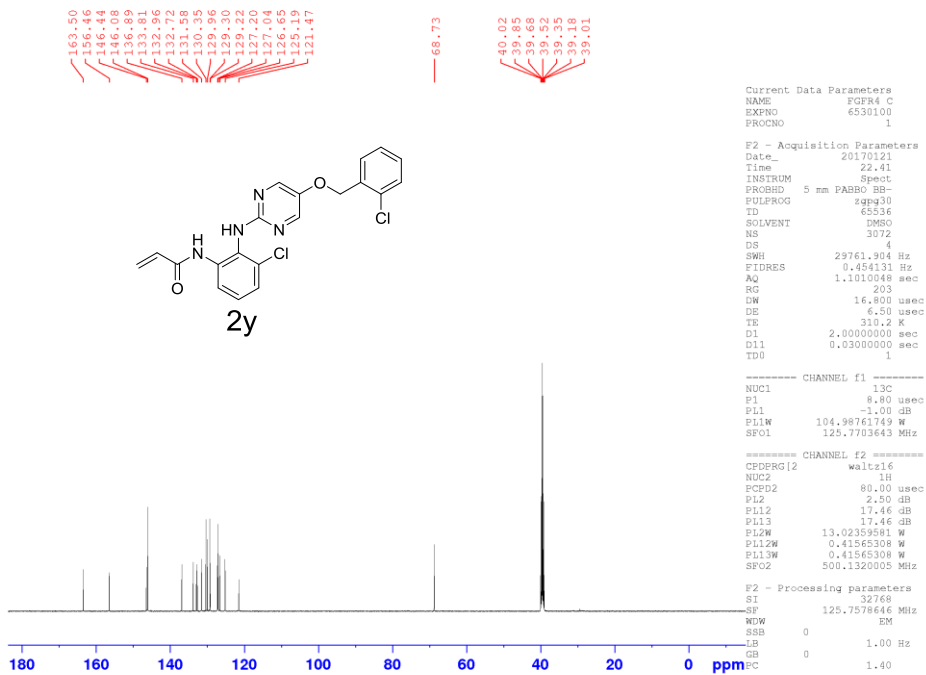

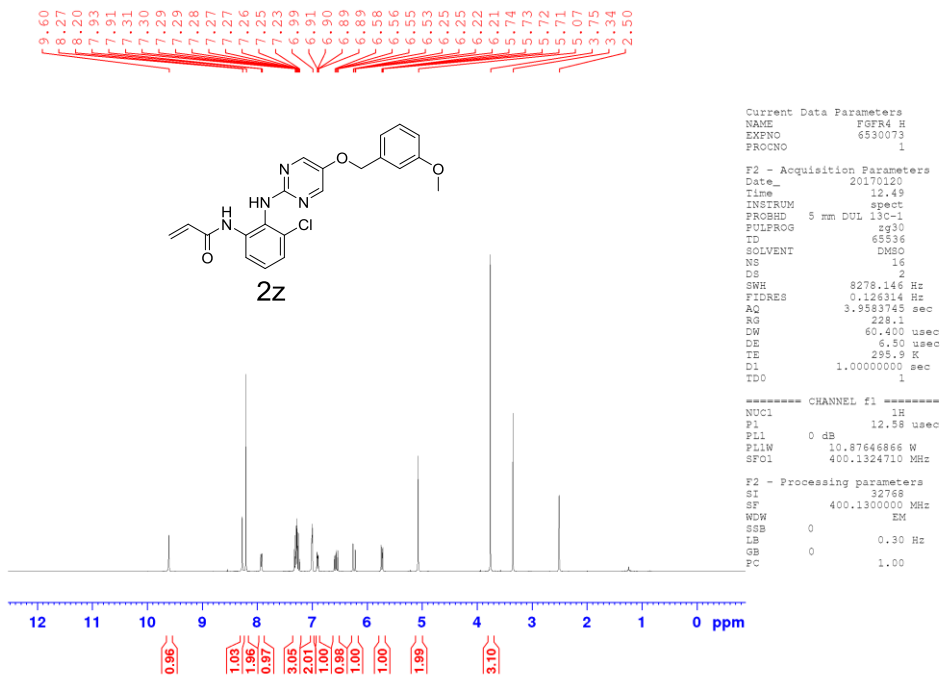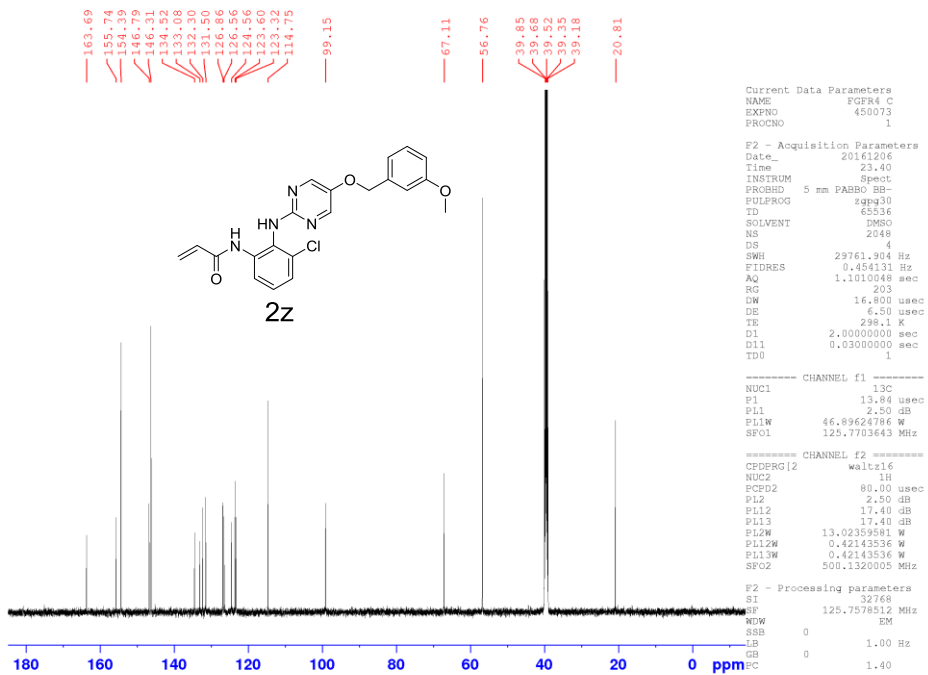

Supplement: Supplementary file 1 [file 7999942]
